# What we talk about when we talk about color

Colin R. Twomey<sup>1,2\*</sup>, Gareth Roberts<sup>1,3</sup>, David H. Brainard<sup>1,4</sup>, & Joshua B. Plotkin<sup>1,2\*</sup>

<sup>1</sup> mindCORE, University of Pennsylvania, Philadelphia, PA, USA

<sup>2</sup> Department of Biology, University of Pennsylvania, Philadelphia, PA, USA

<sup>3</sup> Department of Linguistics, University of Pennsylvania, Philadelphia, PA, USA

<sup>4</sup> Department of Psychology, University of Pennsylvania, Philadelphia, PA, USA

\* Corresponding author. Email: [crtwomey@sas.upenn.edu](mailto:crtwomey@sas.upenn.edu) (C.R.T.); [jplotkin@sas.upenn.edu](mailto:jplotkin@sas.upenn.edu) (J.B.P.)

**Names for colors vary widely across languages, but color categories are remarkably consistent (Berlin & Kay, 1969). Shared mechanisms of color perception help explain consistent partitions of visible light into discrete color vocabularies (Regier et al., 2007). But the mappings from colors to words are not identical across languages, which may reflect communicative needs – how often speakers must refer to objects of different color (Gibson et al., 2017). Here we quantify the communicative needs of colors in 130 different languages by means of a novel inference algorithm. We find that communicative needs are not uniform: some regions of color space exhibit 30-fold greater demand for communication than other regions. The regions of greatest demand correlate with the colors of salient objects, including ripe fruits in primate diets. Our analysis also reveals a hidden diversity in the communicative needs of colors across different languages, which is partly explained by differences in geographic location and the local biogeography of linguistic communities. Accounting for language-specific, non-uniform communicative needs improves predictions for how a language maps colors to words, and how these mappings vary across languages. Our account closes an important gap in the compression theory of color naming, while opening new directions to study cross-cultural variation in the need to communicate different colors and its impact on the cultural evolution of color categories.**

## 1 The color word problem

2 What colors are “green” to an English speaker? Are they the same  
3 as what a French speaker calls “vert?” Berlin & Kay [1] and Kay  
4 et al. [4] studied this question on a world-wide scale, surveying  
5 the color vocabularies of 130 linguistic communities using a stan-  
6 dardized set of color stimuli (Fig. 1a). They found that color voc-  
7 abularies of independent linguistic origin are remarkably consis-  
8 tent in how they partition color space [1]. In languages with two  
9 major color terms, one term typically describes white and warm  
10 colors (red/yellow) and the other describes black and cool col-  
11 ors (green/blue). If a language has three color terms, there is  
12 typically a term for white, a term for red/yellow, and a term for  
13 black/green/blue. Languages with yet larger color vocabularies re-  
14 main largely predictable in how they partition the space of perceiv-  
15 able colors into discrete terms [5–8] (Fig. 1b).

16 What explains these shared patterns? To talk about color, a lan-  
17 guage must represent the vast space of human perceivable colors  
18 with a comparatively small set of color terms. The compression  
19 theory of color naming [2, 9–11] seeks to explain color vocabularies  
20 as an efficient mapping from colors to terms, based on the  
21 psychophysics of human color perception and the utility, or need,  
22 to reference different colors.

23 Judgements of color appearance by humans with normal color  
24 vision are remarkably stable despite genetic variability in photore-  
25 ceptor spectral sensitivities [12], age-dependent variability in light  
26 filtering of the eye [13], and variation in the proportion of different  
27 classes of retinal cone photoreceptors [14, 15]. The shared psy-  
28 chophysics of perception therefore provides a common metric for  
29 color similarity, and common limits on the gamut of perceivable  
30 colors, which each contribute to shared patterns in color naming  
31 across languages [1, 2, 16–23].

32 Recent work [3, 24, 25] has also found that color terms tend  
33 to reflect how often speakers need to refer to different colors,  
34 with a trend that emphasizes communication about warm hues

(red/yellow) over cool hues (blue/green). Shared communicative  
needs of colors – e.g., emphasizing the colors of greatest impor-  
tance to ancestral humans, such as those of ripe fruits or dangerous  
animals [26] – also helps explain shared patterns in color naming  
across languages.

However, estimating communicative needs is non-trivial. Sev-  
eral approaches have been proposed: using the statistics of sur-  
face reflectances in natural scenes [9]; assuming a uniform distri-  
bution over highly saturated colors [2]; using a world-wide average  
of capacity-achieving priors [11, 27]; or extrapolating from En-  
glish word-frequency corpus data [28]. The aim of all of these ap-  
proaches is to approximate a single distribution of needs common  
to all languages worldwide. But unlike perception, needs may vary  
across cultures – and this variation might explain why color voc-  
abularies, though similar, are far from identical across languages.  
A complete theory of color naming must explain cross-language  
variation as well as shared trends. But to date, language-specific  
communicative needs are unknown.

Here, we seek to close this gap in the compression theory  
of color naming by providing a new way to directly estimate  
language-specific communicative needs of colors. Without making  
strong assumptions about the origins or characteristics of commu-  
nicative needs, we derive a novel algorithm to solve a natural in-  
verse problem; we infer the most conservative (maximum entropy)  
distribution of communicative needs across colors consistent with  
positions of focal colors in a language’s vocabulary – e.g. the “red-  
dest red” and the “greenest green.” Our approach explains focal  
colors as a natural part of the compression theory of color naming,  
and it allows us to test predictions for term maps against indepen-  
dent empirical data that was not used in fitting our model.

Applying our method we infer the language-specific commu-  
nicative needs for 130 languages around the world. We confirm that  
shared trends in communicative needs across languages are related  
to the colors of salient objects [3], but we also find substantial vari-  
ation in communicative needs across languages. This variation is

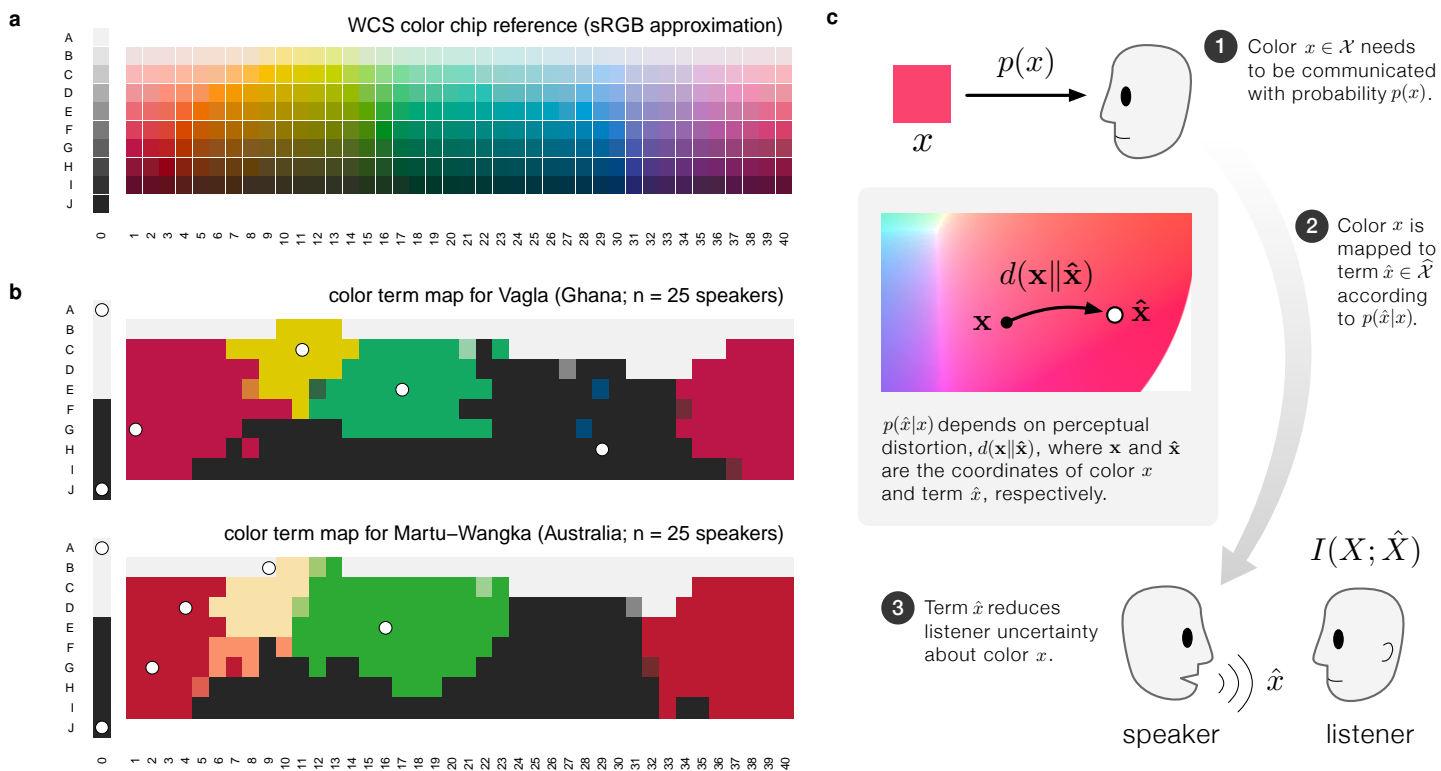

**Figure 1. Cross-linguistic patterns in color naming and the rate-distortion hypothesis.** Berlin & Kay (B&K) [1] and the World Color Survey (WCS) [4] studied color vocabularies in 130 languages around the world (see Methods: World Color Survey). (a) The 330 color chips named by native speakers in the WCS study. (b) Empirical color vocabularies for two example languages in the WCS, each with 6 basic color terms. Color chips correspond to panel (a) but they have been colored according to the focal color of the term chosen by the majority of speakers surveyed<sup>†</sup>. The languages Vagla and Martu-Wangka, although linguistically unrelated and separated by nearly 14,000 km, have remarkably similar partitions of colors into basic color terms [4]. (c) Schematic diagram of rate-distortion theory applied to color naming. A speaker needs to refer to color  $x$  with probability  $p(x)$ . The speaker uses a probabilistic rule  $p(\hat{x}|x)$  to assign color terms,  $\hat{x}$ , to colors,  $x$ . This rule depends on the perceptual distortion  $d(x||\hat{x})$  introduced by substituting  $\hat{x}$  for the true color,  $x$ , where each term  $\hat{x}$  is associated with a coordinate in color space. The choice of the term  $\hat{x}$  by the speaker reduces the listener’s uncertainty about the true color being referenced, measured on average by the mutual information  $I(X; \hat{X})$ . While any probabilistic mapping from colors to terms,  $p(\hat{x}|x)$ , is possible, some mappings are more efficient than others. Rate-distortion theory provides optimal term mappings that allow a listener to glean as much information as possible, for a given level of tolerable distortion and distribution of communicative needs  $p(x)$ .

70 consequential: accounting for variation in needs substantially improves the prediction of color terms in each language. Moreover, this variation in needs across linguistic communities is meaningful: it correlates with differences in geographic location and local biogeography. Our account supports an emerging, unified view of the color word problem that integrates the shared psychophysics of color perception with language-specific communicative needs for colors. We show that this view is consistent with both shared patterns and observed variability across languages.

### 79 Color naming as a compression problem

80 In the compression model of color naming first introduced by Yendrikhovskij [9] and with recent extensions by Zaslavsky et al. [11], a color in the set of all perceivable colors,  $x \in \mathcal{X}$ , needs to be communicated with some probability,  $p(x)$ , to a listener. The speaker cannot be infinitely precise when referring to  $x$ , and must instead use a term,  $\hat{x}$ , from their shared color vocabulary,  $\hat{\mathcal{X}}$ . Many colors in  $\mathcal{X}$  map to the same term, so that a listener hearing  $\hat{x}$  will

<sup>†</sup> Or by a mixture of the best choice focal colors when there was more than one best choice.

not know exactly which color  $x$  was referenced. Color naming is then distilled to the following problem: how do we choose the mapping from colors to color terms? Rate-distortion theory [29–32], the branch of information theory concerned with lossy compression, provides an answer.

Mapping colors to a limited set of terms necessarily introduces imprecision or “distortion” in communication. The amount of distortion depends on a listener’s expectation about what color,  $x$ , a speaker is referencing when she utters color term  $\hat{x}$ . Under the rate-distortion hypothesis, a language’s mapping from colors to terms allows a listener to glean as much information as possible about color  $x$  from a speaker’s choice of term  $\hat{x}$  (Fig. 1c).

Each color  $x \in \mathcal{X}$  is identified with a unique position, denoted  $\mathbf{x}$ , in a perceptually uniform color space. Here we use CIE Lab as in Regier et al. [2]. The coordinates corresponding to a color term  $\hat{x}$  are given by its centroid: the weighted average of all colors a speaker associates with that term,  $\hat{\mathbf{x}} = \sum_x \mathbf{x} p(x|\hat{x})$ . The distortion introduced when a speaker uses  $\hat{x}$  to refer to  $x$  is simply the squared Euclidean distance between  $\mathbf{x}$  and  $\hat{\mathbf{x}}$  in CIE Lab, denoted  $d(\mathbf{x}||\hat{\mathbf{x}})$ . Intuitively, colors that are near  $\hat{\mathbf{x}}$  are more likely to be assigned to the term  $\hat{x}$  than colors that are far (Fig. 1c).

The mathematics of compression provides optimal ways to represent information for a given level of tolerable distortion. The size of a compressed representation,  $\hat{X}$ , is measured by the amount of information it retains about the uncompressed source,  $X$ , given by the mutual information  $I(X; \hat{X})$ . Terms represent colors by specifying the probability of using a particular term  $\hat{x} \in \hat{\mathcal{X}}$  to refer to a given color  $x \in \mathcal{X}$ , denoted  $p(\hat{x}|x)$ . Rate-distortion efficient mappings are choices of the mapping  $p(\hat{x}|x)$  that minimize  $I(X; \hat{X})$  such that the expected distortion,  $\mathbb{E}d(\mathbf{x}||\hat{\mathbf{x}})$ , does not exceed a given tolerable level. Efficient mappings and centroid positions can be found for a large class of distortion functions known as Bregman divergences, which includes the CIE Lab measure of perceptual distance (SI Sec. A).

## Communicative needs of colors

Rate-distortion theory provides an efficient mapping from colors to terms that depends on three choices: the distortion function in color space, the degree of distortion tolerated by the language, and the probability  $p(x)$  that each color needs to be referenced during communication, called the “communicative need.” Previous studies have largely focused on communicative needs that are shared across all languages, considering distributions that are either uniform across the WCS color stimuli [7], correlated with the statistics of natural images [9] or the color of salient objects [3], approximated by a world-wide average “capacity achieving prior” [11, 27], or related to linguistic usage [33] as e.g. approximated by the frequencies of words for color in English-language corpus data [28]. As a result, prior studies have drawn conflicting conclusions about whether communicative needs matter for color naming, and little is known about whether communicative needs vary across languages or whether such variation is significant for their color vocabularies. While the potential importance of language-specific communicative needs has been discussed [33], here, for the first time, we resolve these questions by directly estimating the communicative needs of colors for each of the 130 languages in the combined B&K+WCS dataset under the compression theory of color naming.

### Algorithm to infer communicative needs

How can we infer the underlying communicative needs of colors from limited empirical data? Here we derive an algorithm that finds the maximum-entropy estimate of the underlying communicative needs  $p(x)$  consistent with a rate-distortion optimal vocabulary with known centroid coordinates  $\hat{\mathbf{x}}$  and term frequencies  $p(\hat{x})$ , for any Bregman divergence measure of distortion.

The estimate of communicative needs has the form  $q(x) = \sum_{\hat{x}} q^*(x|\hat{x})p(\hat{x})$ , with

$$q^*(x|\hat{x}) = \arg \max_{q(x|\hat{x}) \in Q} H(X). \quad (1)$$

In words, the optimal  $q^*(x|\hat{x})$  is the choice of  $q(x|\hat{x})$  that maximizes the entropy,  $H(X)$ , among the the set of conditional probability distributions  $Q$  whose predicted focal color coordinates match the observed coordinates for each color term. We construct

this solution via a novel iterative alternating maximization algorithm (see SI Sec. B for its derivation),

$$\begin{cases} q_t(\hat{x}|x) \propto q_t(x|\hat{x})p(\hat{x}), & (2) \\ q_{t+1}(x|\hat{x}) \propto q_t(\hat{x}|x)e^{\langle \mathbf{x}, \nu_t(\hat{x}) \rangle}, & (3) \end{cases}$$

where the vectors  $\nu_t(\hat{x})$  are chosen so that predicted focal color coordinates match observed coordinates (SI Sec. B).

This algorithm provably converges to a unique, globally optimal, maximum-entropy estimate of the true communicative need  $p(x)$  (SI Sec. B.1 and B.2). Remarkably, we can construct this solution knowing only that the observed coordinates  $\hat{\mathbf{x}}$  are rate-distortion optimal centroids, without knowledge of the specific distortion measure (SI Sec. B.3; SI Fig. B1).

### Inference from focal colors

Our algorithm infers a language’s communicative needs from knowledge of the centroids associated with its color terms. Berlin & Kay measured the “focal color” of each color term by asking native speakers to choose from among the Munsell stimuli (Fig. 1a) the “best example” of that term. We propose that the measured focal colors are in fact the centroids for each term.<sup>†</sup> This hypothesis may appear problematic since laboratory experiments suggest focal colors and category centroids are distinct points in color space [34–36]. However, centroids in those studies were calculated under the implicit assumption of uniform communicative needs, leaving open the possibility that focal colors are centroids under the true distribution of non-uniform needs (SI Sec. A.3).

Our approach provides an unbiased inference of language-specific communicative needs that does not make strong assumptions about the form of  $p(x)$  or depend on additional, unmeasured quantities for each WCS language. Prior work on a universal distribution of needs relies on strong assumptions about the form of  $p(x)$  (see SI Sec. B.3, & D), and so applying it to individual languages in the WCS produces implausible inferences (SI Fig. C4ab). Alternatively, there is a prior language-specific approach based on word frequency data, but this approach cannot be applied to the vast majority of languages in the WCS that lack this information (SI Sec. D.1, SI Fig. D10b). Moreover, unlike prior work, our inference of language-specific needs does not rely on knowing the empirical mapping from colors to terms,  $p(\hat{x}|x)$ , which is the quantity that we ultimately wish to predict from any theory of color naming (SI Fig. D9).

### Different colors, different needs

Our analysis reveals extensive variation in the demand to speak about different regions of color space (Fig. 2a). Averaged over all 130 B&K+WCS languages, the inferred communicative needs emphasize some colors (e.g. bright yellows and reds) up to 36-fold more strongly than others (e.g. blue/green pastels and browns). This conclusion stands in sharp contrast to prior work that assumed a uniform distribution of needs [2] and attributed color naming to the shape of color space alone.

<sup>†</sup>More precisely, we propose the measured focal colors are the best approximation to the true centroid among the set of WCS color stimuli.

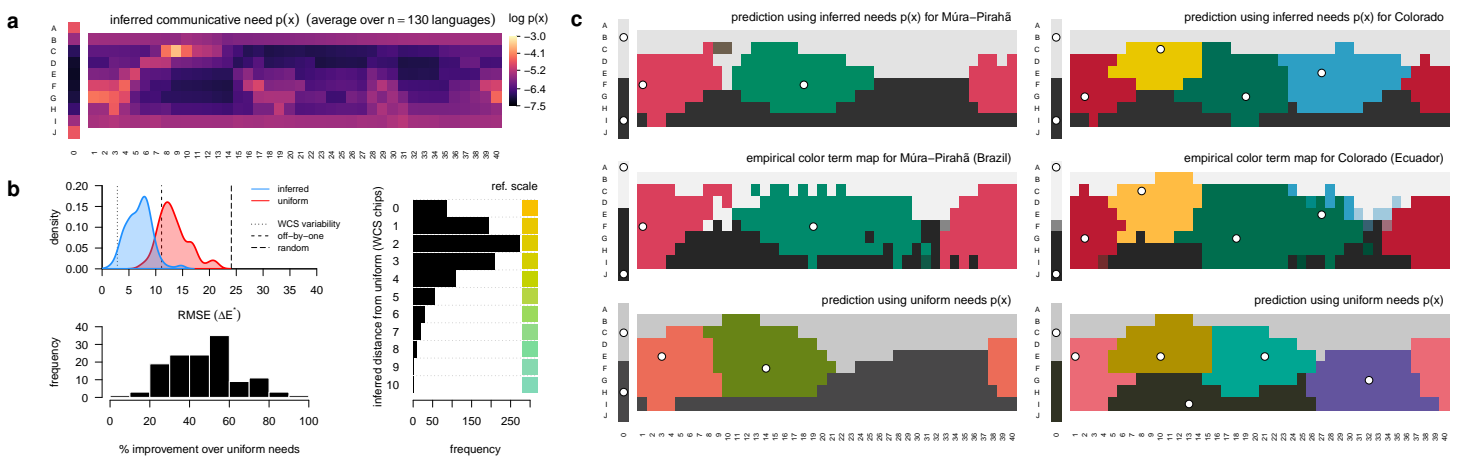

**Figure 2. Inferred distributions of communicative needs.** (a) The mean inferred distribution of communicative need,  $p(x)$ , averaged across the WCS and B&K survey data ( $n = 130$  languages). Color chips correspond to those shown in Figure 1a. We infer 36-fold variation in communicative need across color chips, with greater demand for communication about yellows and reds, for example, than for blues and greens. (b) The color vocabulary of a language predicted by rate-distortion theory better matches the empirical vocabulary when we account for variation in the need to communicate about different colors. (Top-left) The error between the predicted and empirical focal color positions across  $n = 130$  languages, where predictions are rate-distortion optimal vocabularies assuming either a uniform (red) or the inferred (blue) distribution of communicative needs. Root mean square error (RMSE) is measured in units of CIE Lab perceptual distance (denoted  $\Delta E^*$ ; Methods: RMSE of focal color predictions). Reference lines show RMSE when empirical focal points are compared to random focal points (*random*), displaced by one WCS column or row (*off-by-one*), and by sampling from participant responses (*WCS variability*) (see SI Sec. C.1). (Bottom-left) The relative improvement (reduction in error) using the inferred versus uniform distribution of communicative need. (Right) Difference in focal point positions of rate-distortion optimal vocabularies, under inferred versus uniform communicative needs. (c) Two example languages, Múra-Pirahã (left), and Colorado (right), that illustrate how predicted term maps are improved when accounting for non-uniform communicative needs of colors. The region corresponding to each term is colored by the WCS chip closest to the term’s focal point (white points). (Top row) The predicted term maps based on the inferred distribution of communicative needs; (Bottom row) based on a uniform distribution of communicative need; (Middle row) the empirical term maps in the WCS data.

Our ability to predict the color vocabulary of a language is substantially improved once we account for non-uniform communicative needs (Fig. 2b). We find improvement in an absolute sense, as measured by the root mean squared error (RMSE) between predicted and empirically measured focal colors, and also in a relative sense, measured by percent improvement over a uniform distribution of needs. The typical change in predicted focal color once accounting for non-uniform needs is easily perceivable, corresponding to a median change of two WCS color chips (Fig. 2b right). Not only are the predicted focal points in better agreement with the empirical data, once accounting for non-uniform needs, but the entire partitioning of colors into discrete terms is substantially improved, as seen in the example languages Múra-Pirahã and Colorado (Fig. 2c).

We infer communicative needs and predict color terms using data from the first of two experiments in the WCS, which measured focal colors (Fig. 3a). This inference and prediction requires fitting one parameter that controls the “softness” of the partitioning and one hyperparameter to control over-fitting (SI Sec. C). Without any additional fitting, we can then compare the predicted mappings from colors to terms to the empirical term maps measured in the second WCS experiment. For nearly all of the WCS languages analyzed ( $n = 110$ ), the color term maps predicted by rate-distortion theory are significantly improved once accounting for non-uniform communicative needs (improvement in 84% of languages, Fig. 3b). Only 15% of languages show little or no improvement, with an additional 1 outlier, Huave (Huavean, Mexico), that may violate model assumptions in some significant way (see Discussion). The substantial improvement in predicted term maps can be attributed both to universal patterns in communicative needs, shared across

languages, and to language-specific variation in needs (Fig. 3c).

In contrast to prior work on the compression model of color naming [11, 28], no part of our inference procedure uses empirical data on a language’s mapping from colors to terms,  $p(\hat{x}|x)$ .<sup>†</sup> Nor are our predicted color terms simply an out-of-sample prediction, since the predicted quantities,  $p(\hat{x}|x)$ , are not used to parameterize the model. And so our analysis is not simply a fit of the compression model to data, but rather an empirical test of its ability to predict color naming from first principles.

### Communicative needs and the colors of salient objects

We can interpret the inferred communicative needs of colors by comparing them to what is known about the colors of salient objects. Prior work [3] suggests a warm-to-cool trend in communicative need, related to the frequency of colors that appear in foreground objects as identified by humans in a large dataset of natural images [37] (Fig. 4a). We find that the same correlation holds, at least when restricting to the middle range of lightness (color chips in rows C–H; two-sided Spearman’s  $\rho = 0.3$ ,  $p < 0.001$ ,  $n = 240$ ). However the pattern of communicative needs is more complex than this warm-cool gradient alone. Pastels that are greenish blue or blue, as well as brownish-greens, need to be communicated less often than dark green or dark blue, for example. Moreover, dark colors in general (e.g. color chips in rows I–J) show a relatively high communicative need under our inference compared to their frequency in foreground objects of natural images (Fig. 4a).

<sup>†</sup>Nor do we use empirical term maps for selection among the small set of non-unique rate-distortion optimal solutions. In this study, selection is based on focal points alone. See SI Sec. C.



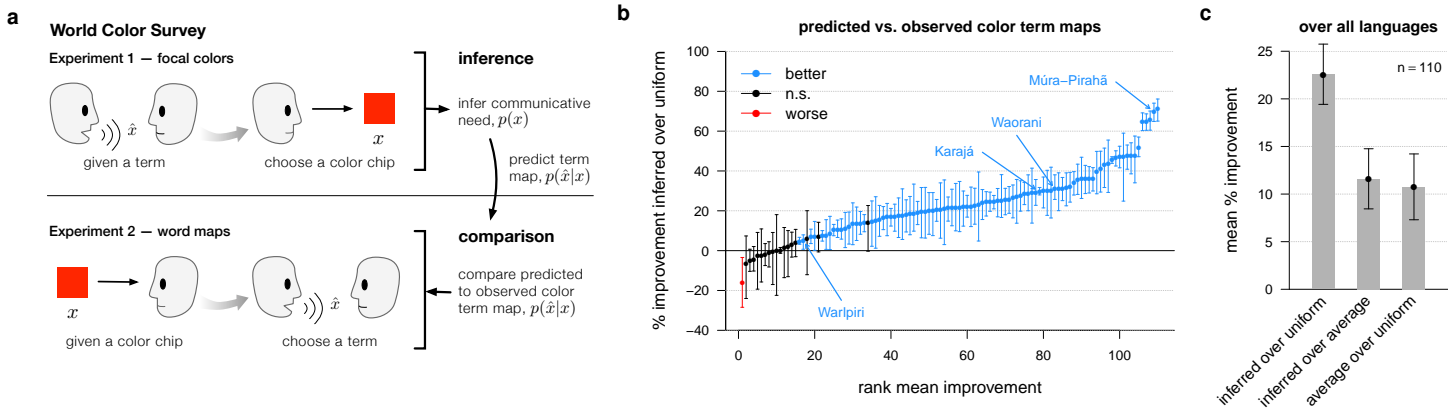

**Figure 3. Inference and prediction within the World Color Survey.** (a) The World Color Survey (WCS) [4] included two separate experiments with native speakers of each language. In this study we used only the WCS focal color experiment to infer the communicative needs of colors,  $p(x)$ , and to predict a language’s mapping from colors to terms,  $p(\hat{x}|x)$ . Without any additional fitting we then compared the predicted term maps to the empirical term maps observed in the second WCS experiment. (b) Predicted term maps tend to agree with the observed term maps (see Figure 2c; SI Fig. C2c). Moreover, the predicted term maps show better agreement with the empirical data than would predictions assuming a uniform distribution of communicative needs. The panel shows the rank ordered mean percentage improvement in predicted versus observed term maps using the inferred communicative need  $p(x)$  compared to a uniform communicative need, with 95% confidence intervals (bootstrap resampling, see Methods: Measuring distance between distributions over colors). Languages (points) colored black have 95% confidence intervals overlapping 0%; blue indicates significant improvement. Languages that do worse under the inferred distribution of needs (red points) violate model assumptions. (c) Over all languages, the mean percentage improvement (and 95% CIs) in predicted vocabularies when using language-specific communicative needs compared to uniform needs (“inferred over uniform”), language-specific versus average needs over all languages (“inferred over average”), and average versus uniform needs (“average over uniform”). Some improvement in predictive accuracy is attributable to commonalities in communicative needs across languages (third comparison), and yet more improvement is attributable to variation in needs among languages (second comparison).

259 We also compared communicative needs to spectral measure- 287  
 260 ments by Sumner & Mollon [38, 39] of unripe and ripe fruit in the 288  
 261 diets of catarrhine primates, which have trichromatic color vision 289  
 262 and spectral sensitivities similar to humans. When projected onto 290  
 263 the WCS color chips (see SI Fig. C6), unripe, midripe, and ripe 291  
 264 fruit occupy distinct regions of perceptual color space (Fig. 4c) 292  
 265 corresponding to low, medium, and high values of inferred com- 293  
 266 municative need, respectively (Fig. 4d). The morphological char- 294  
 267 acteristics of fruit, including color, are known to be adapted to the 295  
 268 sensory systems of frugivores that act as their seed dispersers, for 296  
 269 vertebrates in general [40–42] and primates in particular [43–45]. 297  
 270 And so our results support the hypothesis that shared communica- 298  
 271 tive needs in human cultures emphasize the colors of salient objects 299  
 272 that stand out or attract attention in our shared visual system across 300  
 273 a typical range of environments<sup>†</sup>. 301

### 274 Cross-cultural variation

275 Languages vary considerably in their needs to communicate about 302  
 276 different parts of color space (Fig. 5a; SI Fig. E11–E27). The in- 303  
 277 ferred needs for the language Waorani (Ecuador), for example, em- 304  
 278 phasize white and mid-value blues, while de-emphasizing yellows 305  
 279 and greens, relative to the average needs of all B&K+WCS lan- 306  
 280 guages. Whereas Martu-Wangka (Australia) emphasizes pinks and 307  
 281 mid-value reds, as well as a light greens, while de-emphasizing 308  
 282 blues and dark purples (Fig. 5a). In fact, the median distance 309  
 283 between language-specific communicative needs and the across- 310  
 284 language average needs is nearly as large as the distance between 311  
 285 the average needs and uniform needs (9.9 and 11.2, respectively, in 312  
 286 units of  $\Delta E^*$ ). 313  
 314  
 315

<sup>†</sup>Note that these results do not imply shared communicative needs are determined by the need to name fruit specifically.

Why do language communities vary in their needs to commu- 287  
 288 nicate different colors? Detailed study of this question requires 289  
 language-specific investigation beyond the scope of the present 290  
 work. However, we can at least measure how variation in linguis- 291  
 tic origin, geographic location, and local biogeography (Fig. 5b) 292  
 relate to differences in communicative needs. We quantified these 293  
 factors for pairs of languages by determining: (1) whether or not 294  
 they belong to the same linguistic family in *glottolog* [46]; (2) the 295  
 geodesic distance between communities of native speakers; and 296  
 (3) whether or not language communities share the same “ecore- 297  
 gion,” a measure of biogeography [47] that delineates boundaries 298  
 between terrestrial biodiversity patterns [48]. Our statistical anal- 299  
 ysis also controls for differences in the number of color terms 300  
 between languages, because we seek to understand cross-cultural 301  
 variation above and beyond any relationship between vocabulary 302  
 size and (inferred) communicative needs (SI Sec. C.3).

While language differences are largely idiosyncratic, we find a 303  
 small but measurable impact of distance and biogeography on com- 304  
 municative needs (Fig. 5c, Methods: Correlates of cross-cultural 305  
 differences in communicative need). In particular, increasing the 306  
 geodesic distance between language communities by a factor of 307  
 10 decreases the mean similarity in their communicative needs 308  
 by a factor of 2.9% ([1.7%, 4.2%] 95% CI), while sharing the 309  
 same ecoregion increases the mean similarity by a factor of 8.4% 310  
 ([3.9%, 12.7%] 95% CI). By contrast, we find no significant ef- 311  
 fect of language genealogy on communicative needs, at least at 312  
 the coarse scale of language family. Taken together, these results 313  
 suggest that color vocabularies are adapted to the local context of 314  
 language communities. 315

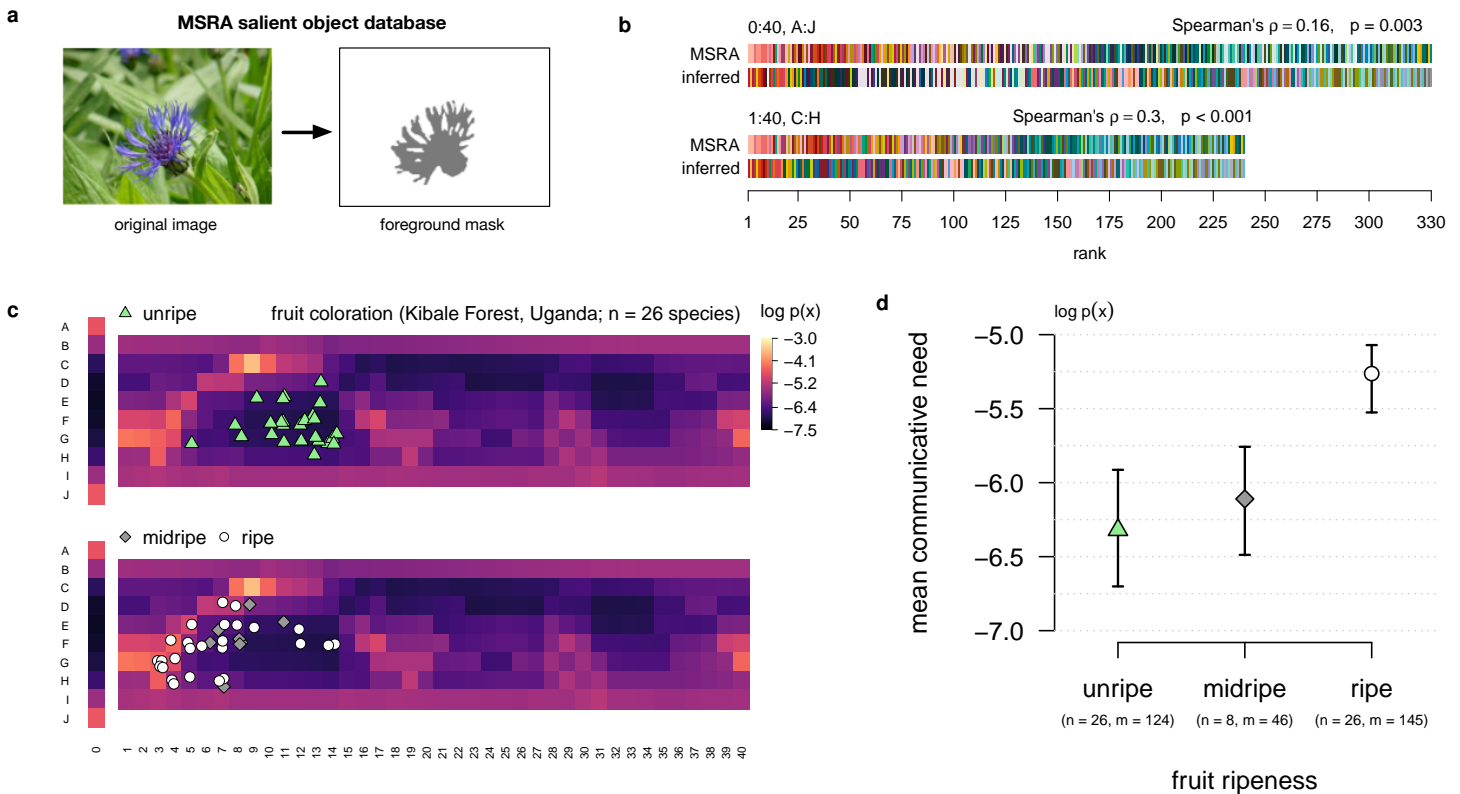

**Figure 4. Inferred distributions of communicative needs correlate with the colors of salient objects.** (a) Human participants in the Microsoft Research Asia (MSRA) salient object study were asked to identify the foreground object in 20,000 images; example foreground mask illustrated in gray. (b) WCS color chips ordered by their rank frequency in the foreground of MSRA images (rows “MSRA”; see Gibson et al. [3]), and in the inferred distribution of communicative need (rows “inferred”), averaged across the  $n = 130$  languages in the B&K+WCS survey data. There is a weak positive correlation between the colors that are considered salient, in the MSRA dataset, and the colors with greatest inferred communicative need, across all WCS color chips (*top*). This relationship is strengthened after removing achromatic chips (WCS column 0, rows B and I) from the comparison (*bottom*). (c) Colors of unripe (*top*), midripe, and ripe (*bottom*) fruit in the diets of catarrhine primates, derived from fruit spectral reflectance measurements collected in the Kibale Rainforest, Uganda, by Sumner & Mollon [38, 39]. The colors of ripe fruit tend to correspond with the colors of greatest inferred communicative need. (d) Average log-probability in the inferred distribution of communicative need of color corresponding to unripe, midripe, and ripe fruit.  $n$  denotes the number of fruit species, and  $m$  the total number of spectral measurements. Error bars show 95% confidence intervals of the means (nonparametric bootstrap by species).

## 316 Discussion

317 We have inferred language-specific needs to communicate about  
 318 different colors, using a novel algorithm that applies to any rate-  
 319 distortion Bregman clustering. Accounting for non-uniform needs  
 320 substantially improves our ability to predict color vocabularies  
 321 across 130 languages. Neither our predictions of term maps nor,  
 322 in contrast to prior work, our inferences of needs use empirical in-  
 323 formation on the mappings from colors to terms, allowing us to test  
 324 the compression model of color naming against independent data.

325 The distribution of communicative needs, averaged across lan-  
 326 guages, reflects a warm-to-cool gradient, as hypothesized in Gib-  
 327 son et al. [3]; and it is related to object salience more generally, as  
 328 indicated by the positioning of ripe fruit coloration in regions of  
 329 highest need. This is true even though the needs  $p(x)$  that we infer  
 330 by maximum entropy differ from the notion of communicative ef-  
 331 ficiency, or surprisal, used in prior work (SI Sec. C.6.1). We also  
 332 document extensive variation across languages in the demands on  
 333 different regions of color space, correlated with geographic loca-  
 334 tion and the local biogeography of language communities.

335 Our analysis provides clear support for the compression model  
 336 of color naming. Whereas prior work has established the role

of shared perceptual mechanisms for universal patterns in color  
 naming, our results highlight communicative need as a source of  
 cross-cultural variation that must be included for agreement with  
 empirical measurements. A catalogue of language-specific needs  
 (SI Fig. E11–E27) will enable future study into what drives cultural  
 demands on certain regions of color space, and how they relate to  
 contact rates between linguistic communities, shared cultural his-  
 tory, and local economic and ecological contexts. Our method-  
 ology also provides a theoretical framework and inference proce-  
 dure to study categorization in other cognitive domains, including  
 other perceptual domains of diverse importance worldwide [50],  
 and even in non-human cognitive systems that exhibit categoriza-  
 tion (e.g. Zebra finches [51, 52], the songbird *Taeniopygia guttata*).

Several languages have been advanced as possibly invalidating  
 the universality of color categories [53–55]. Languages are known  
 to vary in the degree to which different sensory domains are coded  
 [50, 56, 57], and in Pirahã and Warlpiri the existence of abstract  
 terms for colors has been disputed [58, 59]. Moreover, the color  
 vocabularies in Karajá and Waorani notably lack alignment with  
 the shape of perceptual color space [7]. Once we account for com-  
 municative needs, however, we find that the color terms of Karajá

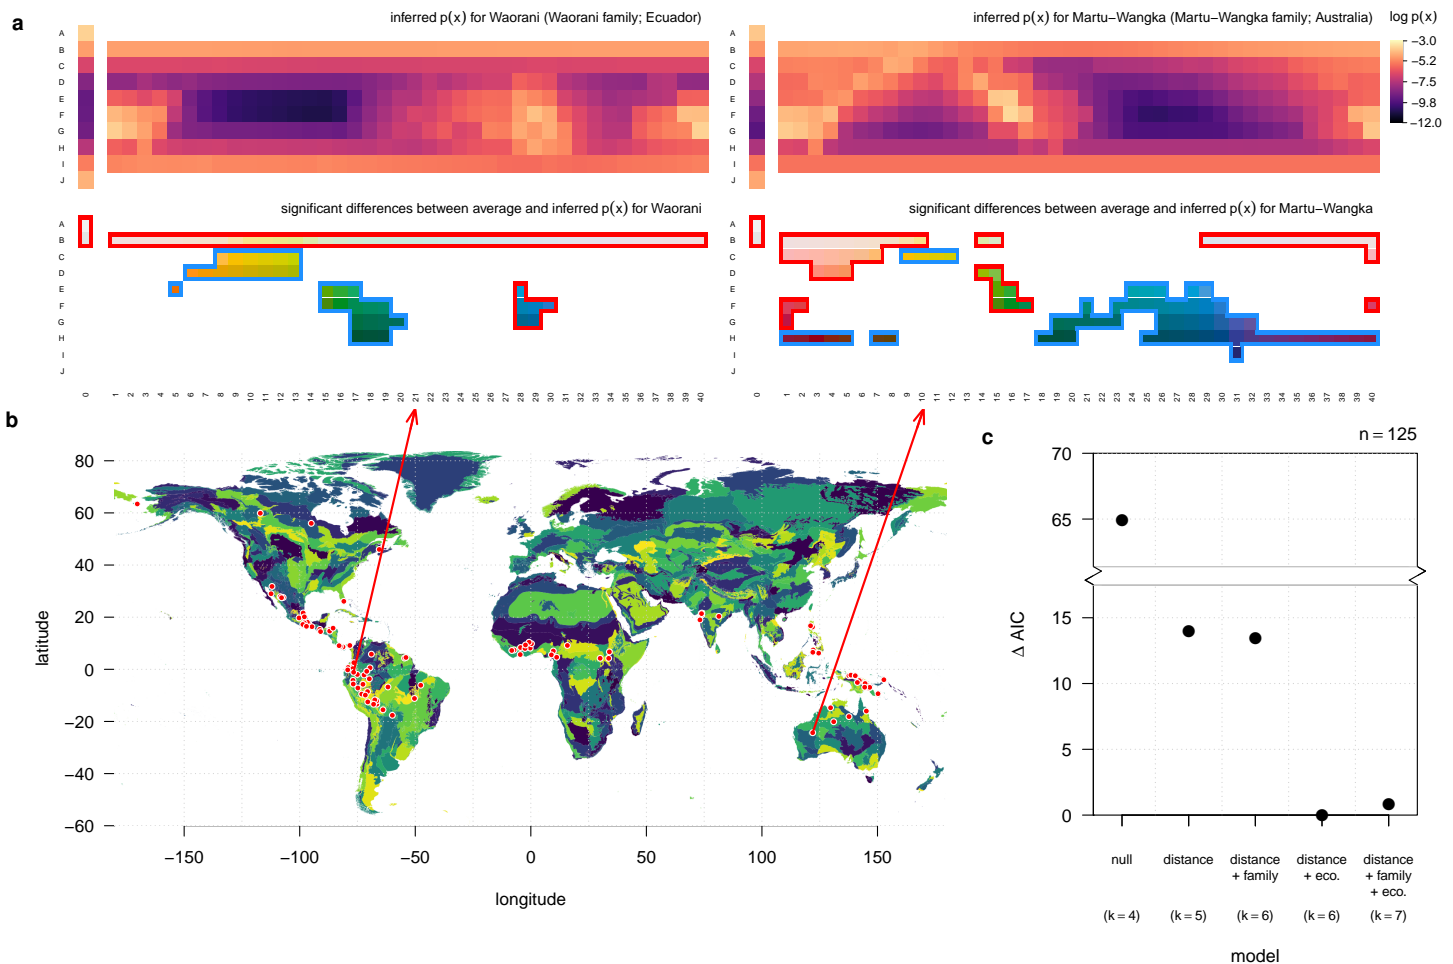

**Figure 5. The communicative needs of colors vary across languages, and they are correlated with geographic location and ecological region.** (a) The inferred distribution of communicative needs for two example languages (*top row*). For each language, many color chips have significantly elevated (red border) or suppressed (blue border) communicative need compared to the across-language average (*bottom row*; deviations that exceed  $\sigma/2$  with 95% confidence are highlighted in red or blue). (b) The approximate locations of WCS native language communities (red points) shown on a world map colored by eco-regions [47]. (c) Languages spoken in closer proximity to each other and sharing the same eco-region tend to have more similar inferred communicative needs (Type II Wald Chi-square tests;  $\chi^2 = 20.98$ ,  $df = 1$ ,  $p < 0.001$ ; and  $\chi^2 = 12.91$ ,  $df = 1$ ,  $p < 0.001$ , respectively), whereas shared language family does not have a significant effect ( $\chi^2 = 1.022$ ,  $df = 1$ ,  $p = 0.31$ ). Distance and shared eco-region each substantially improve the fit of generalized linear mixed effects models (GLMMs) predicting the distance between pairs of inferred communicative needs. GLMMs were fit using log-normal link function and a random-effects model designed for regression on distance matrices [49] (see Methods: Correlates of cross-cultural differences in communicative need).  $k$  denotes the total number of fixed and random effects in each model.

358 and Waorani are well explained by rate-distortion theory. Likewise, 359 while Pirahã may seem exceptional when assuming uniform com- 360 municative needs, we recover accurate predictions once accounting 361 for a non-uniform distribution of needs (Fig. 2c, Fig. 3b)<sup>†</sup>.

362 Nevertheless, several languages show little or no improvement in 363 predicted term maps using inferred versus uniform communicative 364 needs, and Warlpiri is among these cases. Before drawing conclu- 365 sions about exceptionalism, however, we note that several technical 366 assumptions of our analysis may be violated for these languages. 367 For one, we assumed that basic color terms are used with equal 368 frequency, to first approximation. This is a reasonable assumption 369 given that basic color terms are elicited with roughly equal fre- 370 quency under a free naming task in e.g. English [36]. Moreover, 371 the inferred distribution of needs for WCS and B&K languages are

<sup>†</sup>Although this does not imply that color terms in Pirahã are abstract necessarily; see Regier et al. [60].

372 relatively insensitive to non-uniformity of color term frequency, up 373 to variation by a factor 1.5 (SI Sec. C.2, SI Fig. C2d). Still, this 374 assumption may not be accurate enough for all languages, and the 375 frequencies of color terms requires future empirical study. Another 376 possibility is that the choice of the WCS stimuli themselves, i.e. the 377 set of Munsell chips,  $\mathcal{X}$ , may work well for identifying focal colors 378 of most languages, but may be too restrictive in the languages that 379 show little improvement. Future field and lab work could remedy 380 this by broadening the range of color stimuli used in surveys.

381 Another limitation of the WCS is variability in chroma across the 382 Munsell color chips used as stimuli, which might bias participants' 383 choice of focal color positions [25, 61–64]. While there is no rela- 384 tionship between chroma and language-specific communicative 385 needs (see SI Sec. C.6.2; SI Fig. C8b), we do find a small but sta- 386 tistically significant correlation (two-sided Spearman's  $\rho = 0.13$ , 387  $p = 0.019$ ,  $n = 330$ ) between chroma and the inferred distribution

of communicative need averaged across WCS languages. However, if this bias dominated the choice of focal colors in the WCS, then we would not expect distributions of need inferred from focal colors to improve predictions of color term maps. The fact that we do see substantial improvement suggests that whatever bias this effect may have, it is evidently not large enough to impact the relationship between focal color positions and color term maps for most languages. Nor would chromatic bias in stimuli explain the cross-cultural variation in communicative needs that we observe, since the set of stimuli was held constant across languages.

Our study has focused on how languages partition the vast space of perceivable colors into discrete terms, and how communicative needs shape this partitioning. Why some languages use more basic color terms than others remains an open topic for cross-cultural study. In principle, the issue of tolerance to imprecision in color communication is orthogonal to the distribution of communicative needs in a community. In practice, the number of color terms has a small impact on the resolution of inferred needs (SI Fig. C3a), which we control for in cross-cultural comparisons (SI Fig. C3b). Nonetheless, languages that have similar vocabulary sizes tend to have more similar communicative needs across colors, and this covariation is greater than any effect of vocabulary size on the resolution of our inferences (SI Fig. C3). These results suggest that causal factors driving vocabulary size may also influence a culture's communicative demands on colors – a hypothesis for future research.

Future empirical work may begin to unravel why cultures vary in their communicative demands on different regions of color space. It is already known that natural environments vary widely in their color statistics [65, 66] and this variation matters for color salience [67]. The need to reference certain objects, as well as their salience relative to similar backgrounds, may help explain why communities that share environments prioritize similar regions of color space, as we have seen. And so shared environment, physical proximity, and shared linguistic history at a finer scale than language family, are all plausible avenues for future study on the determinants of color demands. Beyond these factors, there remains substantial interest in cultural features that we have not studied here, including religion, agriculture, trade, access to pigments and dyes, and different ways of life, that can all shape a community's needs to refer to different colors, and the resulting language that emerges.

## Methods

### World Color Survey

Berlin & Kay [1] and Kay et al. [4] surveyed color naming in 130 languages around the world using a standardized set of color stimuli. The stimuli (Fig. 1a), a set of Munsell<sup>†</sup> color chips, were designed to cover the gamut of human perceivable colors at maximum saturation, across a broad range of lightness values. Native speakers were asked to choose among the basic color terms in their language to name each color chip, one at a time, in randomized order. The WCS study surveyed 25 native speakers in each of 110 small, pre-industrial language communities; the B&K study

<sup>†</sup>The Munsell color system was created as a means to index human perceivable color by hue, value, and chroma, at empirically measured perceptually uniform intervals along each dimension. In the WCS notation, rows correspond to equally spaced Munsell values, and columns 1–40 correspond to equally spaced Munsell hues. For column 0 Munsell chroma is 0; for all other columns Munsell chroma was chosen as the maximum for the given hue and value.

surveyed one native speaker in each of 20 languages from a mixture of both large (e.g. Arabic, English, and Mandarin) and comparatively small (e.g. Ibibio, Pomo, and Tzeltal) pre- and post-industrial societies.

The stimuli provided by the Munsell color chips are a function of the color pigmentation of the chips and the ambient light illuminating them. The ambient light source was approximately controlled by conducting the survey at noon and outdoors in shade, corresponding to CIE standard illuminant C. To the extent possible, participants were surveyed independently, although preventing the discussion of responses among participants was not always possible (discussed in Regier et al. [60]).

In our treatment of the color naming data, for each language we include all recorded terms that had an associated focal color, was used by at least two surveyed speakers (unless a B&K language, in which case only one speaker was surveyed), and was considered the best choice for at least one WCS color chip.

The 20 B&K languages were included in our analyses where appropriate: comparisons based on focal colors and inferred communicative needs. They were excluded from term map comparisons because the methods of estimating term maps differed methodologically from those in the WCS [68], and they do not provide straightforward estimates of  $p(\hat{x}|x)$ . In addition, B&K languages with significant geographic extent, e.g. Arabic and English, were excluded from statistical analysis of the correlates of cross-cultural differences in communicative needs, because estimating geographic distance or local biogeography would make little sense for these languages.

### RMSE of focal color predictions

Language-specific focal color positions were compared to model predictions using the root mean squared error (RMSE) between observation and prediction in units of CIE Lab  $\Delta E^*$ , computed for each WCS language  $i$  according to

$$\text{RMSE}_i \triangleq \left( \frac{1}{3n_i} \sum_{\hat{x} \in \hat{\mathcal{X}}_i} \sum_{j=1}^3 (\hat{\mathbf{x}}^{(j)} - \bar{\mathbf{x}}^{(j)})^2 \right)^{\frac{1}{2}}, \quad (4)$$

where the superscript ( $j$ ) specifies the coordinate in the CIE Lab color space of position vectors  $\hat{\mathbf{x}}$  and  $\bar{\mathbf{x}}$ , corresponding respectively to the predicted and empirically observed coordinates of the focal color for term  $\hat{x}$  in language  $i$ 's vocabulary,  $\hat{\mathcal{X}}_i$ . Here  $n_i = |\hat{\mathcal{X}}_i|$  denotes the number of basic color terms in language  $i$ 's vocabulary.

### Spectral measurements of ripening fruit

Spectral measurements of ripening fruit in the diets of catarrhine primates were obtained from the Cambridge database of natural spectra.<sup>‡</sup> Reflectance data for fruit taken from the Kibale Forest, Uganda, were converted to CIE XYZ 1931 color space coordinates using CIE standard illuminant C. We then converted points from XYZ to CIE Lab space using the XYZ values for CIE standard illuminant C (2° standard observer model) as the white point, in order to match the WCS construction of CIE Lab color chip coordinates. Calculations were performed in R (v3.6.3) using the package `colorscience` (v1.0.8).

Indicators of fruit ripeness include color, odor, and smell. Therefore, to measure visual salience we considered only fruit that had a discernable (in terms of CIE Lab  $\Delta E^*$ ) difference between unripe and ripe measurements (see Fig. C6a for determination of statistical threshold on change in chromaticity). For fruits with detectable changes in chromaticity, we projected their unripe, midripe, and ripe positions onto the WCS color chips such that absolute lightness,  $L^*$ , and the ratio of  $a^*$  to  $b^*$  was preserved (Fig. C6b).

### Measuring distance between distributions over colors

We quantified the perceptual difference between any two distributions over the WCS color chips in terms of their Wasserstein distance (used in Fig. 5c), defined as

$$W[p||q] \triangleq \min_{r(x,x') \in R} \sum_{x,x'} r(x,x') \| \mathbf{x} - \mathbf{x}' \|_2 \quad (5)$$

where  $R$  is the set of joint distributions satisfying  $\sum_x r(x,x') = p(x')$  and  $\sum_{x'} r(x,x') = q(x)$ . The CIE Lab coordinates of  $x$  and  $x'$  are given by  $\mathbf{x}$  and  $\mathbf{x}'$ , respectively, and the Euclidean distance between them approximates their perceptual dissimilarity, by design of the CIE Lab system. Under this measure, a small displacement in CIE Lab space of distributional emphasis is distinguishable from a large displacement. For example, for discrete distribution  $p(x) = \alpha$  if

<sup>‡</sup><http://vision.psychol.cam.ac.uk/spectra>



493  $x = x_p \in \mathcal{X}$ ,  $p(x) = (1 - \alpha)/(|\mathcal{X}| - 1)$  otherwise, let distribution  $q(x)$  be  
 494 defined identically except substituting  $x_q \in \mathcal{X}$  for  $x_p$ . Then the Wasserstein distance  
 495 between  $p$  and  $q$  will increase with the Euclidean distance between  $x_p$  and  
 496  $x_q$ , whereas e.g. the Kullback–Leibler divergence between  $p$  and  $q$  would remain  
 497 constant for any  $x_p \neq x_q$ .

498 We used a generalization of this distance measure to quantify the match between  
 499 predicted and measured term maps. To make this comparison we find the minimum-  
 500 CIE  $\Delta E^*$  partial matching between predicted and measured term map categories,  
 501  $p(\hat{x}|x)$ , for each term  $\hat{x}$  (used in Fig. 3b). To do this we find the minimum cost  
 502 achievable by any assignment of chips empirically labeled by  $\hat{x}$  to those predicted  
 503 to be labeled  $\hat{x}$ , weighted by the measured and predicted  $p(\hat{x}|x)$ . The best partial  
 504 matching accommodates for the fact that predicted and measured categories can  
 505 differ in total weight. This measure is known as the Earth mover’s distance [69]  
 506 (EMD), which has the Wasserstein distance as a special case with matching total  
 507 weights. Both measures were computed in R (v3.6.3) using the `emdist` (v0.3-  
 508 1) package.

## 509 Correlates of cross-cultural differences in communica- 510 tive need

511 We modeled the pairwise dissimilarity in communicative need between B&K+WCS  
 512 languages as a log-linear function of the geodesic distance between language  
 513 communities, shared linguistic family, and shared ecoregion, using a maximum-  
 514 likelihood population-effects model (MLPE) structure to account for the dependence  
 515 among pairwise measurements [49]. For languages  $j = 2, \dots, n$ ,  $i =$   
 516  $1, \dots, j - 1$ , we use a generalized linear mixed effects model with form

$$\eta^{(ij)} = \theta^T \mathbf{d}^{(ij)} + \tau_i + \tau_j, \quad (6)$$

$$\mathbf{d}^{(ij)} = \left[ 1, d_{\text{geo}}^{(ij)}, \delta_{\text{fam}}^{(ij)}, \delta_{\text{eco}}^{(ij)}, \Delta_{\text{terms}}^{(ij)} \right]^T, \quad (7)$$

$$\tau_1, \dots, \tau_n \sim \mathcal{N}(0, \sigma_\tau^2), \quad (8)$$

$$w^{(ij)} \sim \mathcal{N}(e^{\eta^{(ij)}}, \sigma_w^2), \quad (9)$$

517 where  $w^{(ij)}$  is the Wasserstein distance between the inferred distributions of commu-  
 518 nicative need for languages  $i$  and  $j$ ;  $d_{\text{geo}}^{(ij)}$  is their estimated geodesic distance  
 519 (Haversine method) in standardized (normalized by standard deviation) units  
 520 based on geographic coordinates in *glottolog* (and restricting to languages with  
 521 small geographic extent);  $\delta_{\text{fam}}^{(ij)}$  is a binary indicator of being in the same lin-  
 522 guistic family or not (1 or 0, respectively);  $\delta_{\text{eco}}^{(ij)}$  is a binary indicator of being  
 523 in the same ecoregion or not (1 or 0, respectively); and  $\Delta_{\text{terms}}^{(ij)}$  is the difference  
 524 in their number of color terms, which we include as a control. The random effects  
 525  $\tau_1, \dots, \tau_n$  model the dependence structure of the pairwise measurements. Model  
 526 diagnostics suggest reasonable behavior of residuals using a log-link function  
 527 (SI Fig. C7). Fitted coefficients indicate a positive increase in dissimilarity  
 528 with geodesic distance, and a decrease in dissimilarity with ecoregion, but no sig-  
 529 nificant effect of shared language family (SI Fig. C7). GLMM fits were performed  
 530 in R (v3.6.3) using the `lme4` (v1.1-21) package, with MLPE structure based on code  
 531 from `resistanceGA` [70]. Model diagnostics based on simulated residuals were  
 532 done using package `DHARMA` (v0.2.6).

533 Pseudo- $R^2$  measuring overall model fit was computed as  $R_{\text{cor}}^2 =$   
 534  $\text{cor}(w^{(ij)}, \hat{w}^{(ij)})^2$ , where  $\hat{w}^{(ij)}$  is the model predicted value for  $w^{(ij)}$ , based  
 535 on Zheng & Agresti [71]. For our model,  $R_{\text{cor}}^2 = 0.64$ . However, there  
 536 is no standard, single measure of  $R^2$  for models with mixed effects. A re-  
 537 cent proposal [72, 73] suggests reporting two separate quantities, a conditional  
 538 and marginal  $R^2$ , which can be interpreted as measuring the variance explained  
 539 by both fixed and random effects combined ( $R_{\text{GLMM(c)}}^2$ ), and the variance ex-  
 540 plained by fixed effects alone ( $R_{\text{GLMM(m)}}^2$ ). For our model we computed these as  
 541  $R_{\text{GLMM(c)}}^2 = (\sigma_\theta^2 + 2\sigma_\tau^2)/\sigma_{\text{total}}^2$  and  $R_{\text{GLMM(m)}}^2 = \sigma_\theta^2/\sigma_{\text{total}}^2$ , respectively, where  
 542  $\sigma_{\text{total}}^2 = \sigma_\theta^2 + 2\sigma_\tau^2 + \log\left(1 + \frac{\sigma_w^2}{(\mathbb{E}w)^2}\right)$  based on Nakagawa et al. [73]. For our  
 543 model, conditional  $R_{\text{GLMM(c)}}^2 = 43.3\%$  and marginal  $R_{\text{GLMM(m)}}^2 = 12.7\%$ . We  
 544 based the inclusion of fixed effects on AIC (Fig. 5c) following best practices for  
 545 MLPE models [74].

## 546 Data availability

547 All data came from pre-existing datasets. Color vocabulary data was sourced from  
 548 the World Color Survey online repository (<http://www1.icsi.berkeley.edu/wcs/data.html>). Additional language data was sourced through *glottolog*

v3.4, available online (<https://glottolog.org/meta/downloads>).  
 550 Data on biogeographic regions were provided by the World Wildlife Foundation,  
 551 available online (<https://www.worldwildlife.org/publications/terrestrial-ecoregions-of-the-world>). Fruit reflectance data came  
 552 from the Cambridge database of natural spectra, available online (<http://vision.psychol.cam.ac.uk/spectra>). Salient object data originating  
 553 from the Microsoft Research Asia (MSRA) dataset are not publicly available, but  
 554 were kindly provided to us on request by the corresponding authors of Gibson et al.  
 555 [3]. Data generated by our inference method and used to estimate the average com-  
 556 munitative needs across languages (Fig. 2a) and language specific communicative  
 557 needs (SI Fig. SI E11–E27) will be shared under a creative commons license and  
 558 made available on github.  
 559  
 560

## 561 Code availability

562 Custom code was developed to infer communicative needs using the algorithm de-  
 563 rived in this paper (SI Sec. B). All code will be made available as open source and  
 564 shared via github.  
 565

## 566 References

- 567 1. Berlin, B. & Kay, P. (1969) *Basic Color Terms: Their Universality and Evolu-*  
 568 *tion*. Univ. of California Press, Berkeley.
- 569 2. Regier, T., Kay, P., & Khetarpal, N. (2007) Color naming reflects optimal  
 570 partitions of color space. *PNAS*, **104**(4):1436–1441.
- 571 3. Gibson, E., Futrell, R., Jara-Ettinger, J., Mahowald, K., Bergen, L., Rat-  
 572 nasingam, S., Gibson, M., Piantadosi, S. T., & Conway, B. R. (2017) Color  
 573 naming across languages reflects color use. *PNAS*, **114**(40):10785–10790.
- 574 4. Kay, P., Berlin, B., Maaffi, L., Merrifield, W., & Cook, R. (2009) *The World*  
 575 *Color Survey*. CLSI, Stanford. ISBN 9781575864150.
- 576 5. Kay, P. & Regier, T. (2003) Resolving the question of color naming universals.  
 577 *PNAS*, **100**(15):9085–9089.
- 578 6. Kay, P. (2005) Color categories are not arbitrary. *Cross-Cult. Res.*, **39**(1):  
 579 39–55.
- 580 7. Regier, T., Kay, P., & Cook, R. (2005) Focal colors are universal after all.  
 581 *PNAS*, **102**(23):8386–8391.
- 582 8. Lindsey, D. T. & Brown, A. M. (2009) World color survey color naming reveals  
 583 universal motifs and their within-language diversity. *PNAS*, **106**(47):19785–  
 584 19790.
- 585 9. Yendrikhovskij, S. N. (2001) Computing color categories from statistics of  
 586 natural images. *J. Imaging Sci. Technol.*, **45**(5):409–417.
- 587 10. Komarova, N. L., Jameson, K. A., & Narens, L. (2007) Evolutionary models  
 588 of color categorization based on discrimination. *J. Math. Psychol.*, **51**(6):359–  
 589 382.
- 590 11. Zaslavsky, N., Kemp, C., Regier, T., & Tishby, N. (2018) Efficient compression  
 591 in color naming and its evolution. *PNAS*, **115**(31):7937–7942.
- 592 12. Webster, M. A., Miyahara, E., Malkoc, G., & Raker, V. E. (2000) Variations in  
 593 normal color vision. ii. unique hues. *J. Opt. Soc. Am. A*, **17**:1545–1555.
- 594 13. Scheffrin, B. E. & Werner, J. S. (1990) Loci of spectral unique hues throughout  
 595 the lifespan. *J. Opt. Soc. Am. A*, **7**(2):305–311.
- 596 14. Brainard, D. H., Roorda, A., Yamauchi, Y., Calderone, J. B., Metha, A., Neitz,  
 597 M., Neitz, J., Williams, D. R., & Jacobs, G. H. (2000) Functional consequences  
 598 of the relative number of l and m cones. *J. Opt. Soc. Am. A*, **17**:607–614.
- 599 15. Neitz, J., Carroll, J., Yamauchi, Y., Neitz, M., & Williams, D. (2002) Color per-  
 600 ception is mediated by a plastic neural mechanism that is adjustable in adults.  
 601 *Neuron*, **35**(4):783–792.
- 602 16. Kay, P. & McDaniel, C. K. (1978) The linguistic significance of the meanings  
 603 of basic color terms. *Language*, **54**(3):610–646.
- 604 17. Heider-Rosch, E. (1972) Universals in color naming and memory. *J. Exp.*  
 605 *Psychol. Gen.*, **93**(1):10–20.
- 606 18. Rosch, E. (1973) Natural categories. *Cog. Psychol.*, **4**(3):328–350.
- 607 19. Sun, R. K. (1983) Perceptual distances and the basic color term encoding  
 608 sequence. *Am. Anthropol.*, **85**(2):387–391.
- 609 20. MacLaury, R. E. (1987) Color-category evolution and shuswap yellow-with-  
 610 green. *Am. Anthropol.*, **89**(1):107–124.

- 611 21. MacLaury, R. E. (1992) From brightness to hue: an explanatory model of  
612 color-category evolution. *Curr. Anthropol.*, **33**(2):137–186.
- 613 22. Jameson, K. & D’Andrade, R. G. (1997) It’s not really red, green, yellow,  
614 blue: an inquiry into perceptual color space. In Hardin, C. L. & Maffi, L., editors,  
615 *Color Categories in Thought and Language*. Cambridge University Press,  
616 Cambridge, UK.
- 617 23. Webster, M. A. & Kay, P. Individual and population differences in focal col-  
618 ors. In MacLaury, R. E., Paramei, G. V., & Dedrick, D., editors, *Anthropology*  
619 *of Color: Interdisciplinary multilevel modeling*, pages 29–53, Amsterdam /  
620 Philadelphia, (2007). John Benjamins Publishing Company.
- 621 24. Gibson, E., Futrell, R., Piantadosi, S. P., Dautriche, I., Mahowald, K., Bergen,  
622 L., & Levy, R. (2019) How efficiency shapes human language. *Trends Cogn.*  
623 *Sci.*, **23**(5):389–407.
- 624 25. Conway, B. R., Ratnasingam, S., Jara-Ettinger, J., Futrell, R., & Gibson, E.  
625 (2020) Communication efficiency of color naming across languages provides a  
626 new framework for the evolution of color terms. *Cognition*, **195**:104086.
- 627 26. Shepard, R. N. (1992) The perceptual organization of colors: an adaptation to  
628 regularities of the terrestrial world? In Barkow, J., Cosmides, L., & Tooby, J.,  
629 editors, *Adapted Minds*, pages 495–532. Oxford University Press, Oxford, UK.
- 630 27. Zaslavsky, N., Kemp, C., Tishby, N., & Regier, T. (2018) Color naming reflects  
631 both perceptual structure and communicative need. *Cog. Sci.*, **11**(1):207–219.
- 632 28. Zaslavsky, N., Kemp, C., Tishby, N., & Regier, T. (2019) Communicative need  
633 in colour naming. *Cogn. Neuropsychol.*, **37**(5-6):312–324.
- 634 29. Shannon, C. E. (1948) A mathematical theory of communication. *Bell System*  
635 *Technical Journal*, **27**(3):379–423.
- 636 30. Shannon, C. E. (1959) Coding theorems for a discrete source with a fidelity  
637 criterion. *IRE National Convention Record*, **7**(4):142–163.
- 638 31. Cover, T. M. & Thomas, J. A. (2006) *Elements of information theory*. Wiley-  
639 Interscience, 2nd edition.
- 640 32. Sims, C. R. (2016) Rate-distortion theory and human perception. *Cognition*,  
641 **152**:181–198.
- 642 33. Kemp, C., Xu, Y., & Regier, T. (2018) Semantic typology and efficient com-  
643 munication. *Annu. Rev. Linguist.*, **4**(1):109–128.
- 644 34. Boynton, R. M. & Olson, C. X. (1987) Locating basic colors in the osa space.  
645 *Color Res. Appl.*, **12**(2):94–105.
- 646 35. Sturges, J. & Whitfield, T. W. A. (1995) Locating basic colours in the munsell  
647 space. *Color Res. Appl.*, **20**(6):364–376.
- 648 36. Lindsey, D. T. & Brown, A. M. (2014) The color lexicon of american english.  
649 *J. Vision*, **14**(2):17, 1–25.
- 650 37. Liu, T., Sun, J., Zhen, N.-N., Tang, X., & Shum, H.-Y. Learning to detect a  
651 salient object. In *IEEE Conference on Computer Vision and Pattern Recogni-*  
652 *tion*, Minneapolis, MN, USA, (2007). doi: 10.1109/CVPR.2007.383047.
- 653 38. Sumner, P. & Mollon, J. D. (2000) Catarrhine photopigments are optimized  
654 for detecting targets against a foliage background. *J. Exp. Biol.*, **203**(13):1963–  
655 1986.
- 656 39. Sumner, P. & Mollon, J. D. (2000) Chromaticity as a signal of ripeness in fruits  
657 taken by primates. *J. Exp. Biol.*, **203**(13):1987–2000.
- 658 40. Lomáscolo, S. B., Levey, D. J., Kimball, R. T., Bolker, B. M., & Alborn, H. T.  
659 (2010) Dispersers shape fruit diversity in *Ficus* (moraceae). *PNAS*, **107**(33):  
660 14668–14672.
- 661 41. Nevo, O., Valenta, K., Razafimandimby, D., Melin, A. D., Ayasse, M., & Chap-  
662 man, C. A. (2018) Frugivores and the evolution of fruit colour. *Biol. Lett.*, **14**  
663 (9). doi: 10.1098/rsbl.2018.0377.
- 664 42. Valenta, K. & Nevo, O. (2020) The dispersal syndrome hypothesis: how ani-  
665 mals shaped fruit traits, and how they did not. *Funct. Ecol.* doi: 10.1111/1365-  
666 2435.13564.
- 667 43. Regan, B. C., Julliot, C., Simmen, B., Viénot, F., Charles-Dominique, P., &  
668 Mollon, J. D. (1998) Frugivory and colour vision in *Alouatta seniculus*, a  
669 trichromatic platyrrhine monkey. *Vision Res.*, **38**(21):3321–3327.
- 670 44. Regan, B. C., Julliot, C., Simmen, B., Viénot, F., Charles-Dominique, P., &  
671 Mollon, J. D. (2001) Fruits, foliage and the evolution of primate colour vision.  
672 *Phil. Trans. R. Soc. Lond. B*, **356**(1407):229–283.
- 673 45. Onstein, R. E., Vink, D. N., Veen, J., Barratt, C. D., Flantua, S. G. A., Wich,  
674 S. A., & Kissling, W. D. (2020) Palm fruit colours are linked to the broad-scale  
distribution and diversification of primate colour vision systems. *Proc. R. Soc.*  
*B*, **287**(1921). doi: 10.1098/rspb.2019.2731.
- 675 46. Hammarström, H., Forkel, R., Haspelmeth, M., & Bank, S. Glottolog 4.2.1.  
676 Max Planck Institute for the Science of Human History, (2020). URL <https://glottolog.org>.
- 677 47. Olson, D. M., Dinerstein, E., Wikramanayake, E. D., Burgess, N. D., Powell,  
678 G. V. N., Underwood, E. C., D’Amico, J. A., Itoua, I., Strand, H. E., Morrison,  
679 J. C., Loucks, C. J., Allnutt, T. F., Ricketts, T. H., Kura, Y., Lamoreaux, J. F.,  
680 Wettengel, W. W., Hedao, P., & Kassem, K. R. (2001) Terrestrial ecoregions of  
681 the world: a new map of life on earth. *Bioscience*, **51**(11):933–938.
- 682 48. Smith, J. R., Letten, A. D., Ke, P.-J., B., A. C., Hendershot, J. N., Dhami,  
683 M. K., Dlott, G. A., Grainger, T. N., Howard, M. E., Morrison, B. M., Routh,  
684 D., San Juan, P. A., Mooney, H. A., Mordecai, E. A., Crowther, T. W., & Daily,  
685 G. C. (2018) A global test of ecoregions. *Nat. Ecol. Evol.*, **2**:1889–1896.
- 686 49. Clarke, R. T., Rothery, P., & Raybould, A. F. (2002) Confidence limits for  
687 regression relationships between distance matrices: estimating gene flow with  
688 distance. *J. Agric. Biol. Envir. S.*, **7**(3):361–372.
- 689 50. Majid, A., Roberts, S. G., Cilissen, L., Emmorey, K., Nicodemus, B., O’Grady,  
690 L., Woll, B., LeLan, B., de Sousa, H., Cansler, B. L., Shayan, S., de Vos, C.,  
691 Senft, G., Enfield, N. J., Razak, R. A., Fedden, S., Tuvfesson, S., Dingemane,  
692 M., Ozturk, O., Brown, P., Hill, C., Le Guen, O., Hirtzel, V., van Gijn R.,  
693 Sicoli, M. A., & Levinson, S. C. (2018) Differential coding of perception in  
694 the world’s languages. *PNAS*, **115**(45):11369–11376.
- 695 51. Caves, E. M., Green, P. A., Zipple, M. N., Peters, S., Johnsen, S., & Nowicki,  
696 S. (2018) Categorical perception of colour signals in a songbird. *Nature*, **560**  
697 (7718):365–367.
- 698 52. Zipple, M. N., Caves, E. M., Green, P. A., Peters, S., Johnsen, S., & Nowicki,  
699 S. (2019) Categorical colour perception occurs in both signalling and non-  
700 signalling colour ranges in a songbird. *Proc. R. Soc. B*, **286**(1903). doi: 10.  
701 1098/rspb.2019.0524.
- 702 53. Davidoff, J., Davies, I., & Roberson, D. (1999) Colour categories in a stone-age  
703 tribe. *Nature*, **398**(6724):203–204.
- 704 54. Roberson, D. & Davidoff, J. (2000) Color categories are not universal: repli-  
705 cations and new evidence from a stone-age culture. *J. Exp. Psychol.*, **129**(3):  
706 369–398.
- 707 55. Roberson, D., Davidoff, J., Davies, I. R. L., & Shapiro, L. R. (2005) Color  
708 categories: evidence for the cultural relativity hypothesis. *Cogn. Psychol.*, **50**  
709 (4):378–411.
- 710 56. Majid, A. & Kruspe, N. (2018) Hunter-gatherer olfaction is special. *Curr. Biol.*,  
711 **28**(3):409–413.
- 712 57. Majid, A., Burenhult, N., Stensmyr, M., de Valk, J., & Hansson, B. S. (2018)  
713 Olfactory language and abstraction across cultures. *Phil. Trans. R. Soc. B*, **373**  
714 (1752):20170139.
- 715 58. Everett, D. L. (2005) Cultural constraints on grammar and cognition in pirahã:  
716 another look at the design features of human language. *Curr. Anthropol.*, **46**  
717 (4):621–646.
- 718 59. Wierzbicka, A. (2008) Why there are no ‘colour universals’ in language and  
719 thought. *J. R. Anthropol. Inst.*, **14**(2):407–425.
- 720 60. Regier, T., Kay, P., & Khetarpal, N. (2009) Color naming and the shape of  
721 color space. *Language*, **85**(4):884–892.
- 722 61. Lindsey, D. T., Brown, A. M., Brainard, D. H., & Apicella, C. L. (2015)  
723 Hunter-gatherer color naming provides new insight into the evolution of color  
724 terms. *Curr. Biol.*, **25**(18):2441–2446.
- 725 62. Witzel, C. (2016) New insights into the evolution of color terms or an effect of  
726 saturation? *i-Perception*, **7**(5). doi: 10.1177/2041669516662040.
- 727 63. Lindsey, D. T., Brown, A. M., Brainard, D. H., & Apicella, C. L. (2016) Hadza  
728 color terms are sparse, diverse, and distributed, and presage the universal color  
729 categories found in other world languages. *i-Perception*, **7**(6). doi: 10.1177/  
730 2041669516681807.
- 731 64. Witzel, C. (2019) Variation of saturation across hue affects unique and typical  
732 hue choices. *i-Perception*, **10**(5). doi: 10.1177/2041669519872226.
- 733 65. Webster, M. A. & Mollon, J. D. (1997) Adaptation and the color statistics of  
734 natural images. *Vision Res.*, **37**:3283–3298.
- 735 66. Webster, M. A., Mizokami, Y., & Webster, S. A. (2007) Seasonal variations in  
736 the color statistics of natural images. *Network-Comp. Neural.*, **18**(3):213–233.
- 737 738 739

- 740 67. McDermott, K. C., Malkoc, G., Mulligan, J. B., & Webster, M. A. (2010)  
741 Adaptation and visual salience. *J. Vis.*, **10**(13). doi: 10.1167/10.13.17.
- 742 68. Kay, P., Berlin, B., Maffi, L., & Merrifield, W. (1997) Color naming across  
743 languages. In Hardin, C. L. & Maffi, L., editors, *Color categories in thought*  
744 *and language*, pages 21–56. Cambridge University Press, Cambridge. ISBN  
745 9780521498005.
- 746 69. Rubner, Y., Tomasi, C., & Guibas, L. J. A metric for distributions with applica-  
747 tions to image databases. In *IEEE Sixth International Conference on Computer*  
748 *Vision*, pages 59–66, Bombay, India, (1998).
- 749 70. Peterman, W. E. (2018) ResistanceGA: An R package for the optimization of  
750 resistance surfaces using genetic algorithms. *Methods Ecol. Evol.*, **9**(6):1638–  
751 1647.
- 752 71. Zheng, B. & Agresti, A. (2000) Summarizing the predictive power of a gener-  
753 alized linear model. *Statist. Med.*, **19**(13):1771–1781.
- 754 72. Nakagawa, S. & Schielzeth, H. (2013) The coefficient of determination  $R^2$  and  
755 intra-class correlation coefficient from generalized linear mixed-effects models  
756 revisited and expanded. *Methods Ecol. Evol.*, **4**(2):133–142.
- 757 73. Nakagawa, S., Johnson, P. C. D., & Schielzeth, H. (2017) The coefficient of  
758 determination  $R^2$  and intra-class correlation coefficient from generalized linear  
759 mixed-effects models revisited and expanded. *J. R. Soc. Interface*, **14**(134). doi:  
760 10.1098/rsif.2017.0213.
- 761 74. Row, J. R., Knick, S. T., Oyler-McCance, S. J., Loughheed, S. C., & Fedy,  
762 B. C. (2017) Developing approaches for linear mixed modeling in landscape  
763 genetics through landscape-directed dispersal simulations. *Ecol. Evol.*, **7**(11):  
764 3751–3761.

## 765 Supplementary Information

### 766 A Rate-distortion theory

767 Rate-distortion theory [1, 2] provides a mathematical treatment of the problem of lossy compression, based on  
768 information-theoretic quantities. In information theory [1], the entropy of a discrete random variable,  $X$ , defined

$$H(X) \triangleq \sum_{x \in \mathcal{X}} p(x) \log \frac{1}{p(x)}, \quad (10)$$

769 provides a measure of the average length of the shortest description (“amount of information”) needed to specify the  
770 outcome of random variable  $X$  with outcomes in the set  $\mathcal{X}$  occurring with probability  $p(x)$ . The joint entropy of  $X$   
771 and a second random variable,  $Y$ ,  $H(X, Y)$ , is defined similarly in terms of the joint distribution of  $X$  and  $Y$ ,  $p(x, y)$ ,  
772 and measures the average length of the shortest description needed to specify the outcomes of both random variables  
773 together. When the outcome of  $X$  is related to the outcome of  $Y$  in some (possibly nonlinear and stochastic) way, then  
774 the shortest description of both  $X$  and  $Y$  together may be smaller than the shortest descriptions of each of  $X$  and  $Y$   
775 separately. In general,  $H(X, Y) \leq H(X) + H(Y)$ , with equality if and only if  $X$  and  $Y$  are statistically independent.  
776 The mutual information between  $X$  and  $Y$ , defined,

$$I(X; Y) \triangleq H(X) + H(Y) - H(X, Y), \quad (11)$$

777 then gives a non-negative measure of the average amount of information  $X$  and  $Y$  contain about each other, which is  
778 nonzero if and only if  $X$  and  $Y$  are not independent.

779 In the lossy-compression context, for a given source (random variable)  $X$  and a description of that source,  $\hat{X}$ , the  
780 mutual information  $I(X; \hat{X})$  measures the amount of information the description contains about  $X$ , and it is this  
781 quantity we wish to minimize for compression, subject to a loss function, i.e. a measure of distortion. This can be  
782 formalized as

$$R(D) = \min_{p(\hat{x}|x) : \mathbb{E}d(x, \hat{x}) \leq D} I(X; \hat{X}), \quad (12)$$

783 where the loss is measured in terms of an expected distortion,  $\mathbb{E}d(x, \hat{x}) = \sum_{x \in \mathcal{X}} \sum_{\hat{x} \in \hat{\mathcal{X}}} p(\hat{x}|x) p(x) d(x, \hat{x})$ , with  $p(x)$   
784 a property of the source, and  $p(\hat{x}|x)$  the mapping of  $x$  to  $\hat{x}$  chosen to achieve on average the smallest description size  
785 possible,  $R(D)$ , for a given allowable average distortion,  $D$ . Intuitively, the minimum compressed description size,  
786  $R(D)$ , increases as the allowable average distortion,  $D$ , decreases, dependent on the details of the source,  $X$ , and loss  
787 function,  $d$ .

#### 788 A.1 Bregman clustering

789 The classical formulation of the rate-distortion tradeoff gives an optimal mapping of  $X$  to  $\hat{X}$  for fixed  $d(x, \hat{x})$ . When  
790 every  $x$  and  $\hat{x}$  has coordinates in a vector space, denoted  $\mathbf{x}$  and  $\hat{\mathbf{x}}$ , respectively, then for a large family of distortion  
791 measures known as Bregman divergences, optimal coordinates for each  $\hat{\mathbf{x}}$  can be found [3] in addition to the optimal  
792 mapping between  $X$  and  $\hat{X}$ . For Bregman divergence  $d_\phi(\mathbf{x}||\hat{\mathbf{x}})$ , defined

$$d_\phi(\mathbf{x}||\hat{\mathbf{x}}) \triangleq \phi(\mathbf{x}) - \phi(\hat{\mathbf{x}}) - \langle \mathbf{x} - \hat{\mathbf{x}}, \nabla_\phi(\hat{\mathbf{x}}) \rangle, \quad (13)$$

793 with convex function  $\phi$ , gradient  $\nabla_\phi(\hat{\mathbf{x}})$  evaluated at  $\hat{\mathbf{x}}$ , and inner product denoted  $\langle \cdot, \cdot \rangle$ , the centroid of the mapping  
794 from  $\hat{X}$  to  $X$  is the minimizer of the average distortion for  $\hat{x}$ , i.e.

$$\mathbb{E}_{p(x|\hat{x})} \mathbf{x} = \arg \min_{\hat{\mathbf{x}}} \mathbb{E}_{p(x|\hat{x})} d_\phi(\mathbf{x}||\hat{\mathbf{x}}). \quad (14)$$

795 Solutions to rate-distortion Bregman clustering (RDBC) problems have the property that each  $\hat{\mathbf{x}}$  satisfies Eq. 14.



## 796 A.2 Compression model of color naming

797 The first RDBC model of color naming appears in work by Yendrikhovskij [4]. Using a perceptual measure of distortion, Yendrikhovskij [4] worked to show that efficient solutions to a tradeoff between average perceptual distortion and  
798 vocabulary size account for color categories based on natural image statistics. While the results are likely sensitive to  
799 the exact, unreported choices of natural images used to produce the image statistics [5], the conceptual link to a rate-  
800 distortion tradeoff has proved significantly productive. Using essentially the same RDBC-based compression model  
801 but disregarding scene statistics, instead using the neurophysiological constraints of perceptual discrimination and  
802 gamut alone, Regier et al. [6] showed that the compression model of color naming can qualitatively explain many of  
803 the typical vocabularies of natural languages in the WCS. Subsequent work by Zaslavsky et al. [7] investigated a “soft”  
804 partitioning variant of this same conceptual framework (although with additionally a mixture of Gaussians based mea-  
805 sure of distortion derived from a Bayesian listener model of color naming), allowing for uncertainty in the mapping  
806 between terms and colors. In all cases, implicitly or explicitly, we can equivalently restate these compression-based  
807 accounts of color naming in terms of RDBC.  
808

## 809 A.3 Focal colors as category centroids

810 In the World Color Survey, participants were asked to identify among the WCS color chips the “best example” of each  
811 basic color term identified in their vocabulary. In the WCS instructions to scientists conducting the field work, this  
812 is intended to elicit a response in the participant that identifies a color chip that “... is a good, typical, or ideal...”<sup>†</sup>  
813 example of a given color term. In this work, we hypothesize that focal colors are observations of the centroids defined  
814 by Eq. 14. Two objections to this hypothesis immediately arise.

815 First, past work has shown that empirical measurements of category centroids differ from focal point positions  
816 [8–10], which would seem to invalidate our hypothesis. However, the discrepancy can be resolved by understanding  
817 how past work measured category centroids. Sturges and Whitfield [9], following earlier work by Boynton and Olson  
818 [8], conducted a color naming experiment similar to the WCS but in controlled laboratory conditions (and for English  
819 speakers only). Similar to the WCS, participants were asked to name, one by one in randomized sequence, a presented  
820 color chip, recording both the response as well as the timing of the response. The chips with shortest response times  
821 were considered the focal colors, and despite the difference in method these appear to be in good agreement with the  
822 “best example” focal colors recorded by Berlin & Kay for English speakers.

823 For each participant, the centroid of a category was computed as the average of all the color chips (in a given  
824 color space) that the participant named with that category’s color term (e.g. “red,” “green,” etc.). To write this out  
825 mathematically, we have a sequence of participant responses,  $\hat{x}^{(1)}, \hat{x}^{(2)}, \dots, \hat{x}^{(n)}$ , where each response is a color  
826 term, i.e.  $\hat{x}^{(i)} \in \hat{\mathcal{X}}$ , elicited by an experimenter presented color chip,  $x^{(1)}, x^{(2)}, \dots, x^{(n)}$ , where  $x^{(i)} \in \mathcal{X}$ . Note that  
827 each color chip in  $\mathcal{X}$  was presented more than once in the sequence of  $n$  presentations. Then the centroid for category  
828  $\hat{x}$  was computed as

$$\text{centroid}(\hat{x}) = \frac{1}{\sum_{i=1}^n \mathbf{1}(\hat{x}^{(i)} = \hat{x})} \sum_{i=1}^n \mathbf{x}^{(i)} \mathbf{1}(\hat{x}^{(i)} = \hat{x}), \quad (15)$$

829 where  $\mathbf{1}(\cdot)$  is the indicator function equal to 1 if its argument is true and 0 otherwise, and  $\mathbf{x}^{(i)}$  gives the coordinates of  
830 color  $x^{(i)}$  in color space. Let  $n(\hat{x}|x) = \sum_{i=1}^n \mathbf{1}(\hat{x}^{(i)} = \hat{x}) \mathbf{1}(x^{(i)} = x)$  count the occurrences of  $\hat{x}$  given presentation  
831 of color chip  $x$ , then we have

$$\text{centroid}(\hat{x}) = \frac{1}{\sum_x n(\hat{x}|x)} \sum_x \mathbf{x} n(\hat{x}|x). \quad (16)$$

832 Let  $n(x) = \sum_{i=1}^n \mathbf{1}(x^{(i)} = x)$  count the occurrences of  $x$  in the sequence. Then  $n(\hat{x}|x) \leq n(x)$ , and  $p(\hat{x}|x) =$   
833  $n(\hat{x}|x)/n(x)$  gives the fraction of times  $\hat{x}$  was used to name  $x$ , out of a total of  $n(x)$  occurrences. Since each color

<sup>†</sup><http://www1.icsi.berkeley.edu/wcs/data.html>

834 chip was presented the same number of times, we have further that  $n(x) = m$ . Then we have equivalently

$$\text{centroid}(\hat{x}) = \frac{1}{m \sum_x p(\hat{x}|x)} \sum_x \mathbf{x} p(\hat{x}|x) m, \quad (17)$$

$$= \frac{1}{\sum_x p(\hat{x}|x)} \sum_x \mathbf{x} p(\hat{x}|x). \quad (18)$$

835 Lastly, note that  $\sum_x p(\hat{x}|x) = p(\hat{x}) n_{\mathcal{X}}$ , where  $n_{\mathcal{X}}$  is the total number of color chips used, i.e. the cardinality of  $\mathcal{X}$ ,  
836 and  $p(\hat{x})$  is the fraction of occurrences of  $\hat{x}$  in the sequence. Thus we have

$$\text{centroid}(\hat{x}) = \frac{1}{n_{\mathcal{X}}} \frac{1}{p(\hat{x})} \sum_x \mathbf{x} p(\hat{x}|x), \quad (19)$$

837 which by Bayes rule is equivalent to our definition of centroid with a uniform distribution of communicative need over  
838 the color chips, i.e.  $p(x) = 1/n_{\mathcal{X}}$ . Thus in past work centroids have been shown to differ from focal colors *when*  
839 *a uniform distribution of communicative need over color chips is assumed*. In this paper, by contrast, we show that  
840 by inferring and using a non-uniform distribution of communicative need we better predict both empirical color term  
841 maps and focal point positions, and that focal point positions coincide with category centroids under this non-uniform  
842 distribution of needs.

843 The second objection stems from work done by Abbott et al. [11] investigating a measure of the “representativeness”  
844 of focal colors based on color category extents for the WCS. Representative colors of a given category are not necessar-  
845 ily those with the highest likelihood, i.e. maximizing  $p(x|\hat{x})$ , but instead are the most likely relative to their likelihood  
846 given any other category, weighted by the prior of that category, i.e. maximizing  $p(x|\hat{x}) / \sum_{\hat{x}' \neq \hat{x}} p(x|\hat{x}') p(\hat{x}')$ . This  
847 appears problematic for the hypothesis that category centroids are equivalent to focal points, due to the bijection  
848 between Bregman divergences and regular exponential family distributions, and the equivalence between Bregman  
849 divergence minimization and maximum likelihood estimation [3, 12]. Again, it is crucial to examine definitions to  
850 see that the discrepancy is resolved by the assumption placed on the form of  $p(x|\hat{x})$ . In Abbott et al. [11]  $p(x|\hat{x})$  was  
851 assumed to be normally distributed. Whereas under the compression hypothesis, the maximum likelihood is taken over  
852 the mixture model as a whole, and the form of  $p(x|\hat{x}) = p(\hat{x}|x)p(x)/p(\hat{x})$  is not normally distributed in general. The  
853 broader message of Abbott et al. [11] is that focal color positions reflect a balance between typicality within a category  
854 and distinction from other categories; and this interpretation agrees with our identification of focal colors as category  
855 centroids when category centroids “compete” to represent different parts of color space, as in the compression model  
856 of color naming.

## 857 B Inverse inference of source distribution

858 In this section we address the general problem of inferring an unknown source distribution,  $p(x)$ , from knowledge of  
859 its compressed representation (i.e. a representation  $\hat{X}$  that lies on the rate-distortion curve for some unknown value of  
860 the tradeoff parameter,  $\beta$ ). Concretely, we wish to find the  $q(x)$  that best approximates the unknown distribution  $p(x)$   
861 using only what we know about  $p(\hat{x})$  and  $\hat{\mathbf{x}}$  from its compressed representation, with no other assumptions. For fixed  
862 marginal distribution  $p(\hat{x})$  over  $\hat{\mathcal{X}}$ , this can naturally be expressed as a problem of finding the conditional distributions  
863  $q(x|\hat{x})$  that together maximize the entropy of the marginal distribution  $q(x) = \sum_{\hat{x}} q(x|\hat{x}) p(\hat{x})$  over  $\mathcal{X}$ , subject to a set  
864 of constraints that enforces we recover the known compressed representation, i.e.

$$\max_{q(x|\hat{x}) : \forall \hat{x} \in \hat{\mathcal{X}}, d(\tilde{\mathbf{x}}|\hat{\mathbf{x}}) = 0} H(X), \quad (20)$$

865 where  $H(X)$  is the Shannon entropy of  $X$  and  $\tilde{\mathbf{x}} = \sum_x \mathbf{x} q(x|\hat{x})$ .

866 We show that a numerical solution to this problem can be found via an alternating minimization strategy used by  
867 Blahut and Arimoto in their solutions to the channel maximization and rate-distortion problems [13, 14] and later  
868 generalized by Csiszár & Tusnády [15]. To do so, we first note that the objective function can be rewritten as

$$\max_{q(x|\hat{x}) \in Q} I(X; \hat{X}) + H(X|\hat{X}), \quad (21)$$

869 using the fact that  $I(X; \hat{X}) = H(X) - H(X|\hat{X})$ . Here  $Q$  is the set of all conditional probability distributions such  
 870 that  $d(\tilde{\mathbf{x}}|\hat{\mathbf{x}}) = 0$  for all  $\hat{x} \in \hat{\mathcal{X}}$ . Since the mutual information term can be written as a maximization over  $q(\hat{x}|x)$ ,  
 871 [13, 14] i.e.

$$I(X; \hat{X}) = \max_{q(\hat{x}|x)} \sum_x \sum_{\hat{x}} q(x|\hat{x})p(\hat{x}) \log \frac{q(\hat{x}|x)}{p(\hat{x})}, \quad (22)$$

872 and  $H(X|\hat{X}) = -\sum_x \sum_{\hat{x}} q(x|\hat{x})p(\hat{x}) \log q(x|\hat{x})$  is constant with respect to varying  $q(\hat{x}|x)$ , we can rewrite our  
 873 objective function as a double maximization of the function

$$J[q(x|\hat{x}), q(\hat{x}|x)] = I(X; \hat{X}) + H(X|\hat{X}) \quad (23)$$

$$= \sum_x \sum_{\hat{x}} q(x|\hat{x})p(\hat{x}) \log \frac{q(\hat{x}|x)}{p(\hat{x})} - \sum_x \sum_{\hat{x}} q(x|\hat{x})p(\hat{x}) \log q(x|\hat{x}), \quad (24)$$

$$= \sum_x \sum_{\hat{x}} q(x|\hat{x})p(\hat{x}) \log \frac{q(\hat{x}|x)}{q(x|\hat{x})p(\hat{x})}, \quad (25)$$

874 to change the problem into one of alternating maximizations over  $q(x|\hat{x})$  and  $q(\hat{x}|x)$ , i.e.

$$\max_{q(x|\hat{x}) \in Q} \max_{q(\hat{x}|x)} J[q(x|\hat{x}), q(\hat{x}|x)]. \quad (26)$$

875 The inner maximization over  $q(\hat{x}|x)$  for constant  $q(x|\hat{x})$  is given by  $q(\hat{x}|x) = \frac{q(x|\hat{x})p(\hat{x})}{\sum_{\hat{x}} q(x|\hat{x})p(\hat{x})}$ , as previously shown  
 876 by Blahut and Arimoto. The outer maximization over  $q(x|\hat{x})$  must respect a set of constraints that ensure we recover  
 877  $\hat{\mathbf{x}}$  as a minimum distortion representation of  $\mathbf{x}$  and that we have a valid probability distribution, i.e.

$$\begin{cases} d(\tilde{\mathbf{x}}|\hat{\mathbf{x}}) = 0, & (27) \\ \sum_x q(x|\hat{x}) = 1, & (28) \\ q(x|\hat{x}) \geq 0, & (29) \end{cases}$$

878 where  $\tilde{\mathbf{x}} = \sum_{\hat{x}} \mathbf{x}q(x|\hat{x})$ . Eq. 27 enforces that there is no difference between the true compressed representation  
 879 centroids  $\hat{\mathbf{x}}$  and those generated by the estimated  $q(x|\hat{x})$ , while the remaining two constraints ensure that  $q(x|\hat{x})$  is a  
 880 proper probability distribution.

881 Temporarily setting aside the non-negativity constraint (it will be enforced by the form of the solution), the La-  
 882 grangian is then

$$\mathcal{L}[q(x|\hat{x})] = J[q(x|\hat{x}), q(\hat{x}|x)] - \sum_{\hat{x}} \lambda(\hat{x})d(\tilde{\mathbf{x}}|\hat{\mathbf{x}}) + \sum_{\hat{x}} \gamma(\hat{x}) \sum_x q(x|\hat{x}) \quad (30)$$

883 for fixed  $q(\hat{x}|x)$ . Taking the derivative with respect to  $q(x|\hat{x})$  and setting equal to zero, we have

$$0 = p(\hat{x}) \left[ \log \frac{q(\hat{x}|x)}{q(x|\hat{x})p(\hat{x})} - 1 - \lambda(\hat{x}) \frac{\partial}{\partial q(x|\hat{x})} d\left(\sum_x \mathbf{x}q(x|\hat{x})\|\hat{\mathbf{x}}\right) \right] + \gamma(\hat{x}), \quad (31)$$

884 where we absorb a  $1/p(\hat{x})$  term into each Lagrange multiplier  $\lambda(\hat{x})$ . If the function  $d$  is a Bregman divergence, i.e. it  
 885 can be written as  $d_{\phi}(\mathbf{u}|\mathbf{v}) = \phi(\mathbf{u}) - \phi(\mathbf{v}) - \langle \mathbf{u} - \mathbf{v}, \nabla_{\phi}(\mathbf{v}) \rangle$  for some convex function  $\phi$ , then

$$\log \frac{q(x|\hat{x})}{\mu(\hat{x})} = \log \frac{q(\hat{x}|x)}{p(\hat{x})} - \lambda(\hat{x}) \langle \mathbf{x}, \nabla_{\phi}(\tilde{\mathbf{x}}) - \nabla_{\phi}(\hat{\mathbf{x}}) \rangle \quad (32)$$

$$q(x|\hat{x}) = \frac{1}{\mu(\hat{x})} \frac{q(\hat{x}|x)}{p(\hat{x})} e^{-\lambda(\hat{x}) \langle \mathbf{x}, \nabla_{\phi}(\tilde{\mathbf{x}}) - \nabla_{\phi}(\hat{\mathbf{x}}) \rangle} \quad (33)$$

886 Where  $\log \mu(\hat{x}) = \frac{\gamma(\hat{x})}{p(\hat{x})} - 1$ .

887 For the constraint  $\sum_x q(x|\hat{x}) = 1$  to be true, the Lagrange multipliers,  $\mu(\hat{x})$ , must act as a normalization factor,  
888 giving us

$$q(x|\hat{x}) = \frac{q(\hat{x}|x)e^{-\lambda(\hat{x})\langle \mathbf{x}, \nabla_{\phi}(\tilde{\mathbf{x}}) - \nabla_{\phi}(\hat{\mathbf{x}}) \rangle}}{\sum_{x'} q(\hat{x}|x')e^{-\lambda(\hat{x})\langle \mathbf{x}', \nabla_{\phi}(\tilde{\mathbf{x}}) - \nabla_{\phi}(\hat{\mathbf{x}}) \rangle}}. \quad (34)$$

889 This also satisfies the non-negativity constraint for each  $q(x|\hat{x})$ , since  $q(\hat{x}|x) \geq 0$ , and  $e^x \geq 0$  for any  $x \in \mathbb{R}$ . Finally,  
890 we can combine the unknown scalar  $-\lambda(\hat{x})$  and vector  $\nabla_{\phi}(\tilde{\mathbf{x}}) - \nabla_{\phi}(\hat{\mathbf{x}})$  into a single unknown vector  $\nu(\hat{x})$ , giving

$$q(x|\hat{x}) = \frac{q(\hat{x}|x)e^{\langle \mathbf{x}, \nu(\hat{x}) \rangle}}{\sum_{x'} q(\hat{x}|x')e^{\langle \mathbf{x}', \nu(\hat{x}) \rangle}}, \quad (35)$$

891 where  $\nu(\hat{x})$  must be chosen such that Eq. 27 is true.

892 For any Bregman divergence,  $d_{\phi}(\mathbf{u}||\mathbf{v}) = 0$  iff  $\mathbf{u} = \mathbf{v}$  (see Banerjee et al. [3]). Thus to enforce Eq. 27, we need to  
893 find  $\nu(\hat{x})$  s.t.  $\tilde{\mathbf{x}} = \sum_x \mathbf{x}q(x|\hat{x}) = \hat{\mathbf{x}}$ . Let  $G_{\hat{x}}(\nu) = \log \sum_x q(\hat{x}|x) \exp(\langle \mathbf{x}, \nu \rangle)$ . Then the vector of partial derivatives of  
894  $G_{\hat{x}}(\nu)$  with respect to  $\nu$  are given by

$$\nabla G_{\hat{x}}(\nu) = \sum_x \mathbf{x} \frac{q(\hat{x}|x)e^{\langle \mathbf{x}, \nu \rangle}}{\sum_{x'} q(\hat{x}|x')e^{\langle \mathbf{x}', \nu \rangle}} = \tilde{\mathbf{x}}(\nu). \quad (36)$$

895 Since  $G_{\hat{x}}(\nu)$  is strictly convex, we have by Legendre transform its convex conjugate dual,

$$G_{\hat{x}}^*(\tilde{\mathbf{x}}) = \sup_{\nu} \langle \tilde{\mathbf{x}}, \nu \rangle - G_{\hat{x}}(\nu). \quad (37)$$

896 and vector of partial derivatives

$$\nabla G_{\hat{x}}^*(\tilde{\mathbf{x}}) = \arg \sup_{\nu} \langle \tilde{\mathbf{x}}, \nu \rangle - G_{\hat{x}}(\nu). \quad (38)$$

897 By the strict convexity of  $G_{\hat{x}}$  and the definition of the Legendre transform we have that  $\nabla G_{\hat{x}}^*(\tilde{\mathbf{x}}) = (\nabla G_{\hat{x}}(\tilde{\mathbf{x}}))^{-1} =$   
898  $\nu(\tilde{\mathbf{x}})$ , i.e. the unique choice of  $\nu$  for a given value of  $\tilde{\mathbf{x}}$ . The unique choice of  $\nu$  to guarantee  $\tilde{\mathbf{x}} = \hat{\mathbf{x}}$  is then simply  
899  $\nu(\hat{\mathbf{x}}) = \nabla G_{\hat{x}}^*(\hat{\mathbf{x}})$ , which can be computed numerically via e.g. BFGS.

900 The alternating maximization algorithm is then to iterate

$$\begin{cases} q_t(\hat{x}|x) = \frac{q_t(x|\hat{x})p(\hat{x})}{\sum_{\hat{x}} q_t(x|\hat{x})p(\hat{x})} & (39) \\ q_{t+1}(x|\hat{x}) = \frac{q_t(\hat{x}|x)e^{\langle \mathbf{x}, \nu_t(\hat{x}) \rangle}}{\sum_{x'} q_t(\hat{x}|x')e^{\langle \mathbf{x}', \nu_t(\hat{x}) \rangle}}, & (40) \end{cases}$$

901 with  $\nu_t(\hat{x}) = \nabla G_{\hat{x},t}^*(\hat{\mathbf{x}})$ , and starting from any initial  $q_0(x|\hat{x})$ . By construction, the choice of  $q_t(\hat{x}|x)$  maximizes  $J$   
902 for fixed  $q_t(x|\hat{x})$ , and  $q_{t+1}(x|\hat{x})$  maximizes  $J$  for fixed  $q_t(\hat{x}|x)$ , subject to their respective constraints. We thus have a  
903 sequence indexed by  $t$  of non-decreasing values for  $J$ , which converges whenever the maximum entropy is finite. The  
904 solution for the marginal distribution of  $X$  is then given by  $q(x) = \sum_{\hat{x}} q_{\infty}(x|\hat{x})p(\hat{x})$ .

## 905 B.1 Convergence to the global optimum

906 In this section we will show that the alternating minimization algorithm defined by Eq. 39 and Eq. 40 converges  
907 to the global maximum of  $J[q(x|\hat{x}), q(\hat{x}|x)]$  for any initial choice of  $q_0(\hat{x}|x)$ . We will do this using a geometric  
908 approach developed by Csiszár & Tusnády [15]<sup>†</sup>, which for example can be used to prove convergence to the global  
909 optimum for the alternating minimization algorithm proposed by Blahut [14] to find numerical solutions to the rate-  
910 distortion problem. First, note that maximizing  $J[q(x|\hat{x}), q(\hat{x}|x)]$  is equivalent to minimizing  $D[q(x|\hat{x}), q(\hat{x}|x)] =$   
911  $-J[q(x|\hat{x}), q(\hat{x}|x)]$ . Then by Theorems 1 and 2 of Csiszár & Tusnády [15], to show convergence to the global  
912 minimum via alternating minimizations of  $D$  it is sufficient to show that the “three points property” and “four points  
913 property” both hold for  $D$  and a choice of functional,  $\delta$ .

<sup>†</sup>See also Byrne [16] as a helpful reference.



914 **Definition 1.** (From Csiszár & Tusnády [15]) Let  $\delta [p, p']$  be a non-negative valued function on  $P \times P$  such that  
 915  $\delta [p, p] = 0$  for each  $p \in P$ . Given  $D$  and  $\delta$ , for a  $p \in P$  the three points property holds if

$$\delta [p, p_{t+1}] + D [p_{t+1}, q_t] \leq D [p, q_t], \quad (41)$$

916 whenever  $p_{t+1} = \arg \min_p D [p, q_t]$ . The four points property holds for a  $p \in P$  if for every  $q \in Q$

$$D [p, q_t] \leq \delta [p, p_t] + D [p, q], \quad (42)$$

917 whenever  $q_t = \arg \min_q D [p_t, q]$ .

918 We will show that the three and four point properties hold for  $D$  and the following choice of  $\delta$ ,

$$\delta [q(x|\hat{x}), q'(x|\hat{x})] = \sum_{\hat{x}} p(\hat{x}) \sum_x q(x|\hat{x}) \log \frac{q(x|\hat{x})}{q'(x|\hat{x})}. \quad (43)$$

919 Non-negativity of Eq. 43 follows directly from the non-negativity of the KL-divergence and  $p(\hat{x})$ , as does equality  
 920 holding iff  $q(x|\hat{x}) = q'(x|\hat{x})$ .

921 We will also make use of the fact that we can rewrite both the definition of  $\delta$  given by Eq. 43 and  $D$  in terms of the  
 922 following Bregman divergence,

$$d_\psi(\mathbf{x}||\mathbf{y}) = \sum_i w_i \sum_j x_{ij} \log \frac{x_{ij}}{y_{ij}} - \sum_i w_i \sum_j (x_{ij} - y_{ij}), \quad (44)$$

923 where  $w_i$  are constant non-negative weights that sum to one, and  $x_{ij}, y_{ij} \geq 0$ , not necessarily summing to one. In this  
 924 case  $\psi$  is the strictly convex function  $\psi(\mathbf{x}) = \sum_i w_i \sum_j x_{ij} \log x_{ij}$ . Then with  $w_i = p(\hat{x})$ ,  $i$  indexing elements of  $\hat{X}$ ,  
 925 and  $j$  indexing elements of  $X$ , we have that

$$\delta [q(x|\hat{x}), q'(x|\hat{x})] = d_\psi(q(x|\hat{x})||q'(x|\hat{x})), \quad (45)$$

926 and

$$D [q(x|\hat{x}), q(\hat{x}|x)] = -J [q(x|\hat{x}), q(\hat{x}|x)], \quad (46)$$

$$= \sum_x \sum_{\hat{x}} q(x|\hat{x}) p(\hat{x}) \log \frac{q(x|\hat{x}) p(\hat{x})}{q(\hat{x}|x)}, \quad (47)$$

$$= \sum_{\hat{x}} p(\hat{x}) \sum_x q(x|\hat{x}) \log \frac{q(x|\hat{x})}{q(\hat{x}|x)} + \sum_{\hat{x}} p(\hat{x}) \log p(\hat{x}), \quad (48)$$

$$= \sum_{\hat{x}} p(\hat{x}) \sum_x q(x|\hat{x}) \log \frac{q(x|\hat{x})}{q(\hat{x}|x)} - H(\hat{X}) \\ - \left[ \sum_{\hat{x}} p(\hat{x}) \sum_x (q(x|\hat{x}) - q(\hat{x}|x)) \right] + \left[ \sum_{\hat{x}} p(\hat{x}) \sum_x (q(x|\hat{x}) - q(\hat{x}|x)) \right], \quad (49)$$

$$= d_\psi(q(x|\hat{x})||q(\hat{x}|x)) + 1 - \sum_{\hat{x}} p(\hat{x}) \sum_x q(\hat{x}|x) - H(\hat{X}). \quad (50)$$

927 **Lemma 1.** The three points property,  $\delta [q(x|\hat{x}), q_{t+1}(x|\hat{x})] + D [q_{t+1}(x|\hat{x}), q_t(\hat{x}|x)] \leq D [q(x|\hat{x}), q_t(\hat{x}|x)]$ , where  
 928  $q_{t+1}(x|\hat{x}) = \arg \min_{q(x|\hat{x})} D [q(x|\hat{x}), q_t(\hat{x}|x)]$ , holds.

929 *Proof.* Rewriting using Eq. 45 and Eq. 50, we must show that

$$d_\psi(q(x|\hat{x})||q_{t+1}(x|\hat{x})) + d_\psi(q_{t+1}(x|\hat{x})||q_t(\hat{x}|x)) + 1 - \sum_{\hat{x}} p(\hat{x}) \sum_x q_t(\hat{x}|x) - H(\hat{X}) \quad (51)$$

$$\leq d_\psi(q(x|\hat{x})||q_t(\hat{x}|x)) + 1 - \sum_{\hat{x}} p(\hat{x}) \sum_x q_t(\hat{x}|x) - H(\hat{X}). \quad (52)$$

930 Cancelling, we need to show

$$d_\psi(q(x|\hat{x})\|q_{t+1}(x|\hat{x})) + d_\psi(q_{t+1}(x|\hat{x})\|q_t(\hat{x}|x)) \leq d_\psi(q(x|\hat{x})\|q_t(\hat{x}|x)), \quad (53)$$

931 which follows immediately from the Generalized Pythagoras Theorem [3] and the fact that by construction solutions  
932 of Eq. 40 maximize  $J$  for fixed  $q_t(\hat{x}|x)$ , so that

$$q_{t+1}(x|\hat{x}) = \arg \min_{q(x|\hat{x})} D[q(x|\hat{x}), q_t(\hat{x}|x)], \quad (54)$$

$$= \arg \min_{q(x|\hat{x})} d_\psi(q(x|\hat{x})\|q_t(\hat{x}|x)) + \underbrace{1 - \sum_{\hat{x}} p(\hat{x}) \sum_x q_t(\hat{x}|x)}_{\text{constant}} - H(\hat{X}), \quad (55)$$

$$= \arg \min_{q(x|\hat{x})} d_\psi(q(x|\hat{x})\|q_t(\hat{x}|x)). \quad (56)$$

933

934 **Lemma 2.** The four points property,  $D[q(x|\hat{x}), q_t(\hat{x}|x)] \leq \delta [q(x|\hat{x}), q_t(x|\hat{x})] + D[q(x|\hat{x}), q(\hat{x}|x)]$ , where  $q_t(\hat{x}|x) =$   
935  $\arg \min_{q(\hat{x}|x)} D[q_t(x|\hat{x}), q(\hat{x}|x)]$ , holds.

936 *Proof.* From the definitions of  $D$  and  $\delta$ , we must show that

$$\sum_{\hat{x}} p(\hat{x}) \sum_x q(x|\hat{x}) \log \frac{q(x|\hat{x})p(\hat{x})}{q_t(\hat{x}|x)} \leq \sum_{\hat{x}} p(\hat{x}) q(x|\hat{x}) \log \frac{q(x|\hat{x})}{q_t(x|\hat{x})} + \sum_{\hat{x}} p(\hat{x}) \sum_x q(x|\hat{x}) \log \frac{q(x|\hat{x})p(\hat{x})}{q(\hat{x}|x)}. \quad (57)$$

937 By subtraction, equivalently we must show that

$$0 \leq \sum_{\hat{x}} p(\hat{x}) q(x|\hat{x}) \log \frac{q(x|\hat{x})}{q_t(x|\hat{x})} + \sum_{\hat{x}} p(\hat{x}) \sum_x q(x|\hat{x}) \log \frac{q_t(\hat{x}|x)}{q(\hat{x}|x)}. \quad (58)$$

938 Denoting  $q_t(x) = \sum_{\hat{x}} q_t(x|\hat{x})p(\hat{x})$ , from Eq. 39 we have that  $q_t(\hat{x}|x) = q_t(x|\hat{x})p(\hat{x})/q_t(x)$ . Then by substitution we  
939 have

$$0 \leq \sum_{\hat{x}} p(\hat{x}) q(x|\hat{x}) \log \frac{q(x|\hat{x})}{q_t(x|\hat{x})} + \sum_{\hat{x}} p(\hat{x}) \sum_x q(x|\hat{x}) \log \frac{q_t(x|\hat{x})p(\hat{x})}{q(\hat{x}|x)q_t(x)}, \quad (59)$$

$$= \sum_{\hat{x}} p(\hat{x}) q(x|\hat{x}) \log \frac{q(x|\hat{x})p(\hat{x})}{q(\hat{x}|x)q_t(x)}, \quad (60)$$

$$= \sum_{\hat{x}} p(\hat{x}) q(x|\hat{x}) \log \frac{q(x)}{q_t(x)}, \quad (61)$$

$$= \sum_x q(x) \log \frac{q(x)}{q_t(x)}, \quad (62)$$

940 where Eq. 61 follows from the fact that  $q(x) = q(x|\hat{x})p(\hat{x})/q(\hat{x}|x)$ , and Eq. 62 from the fact that  $q(x) =$   
941  $\sum_{\hat{x}} q(x|\hat{x})p(\hat{x})$ . Then this is equivalent to the statement that  $0 \leq D_{\text{KL}}[q(x)\|q_t(x)]$ , which is true by non-negativity  
942 of the KL-divergence. ■

943 **Theorem 1.** The sequence of alternating maximizations defined by Eq. 39 and Eq. 40 converges to the global maxi-  
944 mum of  $J[q(x|\hat{x}), q(\hat{x}|x)]$  for any initial choice of  $q_0(\hat{x}|x)$ .

945 *Proof.* Proof of Theorem B.1 follows from satisfying the five point property of Csiszár & Tusnády [15], which is  
946 implied by satisfying the three and four points properties from Lemma 1 and Lemma 2, respectively. ■

## 947 B.2 Uniqueness

948 In the previous section we showed that the solution found by the alternating maximization algorithm is globally  
949 optimal. Here we show that the optimal  $q(x)$  distribution is also unique.

950 **Theorem 2.** The distribution  $q^*(x) = \sum_{\hat{x}} q^*(x|\hat{x})p(\hat{x})$  for the  $q^*(x|\hat{x})$  achieving the maximum of  $J[q(x|\hat{x}), q(\hat{x}|x)]$   
951 is unique.

952 *Proof.* Assume  $q^*(x)$  is not unique, and there exists a distinct solution  $q'(x)$  that also achieves the maximum of  
953  $J[q(x|\hat{x}), q(\hat{x}|x)]$  with  $q'(x|\hat{x})$ . Then two things must be true.

954 First, since  $q^*(x)$  and  $q'(x)$  are distinct, then  $0 < D_{\text{KL}}[q^*(x)||q'(x)]$ . From the definition of the KL-divergence  
955 and using the fact that  $q(x) = \sum_{\hat{x}} q(x|\hat{x})p(\hat{x})$ , we have that

$$0 < \sum_x \sum_{\hat{x}} q^*(x|\hat{x})p(\hat{x}) \log \frac{q^*(x)}{q'(x)}. \quad (63)$$

956 Since  $q(x) = q(x|\hat{x})p(\hat{x})/q(\hat{x}|x)$  (for any choice of  $\hat{x}$ ), the definition  $q(x|\hat{x})$  from Eq. 40, and the equivalence of  
957  $\nu^*(\hat{x}) = \nu'(\hat{x}) = \nu(\hat{x})$ , we have

$$0 < \sum_x \sum_{\hat{x}} q^*(x|\hat{x})p(\hat{x}) \log \frac{\frac{e^{\langle \mathbf{x}, \nu(\hat{x}) \rangle}}{\sum_{x'} q^*(\hat{x}|x)e^{\langle \mathbf{x}', \nu(\hat{x}) \rangle}}}{\frac{e^{\langle \mathbf{x}, \nu(\hat{x}) \rangle}}{\sum_{x'} q'(\hat{x}|x)e^{\langle \mathbf{x}', \nu(\hat{x}) \rangle}}}, \quad (64)$$

$$= \sum_{\hat{x}} p(\hat{x}) \log \frac{\sum_{x'} q'(\hat{x}|x)e^{\langle \mathbf{x}', \nu(\hat{x}) \rangle}}{\sum_{x'} q^*(\hat{x}|x)e^{\langle \mathbf{x}', \nu(\hat{x}) \rangle}}, \quad (65)$$

958 since after cancellation none of the terms depend on  $x$  except  $q^*(x|\hat{x})$ , and  $\sum_x q^*(x|\hat{x}) = 1$ .

959 Second, since both  $q^*(x)$  and  $q'(x)$  achieve the global optimum, we must have that  $J[q^*(x|\hat{x}), q^*(\hat{x}|x)] =$   
960  $J[q'(\hat{x}|x), q'(\hat{x}|x)]$ . Then after cancelling we have

$$\sum_{\hat{x}} p(\hat{x}) \sum_x q^*(x|\hat{x}) \log \frac{q^*(\hat{x}|x)}{q^*(x|\hat{x})} = \sum_{\hat{x}} p(\hat{x}) \sum_x q'(x|\hat{x}) \log \frac{q'(\hat{x}|x)}{q'(x|\hat{x})}. \quad (66)$$

961 From the definition of  $q(x|\hat{x})$  in Eq. 40 and the equivalence of  $\nu^*(\hat{x}) = \nu'(\hat{x}) = \nu(\hat{x})$ ,

$$\sum_{\hat{x}} p(\hat{x}) \sum_x q^*(x|\hat{x}) \log \frac{e^{\langle \mathbf{x}, \nu(\hat{x}) \rangle}}{\sum_{x'} q^*(\hat{x}|x)e^{\langle \mathbf{x}', \nu(\hat{x}) \rangle}} = \sum_{\hat{x}} p(\hat{x}) \sum_x q'(x|\hat{x}) \log \frac{e^{\langle \mathbf{x}, \nu(\hat{x}) \rangle}}{\sum_{x'} q'(\hat{x}|x)e^{\langle \mathbf{x}', \nu(\hat{x}) \rangle}}. \quad (67)$$

962 Then, since  $\sum_x \mathbf{x}q^*(x|\hat{x}) = \sum_x \mathbf{x}q'(x|\hat{x}) = \hat{\mathbf{x}}$ , we can cancel the  $\sum_{\hat{x}} p(\hat{x}) \langle \hat{\mathbf{x}}, \nu(\hat{x}) \rangle$  term from both sides, and using  
963 the fact that  $\sum_x q^*(x|\hat{x}) = \sum_x q'(x|\hat{x}) = 1$ , we have

$$0 = \sum_{\hat{x}} p(\hat{x}) \log \frac{\sum_{x'} q'(\hat{x}|x)e^{\langle \mathbf{x}', \nu(\hat{x}) \rangle}}{\sum_{x'} q^*(\hat{x}|x)e^{\langle \mathbf{x}', \nu(\hat{x}) \rangle}}. \quad (68)$$

964 But this contradicts the inequality established by Eq. 65. Thus  $q^*(x)$  must be unique. ■

## 965 B.3 Example inference and comparison to prior work

966 As an illustrative example, we present the results of the inverse inference method above for a known distribution of  
967 needs,  $p(x)$ . This toy example allows us to study the properties of the inverse inference when the ground truth,  $p(x)$ ,  
968 is known. We also use this example to illustrate the difference between our inference method and inferences based  
969 on two prior methods in the literature. Rather than solving for the maximum entropy distribution consistent with a  
970 rate-distortion optimal vocabulary, the ‘‘capacity achieving prior’’ (CAP) method [7] assumes instead that the true  $p(x)$   
971 will be one such that, given a vocabulary of term mappings  $p(\hat{x}|x)$ , we only ever need to communicate the  $x$ ’s that are

972 maximally unambiguous to specify with that vocabulary. The CAP distribution is the one that achieves the maximum  
973 channel capacity for the given term map  $p(\hat{x}|x)$  (the specification of the channel from  $X$  to  $\hat{X}$ ), i.e. satisfying

$$p_{\text{CAP}}(x) = \arg \max_{q(x)} \sum_{x, \hat{x}} p(\hat{x}|x) q(x) \log \frac{p(\hat{x}|x)}{q(\hat{x})}, \quad (69)$$

974 where  $q(\hat{x}) = \sum_{x'} p(\hat{x}|x') q(x')$ . This is a strong assumption in general, and when it is violated, as we will see in this  
975 section, the CAP provides a poor approximation of the true distribution  $p(x)$ .

976 We also compare our approach to the word-frequency method (here abbreviated WF) proposed in [17], which asks  
977 for the maximum entropy distribution  $p_{\text{WF}}(x)$  that satisfies the linear constraints  $p(\hat{x}) = \sum_x p(\hat{x}|x) p_{\text{WF}}(x)$ . In other  
978 words, the WF method solves for the distribution of communicative needs consistent with a given term mapping,  
979  $p(\hat{x}|x)$ , and known word frequencies,  $p(\hat{x})$ . To understand what this does in practice, it is instructive to consider the  
980 case of “hard” clusters where  $p(\hat{x}|x)$  equals either 1 or 0. In this case, we derive an analytical solution for the WF  
981 inference (see SI Sec. D.1), which is given by  $p_{\text{WF}}(x) = p(\hat{x}(x)) / \sum_{x'} p(\hat{x}(x)|x')$ , where  $\hat{x}(x)$  is the unique nonzero  
982  $\hat{x}$  in  $p(\hat{x}|x)$ ; i.e., the  $\hat{x}$  chosen for a given  $x$ . In effect, then, the WF method approximates communicative need by  
983 dividing the frequency of a given word,  $p(\hat{x})$ , uniformly across its mapped domain. In the “soft” case, solutions  
984 behave similarly but with an additional factor accounting for “fuzzy” boundaries between  $\hat{x}$  domains. While this  
985 gives considerably more reasonable estimates of needs than the CAP approach, it depends on the availability of word  
986 frequencies,  $p(\hat{x})$ , and it again requires knowledge of the term maps  $p(\hat{x}|x)$ ; the former is unknown for almost all  
987 WCS languages, and the latter introduces circularity when aiming to predict term maps based on language-specific  
988 communicative needs.

989 In our toy example  $x \in X$  covers the unit grid ( $n = 100 \times 100$ ) with an arbitrary but specified distribution  $p(x)$ , as  
990 shown in Fig. B1a (ground truth). The figure also shows the RDBC solutions for either 4 or 8 terms (Fig. B1a and B1b,  
991 respectively; this example uses squared Euclidean distance as the distortion measure). The ground truth distribution  
992  $p(x)$  was chosen to be nonuniform, with a broad probability gradient from  $(0, 0)$  to  $(1, 1)$ , and a smaller-scale low to  
993 high to low to high oscillation in probability along the x-axis. The RDBC centroids and Voronoi (nearest-centroid)  
994 regions show a non-uniform division of  $X$  into clusters (or “terms,” to link this to the terminology of the color naming  
995 problem), as a result of using a non-uniform  $p(x)$ .

996 Based on only the positions of the focal terms  $\hat{x}$  and the term frequencies  $p(\hat{x})$ , our inverse method produces an  
997 estimate of  $p(x)$  that recapitulates the broad-scale features of the ground truth. The inverse inference performs well  
998 even with as few as 4 terms (Fig. B1a), with some additional, fine-scale details captured when inferring from 8 terms  
999 (Fig. B1b). By contrast, the distributions inferred by the CAP method, which are not based on  $\hat{x}$  and  $p(\hat{x})$  but instead  
1000 require knowing the full term map  $p(\hat{x}|x)$ , deviate significantly from the ground truth (Fig. B1a and B1b; note different  
1001 scale).

1002 In Fig. B1c, the entropy of inferred and CAP solutions are shown for a broader range of vocabulary sizes (from  
1003 2 to 10). The figure also quantifies the dissimilarity between the ground truth and the estimated distributions, based  
1004 on their KL-divergence. Successive iterations of the inverse inference algorithm show monotonic convergence to a  
1005 maximal entropy value that lies between the ground-truth entropy and the unconstrained maximum entropy distribu-  
1006 tion (uniform over  $X$ ). Note there are only small differences between the maximum entropy values achieved when  
1007 varying the vocabulary size used (the equivalent of the number of color terms). While not directly constrained by the  
1008 inverse inference method, since the ground truth distribution is assumed unknown, the inverse method converges to  
1009 distributions that are very close to the true distribution. Solutions become closer to ground truth as the vocabulary size  
1010 increases, but even small vocabularies provide inferences that closely approximate the ground truth. By comparison,  
1011 CAP solutions have entropies that are substantially lower than the maximum or even the ground truth entropy, and they  
1012 are sensitive to vocabulary size. CAP solutions are orders of magnitude more divergent from ground truth, compared  
1013 to the results of the inverse inference method we have developed.

## 1014 C Application to color categories

1015 We use the inverse inference method of SI Sec. B to find the distributions of communicative need for empirical color  
1016 vocabularies via the following correspondence (outlined in Fig. 1c). In this application, the source,  $X$ , denotes the  
1017 visible colors that need to be communicated, which are the WCS stimuli set. Each WCS stimulus color,  $x$ , in the  
1018 set of WCS stimuli,  $\mathcal{X}$ , has a position  $\mathbf{x}$  in CIE Lab, a perceptually uniform color space. The unknown distribution  
1019 of communicative need we wish to infer is  $p(x)$ . Our estimate of  $p(x)$  will be the one that best matches the known



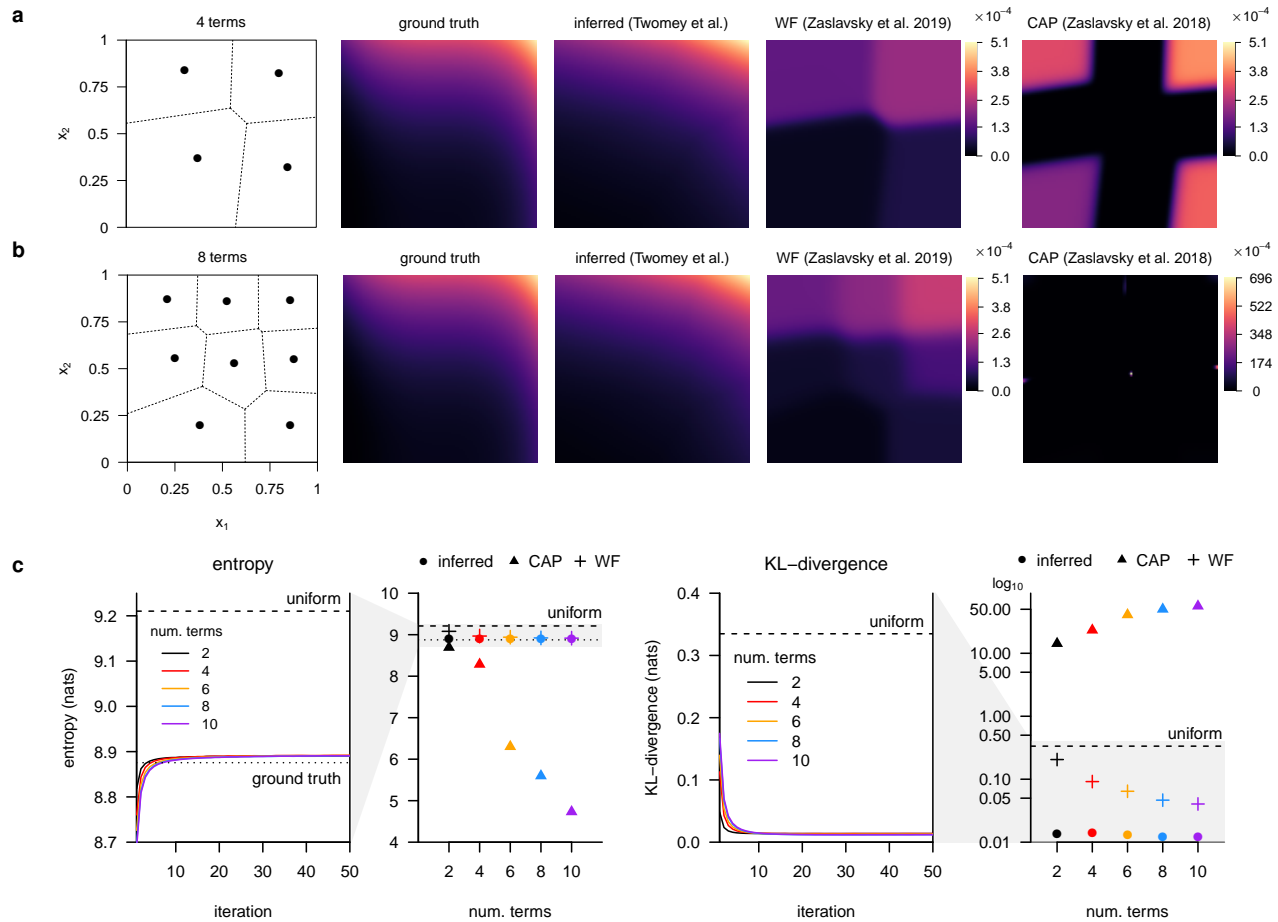

**Figure B1. Example inference of the distribution,  $p(x)$ , underlying a given rate-distortion solution.** (a) An example rate-distortion vocabulary (left) with 4 terms (black points show position of term centroids,  $\hat{x}$ ) giving a compressed representation of a dense square grid ( $100 \times 100$ ) of elements  $X$  with distribution  $p(x)$  (middle-left “ground truth”). Using the positions,  $\hat{x}$ , and probabilities,  $p(\hat{x})$ , of the vocabulary terms alone, the inverse algorithm infers distribution  $p_{\text{inf}}(x)$  (middle-center), which approximates the main features of the true distribution  $p(x)$  (same color scale). For comparison, we also show the distributions inferred under the word-frequency (WF) method (middle-right) and the capacity achieving distribution (CAP, right). (b) The same example as in (a) but for an 8-term rate-distortion vocabulary (grid and ground truth distributions are identical). (c) Evolution of the key quantities in the inference algorithm’s iterative solutions to the example used in (a) & (b), for vocabulary sizes 2, 4, 8, and 16, with comparisons to WF and CAP used in prior work. (Left) The entropy of the inferred distribution monotonically increases with each iteration of the inverse inference algorithm, and converges to values between the true entropy (dotted line labeled “ground truth”) and the maximum entropy (dashed line labeled “uniform”) for this example as expected. The entropy is reduced and approaches the true entropy as the number of terms is increased, but only to a small degree compared to CAP. The adjacent figure with expanded  $y$ -axis shows converged values for inferred, WF, and CAP distributions (circles, crosses, and triangle plotting symbols, respectively). CAP solutions have lower entropy than the true distribution, are more sensitive to the number of vocabulary terms, and become increasingly different as the number of terms increases. (Right) The KL-divergence between the inferred distribution and true distribution tends to decrease and converges to small values. This is a consequence of matching the term centroids since the true distribution is not known to the inverse inference algorithm. The adjacent figure compares the inferred, WF, and CAP distributions KL-divergence to the true distribution at convergence (log scale). The distributions inferred by our method are close to the true distribution, and become even closer with increasing vocabulary size; while the CAP distributions are far from the ground truth and become increasingly farther, even more so than uniform. The WF solutions are sensitive to the number of terms available, and at 10 terms give solutions that are nearly a factor 3 further from ground truth than our inferred solutions for 2 terms (0.04 vs. 0.014).

1020 position,  $\hat{\mathbf{x}}$ , of each “best-example,” or focal, color for each term,  $\hat{x}$ , in the language’s color vocabulary,  $\hat{\mathcal{X}}$ , and is  
 1021 otherwise maximally unbiased (maximizes the entropy of the inferred distribution).

1022 Intuitively, in the inverse inference procedure (SI Sec. B), the vectors  $\nu(\hat{x})$  can be thought of as “pulling” on the  
 1023 inferred distribution such that the inferred centroids match the position of the true centroids. In the example shown in  
 1024 SI Sec. B.3, the positions of the true centroids lie in the interior of the boundary of all the  $x$  positions. To match prior  
 1025 work and the WCS itself, we use the WCS color chips (Fig. 1a) as the support set for the inverse inference. Since  
 1026 WCS participants selected focal colors from this same set, the average focal color position across participants could  
 1027 lie on or near the boundary of the support set if there is high agreement among participants. To match these positions  
 1028 with the given support set, the inverse method would be forced to “pull” with overly large magnitudes towards these  
 1029 remote points, when this is just an artifact of the constraints on participants and the choice of support.

1030 To check if this was the case, and to mitigate any impact it may have, we constrained the maximum magnitude  
 1031 that any  $\nu(\hat{x})$  could have, and varied this value as a parameter,  $\lambda$ . At  $\lambda = 0$  the inverse method makes no attempt to  
 1032 match the language centroids, and we recover only the uniform distribution over the WCS color chips. At  $\lambda = \infty$ ,  
 1033 we recover the unconstrained inverse inference method. At intermediate values of  $\lambda$ , pathologically large magnitudes  
 1034 have limited impact on the inference. If indeed there are pathologically large magnitudes at play, then there should be  
 1035 a large difference between the entropy at  $\lambda = \infty$ , where the inferred distribution becomes overly concentrated at the  
 1036 problematic focal point, and at intermediate values of  $\lambda$  for which the nearly the same RMSE between inferred and  
 1037 true focal points is achieved. Fig. C2a shows that this is exactly the case, and suggests that  $\lambda \leq 0.25$  is sufficient to  
 1038 achieve RMSE’s close to the unconstrained solutions, while maintaining substantially higher entropies.

1039 Note that RMSE is measured using the empirical focal points and the position of the focal points for the optimal  
 1040 rate-distortion fit using the inferred distribution at a given value of  $\lambda$ . Rate-distortion solutions were found using the  
 1041 standard alternating minimization algorithm (see Banerjee et al. [3]),

$$\left\{ \begin{array}{l} \hat{\mathbf{x}}_t = \sum_x \mathbf{x} q_t(x|\hat{\mathbf{x}}), \\ q_t(\hat{x}) = \sum_x q_t(\hat{x}|x)p(x), \\ q_{t+1}(\hat{x}|x) = \frac{q_t(\hat{x})e^{-\beta d(\mathbf{x}||\hat{\mathbf{x}}_t)}}{\sum_{\hat{x}'} q_t(\hat{x}')e^{-\beta d(\mathbf{x}||\hat{\mathbf{x}}'_t)}}, \end{array} \right. \quad \begin{array}{l} (70) \\ (71) \\ (72) \end{array}$$

1042 where  $q_t(x|\hat{\mathbf{x}}) = q_t(\hat{x}|x)p(x) / \sum_{x'} q_t(\hat{x}|x')p(x')$ , and  $\beta$  is a parameter that acts as an “inverse temperature,” control-  
 1043 ling the “softness” (low values of  $\beta$ ) or “hardness” (high values) of the boundaries between terms given by  $p(\hat{x}|x)$ .  
 1044 Since RDBC solutions are not unique, we run the algorithm starting from many different initial conditions (initial  
 1045  $\hat{\mathbf{x}}$  positions drawn uniformly at random from the set of WCS color chips) until convergence (change in  $\hat{\mathbf{x}}$  positions  
 1046 between iterations is  $< 1 \times 10^{-5}$  or the maximum number of iterations is reached; max iterations  $1 \times 10^4$  used in  
 1047 searches for the optimal value of  $\beta$ ; max iterations  $5 \times 10^4$  for calculation of RDBC solution using the optimal value  
 1048  $\beta$ ), and keep the solution with lowest mean squared error. We used a standard derivative-free nonlinear optimiza-  
 1049 tion method (bound optimization by quadratic approximation [18], via the `nloptr` (v1.2.1) package for R v3.6.3) to  
 1050 search for lowest mean squared error values of  $\beta$ .

1051 For each B&K+WCS language, the minimal RMSE for inverse inference with  $\lambda \leq 0.25$  is shown in Fig. C2b  
 1052 (y-axis), and compared with the minimal RMSE (same optimization procedure for non-unique RDBC solutions and  
 1053 choice of  $\beta$ ) for uniform (x-axis). In all cases, use of the inferred distribution reduces RMSE compared to uniform  
 1054 (all points below 1–1 line). As useful references, we quantified the RMSE for within-language variability in focal  
 1055 point positions among participants (via bootstrap resampling of participant responses and measuring their RMSE with  
 1056 respect to the mean focal point positions for that language), as well as the RMSE when all terms are off by one WCS  
 1057 color chip. Most inferred distribution RMSE’s are between the median values of these two reference quantities, which  
 1058 is not the case for uniform.

1059 Similarly, in Fig. C2c we show the absolute improvement in term map predictions for the WCS languages shown in  
 1060 Fig. 3b, comparing the Earth mover’s distance (EMD) between predicted and empirical term maps based on inferred  
 1061 (y-axis) and uniform (x-axis) distributions. WCS languages were used for term map comparisons both for the ability to  
 1062 resample from among speaker responses (the B&K data surveyed only one speaker per language) to assess confidence  
 1063 intervals on improvement in Fig. 3b, and because the B&K study design substantially differed methodologically from  
 1064 the WCS in the color naming task.<sup>†</sup> In the WCS color naming was assayed for each color chip, whereas in B&K

<sup>†</sup>The focal color assays of B&K and the WCS were essentially the same, however. Hence the inclusion of both data sets in other analyses where

1065 participants selected chips out of the full set of stimuli [19]. While the B&K term maps are related to  $p(\hat{x}|x)$ , they  
 1066 are not straightforward estimates of  $p(\hat{x}|x)$  as in the WCS, and behave qualitatively differently. As useful reference  
 1067 points, we computed the EMD between empirical vocabularies and rotations thereof, approximated by cycling WCS  
 1068 columns 2:41. This transform preserves the structure of each vocabulary while increasing the displacement (in hue)  
 1069 between the true and rotated terms, and has been used in prior work on color naming [6]. Here it provides a more  
 1070 meaningful distance scale for the EMD measurements than e.g. chip-wise randomization.

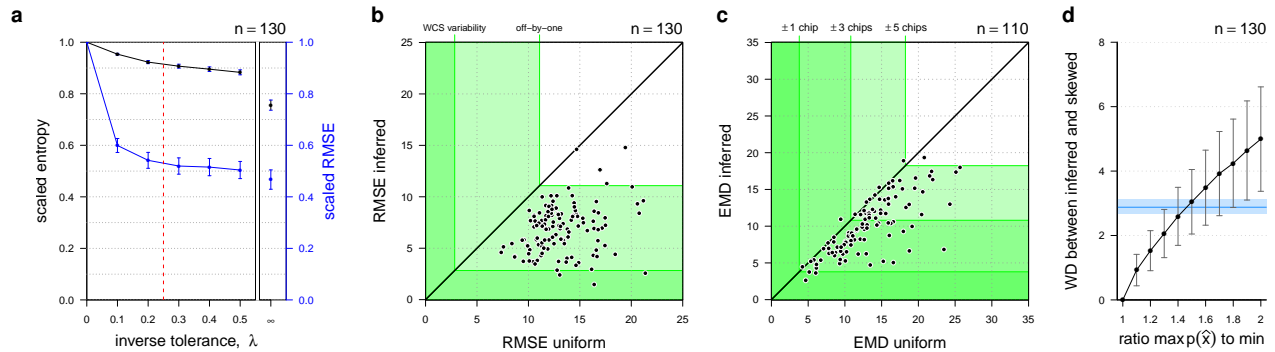

**Figure C2. Application of inverse inference algorithm to WCS.** (a) In the constrained-maximum version of the inverse inference method, small values of the inverse tolerance parameter,  $\lambda$ , (x-axis) can achieve values of RMSE (mean and 95% confidence intervals shown scaled relative to uniform) comparable to the non-relaxed inverse inference ( $\lambda = \infty$ ), while maintaining a much higher entropy (shown scaled relative to uniform). (b) RMSE between rate-distortion optimal vocabularies under inferred distribution,  $p_{\text{inf}}(x)$ , (y-axis) and empirical ground truth, compared to RMSE under uniform distribution,  $p_{\text{unif}}(x)$ , (x-axis). All points lie below 1–1 line (black), showing that inferred strictly improves over uniform for matching focal point positions. Regions bounded by reference lines for median RMSE from within-language variability in focal point position (“WCS variability”) and median all focal point positions off-by-one WCS chip (“off-by-one”) are shown overlapping in green. (c) Average Earth mover’s distance (EMD) between rate-distortion predicted and empirically observed term maps for each WCS language vocabulary under a uniform distribution of communicative need (x-axis) or the language inferred distribution (y-axis). Reference lines at  $\pm 1$ ,  $\pm 3$ , and  $\pm 5$  chips show the median EMD across languages comparing empirically observed languages to themselves  $\pm$  a rotation in hue (rotation of WCS columns 1:40). (d) Sensitivity of inferred language-specific communicative needs to the assumption of uniform term frequencies,  $p(\hat{x})$ . Mean and standard deviation Wasserstein distance is shown between inferred distributions under a uniform  $p(\hat{x})$  and an asymmetric (“skewed”) distribution constructed with varying ratios of  $\max p(\hat{x})$  to  $\min p(\hat{x})$  (x-axis). Reference line (blue) shows median Wasserstein distance and 95% CI between inferred distributions derived from language mean focal color position and focal colors resampled from language speaker responses (based on WCS languages).

## 1071 C.1 RMSE reference points

1072 We provide three points of comparison for the RMSE distributions shown in Fig. 2b. First, the “WCS variability”  
 1073 reference line was computed by resampling participant focal point choices by language, recomputing the mean focal  
 1074 point across resampled participants, and measuring the RMSE between the recomputed focal points and the actual  
 1075 language focal points. We used the median computed RMSE as a useful reference point approximating a lower  
 1076 bound on how well predicted focal points might be expected to perform. Second, the “off-by-one” reference line  
 1077 was computed by repeatedly offsetting each focal point by one WCS chip sampled uniformly at random from the  
 1078 neighborhood of WCS color chips in Fig. 1a and measuring the RMSE between the set of perturbed focal points  
 1079 for a language and the actual focal points. The median computed RMSE in this case gives an intermediate point  
 1080 of comparison for predicted focal point RMSE distributions. Third, the “random” reference line was computed by  
 1081 resampling each language’s focal points from the WCS color chips uniformly at random without replacement, then  
 1082 assigning each resampled focal point to the nearest true focal point, and measuring the RMSE of the two sets of focal  
 1083 points under this assignment. This gives an approximate upper bound on how poorly a predicted set of focal points  
 1084 might perform, using the same procedure for assigning predicted focal points under the rate-distortion model to actual  
 1085 language focal points.

only focal color estimates are necessary.

## 1086 C.2 Sensitivity of inferred distributions to term frequencies, $p(\hat{x})$

1087 The inverse inference algorithm uses the frequency of vocabulary terms,  $p(\hat{x})$ , as part of the inference process for  
1088 determining  $p(x)$ . This information is not available for color vocabularies in the B&K and WCS datasets, and further  
1089 field work would be required to estimate these quantities directly (with the additional caveat that vocabularies may  
1090 have changed since having been originally surveyed). And so the present work uses the simplifying assumption of a  
1091 uniform  $p(\hat{x})$ . This is a reasonable approximation, given the WCS selection criteria for basic color terms and evidence  
1092 in English that basic color terms are elicited with approximately equal frequency under a free naming task [10]. Nev-  
1093 ertheless, to investigate the sensitivity of inferred distributions to this choice, we compared inferred distributions under  
1094 increasingly asymmetric (“skewed”) distributions for  $p(\hat{x})$ , sampled from a linearly increasing set of probabilities be-  
1095 tween the minimum and maximum  $p(\hat{x})$ . Fig. C2d shows the Wasserstein distance between the inferred distributions  
1096 under uniform  $p(\hat{x})$  and the skewed distribution as a function of the ratio between the maximum and minimum  $p(\hat{x})$ .  
1097 As a useful reference point, we computed the median Wasserstein distance between inferred distributions under the  
1098 uniform  $p(\hat{x})$  assumption re-sampled from the WCS language speaker populations. Ratios in usage greater than ap-  
1099 proximately 1.5 would be needed before non-uniformity would begin to have a more significant impact on inferred  
1100 distributions than the among-speaker variability inherent in the data. While this suggests the choice of a uniform  $p(\hat{x})$   
1101 is reasonable to a first approximation, the extent to which this assumption of uniformity may be violated in some  
1102 languages remains an open, but potentially tractable, question for future field work.

## 1103 C.3 Sensitivity of inferred distributions to vocabulary size, $|\hat{\mathcal{X}}|$

1104 Under the rate distortion hypothesis, color vocabularies optimize the information a listener can infer about the color  
1105 being referenced, based on the color term chosen by a speaker. Because there are far fewer terms than perceivable  
1106 colors, there is by necessity some loss of information caused by the compression of colors into terms. As a result,  
1107 the size of a vocabulary (number of terms) should have some impact on our ability to infer the underlying distribution  
1108 of communicative needs,  $p(x)$ : larger vocabularies should provide more resolution and more detail in the inferred  
1109 distribution. For the B&K+WCS languages, we can expect that fewer terms will result in the recovery of only broad-  
1110 scale features of a language’s communicative needs, while more terms allow for additional detail.

1111 This effect is demonstrated in Figure C3a. Here we generated rate-distortion efficient vocabularies for simulated  
1112 languages, each generated from the same underlying distribution of underlying communicative needs and differing  
1113 only in the number of color terms. We then inferred the distribution of needs from the simulated focal color positions,  
1114 using our inverse inference method. As expected, we find that having more color terms allows for more detail to  
1115 be recovered in the inferred distribution of needs, although the results are qualitatively similar across a range of  
1116 vocabulary sizes.

1117 We also investigated the relationship between vocabulary size and inferred needs in more systematic detail. To  
1118 do so, we again generated rate-distortion efficient vocabularies for pairs of languages sharing the same underlying  
1119 communicative needs and differing only in vocabulary size. We used the B&K+WCS average inferred distribution as  
1120 a “ground truth,” and the number of terms in each simulated vocabulary was restricted to the range of terms found in  
1121 the B&K+WCS data. We then inferred the communicative needs for each simulated vocabulary in the pair, and we  
1122 measured their Wasserstein distance. Figure C3b shows a small but statistically significant impact of differences in  
1123 vocabulary size on the measured distance between inferred distributions of need – which arises because vocabulary  
1124 size has an impact on the resolution of the inference. For comparison to these simulations, in which the underlying  
1125 needs are kept constant, we also plotted the distances between inferred needs measured in the empirical data, for  
1126 all pairs of B&K+WCS languages. The empirical distances between inferred needs are much larger than can be  
1127 explained by the simulated data. These results imply that differences in vocabulary size alone cannot explain the  
1128 large differences observed among B&K+WCS inferred communicative needs. Moreover, the relationship between  
1129 differences in vocabulary size and differences in inferred needs has substantially greater magnitude in the empirical  
1130 data than in the simulated languages. This suggests that there may be typical ways in which communicative needs  
1131 evolve as the vocabularies of languages change in size – which is an interesting hypothesis for future study.

## 1132 C.4 Capacity achieving distributions for individual WCS languages

1133 The capacity achieving distributions, which are referred to as priors (CAP) in the literature, should not in general be  
1134 expected to approximate the true distribution of communicative need, as shown in SI Sec. B.3. Here we reproduce

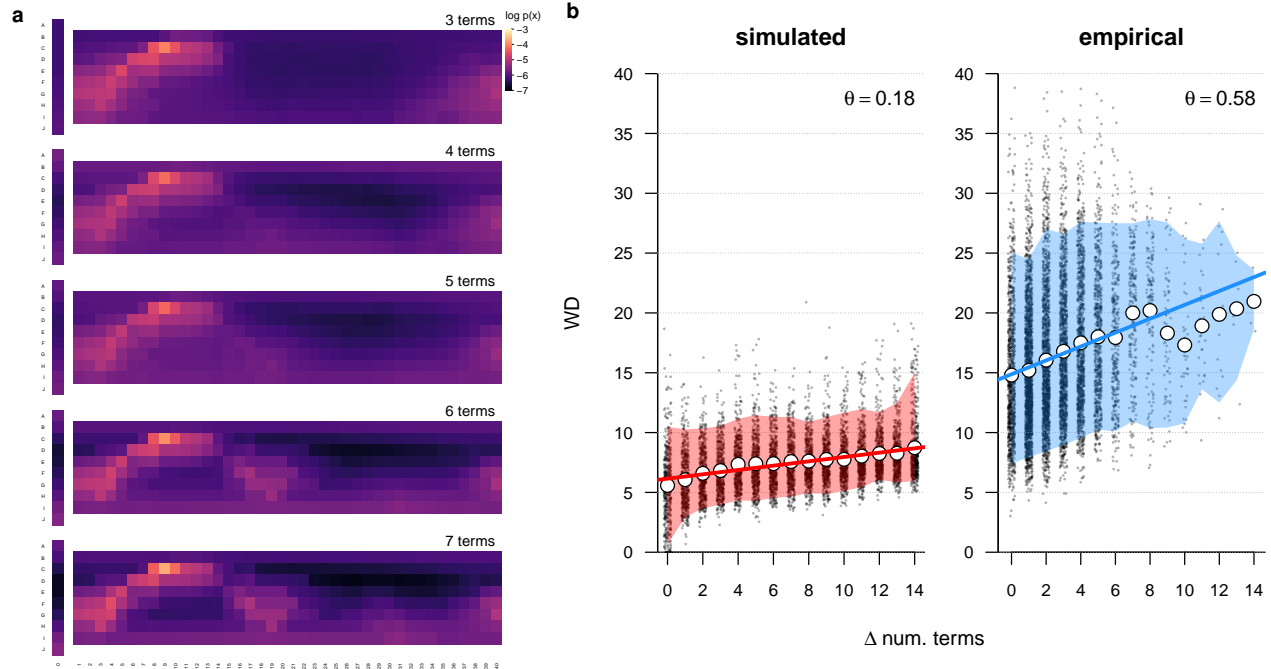

**Figure C3. Sensitivity to number of color terms.** (a) Average inferred distributions of communicative need for rate-distortion optimal vocabularies simulated with different numbers of terms but the same underlying communicative need (the B&K+WCS average inferred distribution). A larger number of terms provides more resolution and detail in the inferred distribution of needs, but the inferred distributions are nonetheless qualitatively the same. (b) Simulated (*left*) and empirical (*right*) Wasserstein distances (WD) between inferred distributions of need for pairs of languages, shown as a function of the difference in the number of their terms ( $\Delta$  num. terms, white points show mean WD for each  $\Delta$  num. terms). Differences in inferred communicative needs (WD) are substantially smaller in the simulations, which isolate the effects attributable to vocabulary size alone, compared to the differences observed among empirical languages (red and blue bands show 90% extent of simulated and empirical distances, respectively). Also, the relationship between vocabulary size and differences in inferred needs (WD) is substantially smaller (slope of linear regression  $\theta = 0.18$ , red line) in the simulated data with a single shared distribution of needs, compared to the relationship observed in the empirical data (slope  $\theta = 0.58$ , blue line).

1135 the average CAP across the WCS languages reported in Zaslavsky et al. [7, 17]. The average CAP differs by several  
 1136 orders of magnitude from the average distribution  $p(x)$  inferred in this paper (Fig. C4a). The language-specific CAP's  
 1137 for Waorani and Martu-Wangka are shown in Fig. C4b: they each differ radically from the communicative needs we  
 1138 estimate by our inference method. The CAP distributions feature implausible variation in communicative need across  
 1139 nearby colors.

## 1140 C.5 Field work variability

1141 Variability in how the field work for the WCS was conducted for different languages does not appear to explain the in-  
 1142 stances of non-improvement in Fig. 3b term map predictions. For the WCS, native speakers were asked to use only the  
 1143 basic color terms of their language, as previously identified according to a set of specific linguistic criteria. However  
 1144 in some cases it seems that native speakers apparently were not so constrained, either by experimenter or participant  
 1145 choice. Based on the identification of these two modes in the WCS by Gibson et al. [20] in their supplementary mate-  
 1146 rials, there was no apparent relationship between the choice of methodology and a language showing improvement or  
 1147 no improvement under the inferred distribution vs. uniform.

## 1148 C.6 Potential correlates of communicative needs

1149 Here we consider possible correlates of the communicative needs we infer, based on proxy measures and potential  
 1150 confounds suggested by prior work.



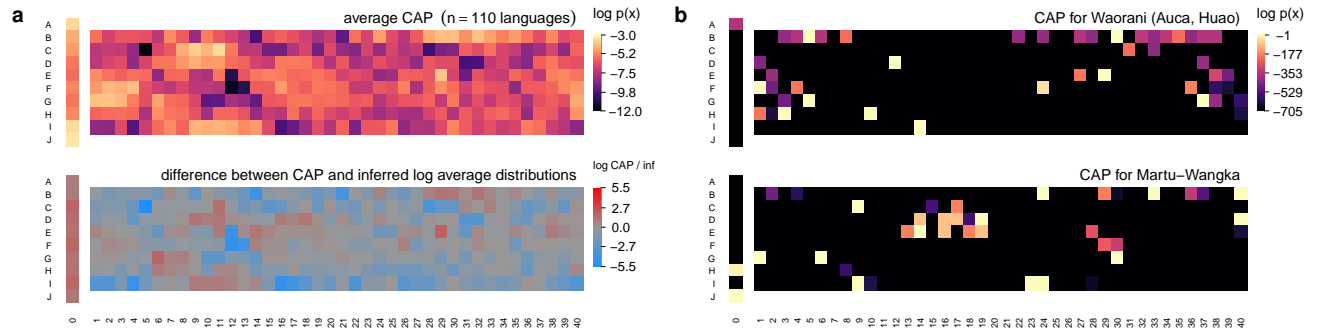

**Figure C4. Comparison to the capacity maximizing distributions (“capacity achieving priors”) for WCS languages.** (a) (Top) Approximate replication of Fig. 3a from Zaslavsky et al. [17] showing capacity achieving prior (CAP) averaged across WCS languages (here we include all WCS languages; some were excluded in Zaslavsky et al. [17]). (Bottom) The difference between the average CAP and average prior we infer (see Fig. 2a) ranges over several orders of magnitude (log scale). (b) CAP distributions for two languages used as examples in Fig. 5a (note different scale). Under the CAP inference, two neighboring Munsell color chips may exhibit a  $10^{300}$ -fold difference in communicative need.

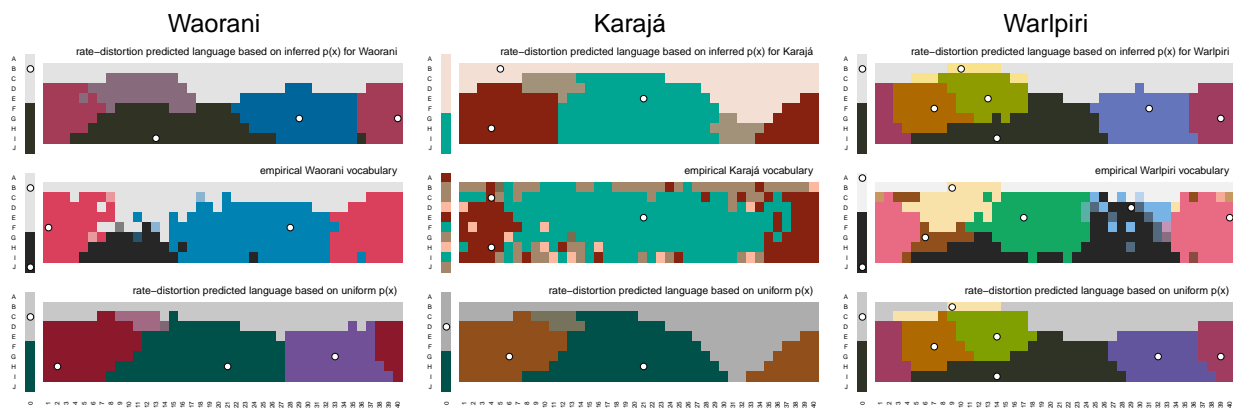

**Figure C5. Results for WCS languages previously identified in the literature as possible outliers.** RDBC results shown for the languages labeled in Fig. 3b (Pirahá shown in Fig. 2c). Prior work has hypothesized that Pirahá [21], Warlpiri [22], Waorani [23], and Karajá [23], may be exceptions in some way to the broad trends identified in the WCS. All but Warlpiri appear to be substantially improved when we account for language specific communicative needs.

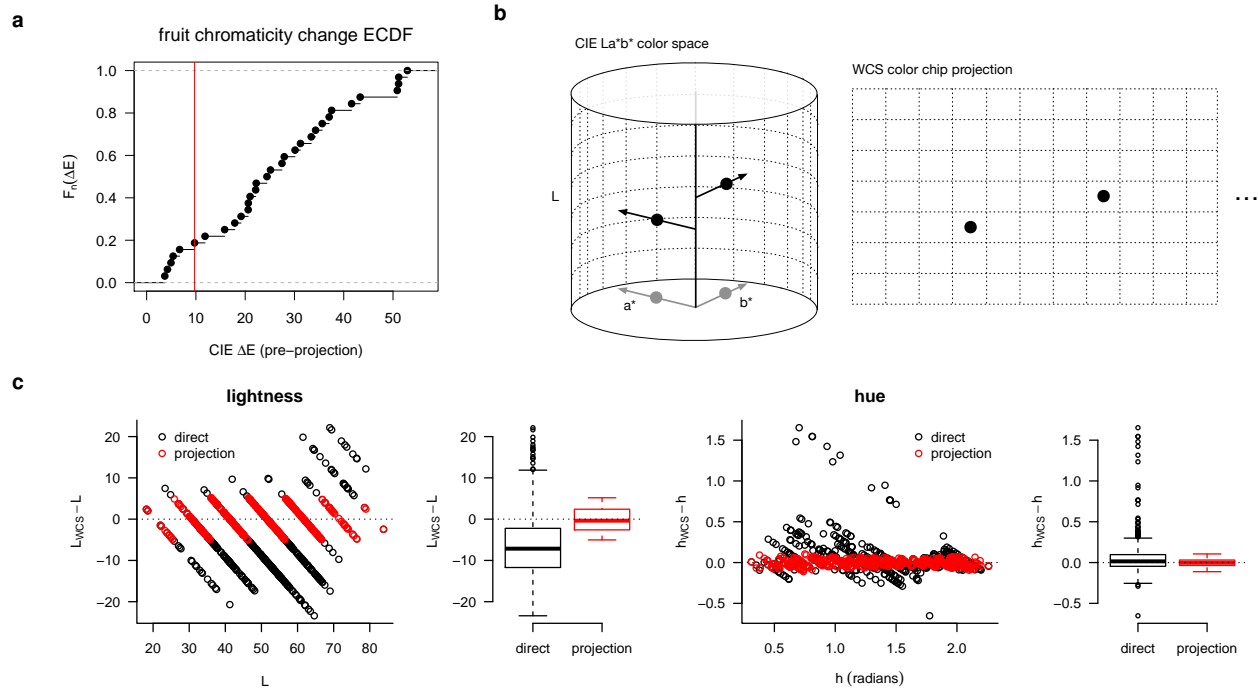

**Figure C6. Treatment of Sumner & Mollon fruit chromaticity measurements.** (a) Empirical cumulative distribution function (ECDF) of the change in fruit chromaticity between unripe and ripe states. Not all fruits signal ripeness by a change in chromaticity [24, 25]; other indicators may include size or smell. For each species collected by Sumner & Mollon having at least one measurement in each of the ‘unripe’ and ‘ripe’ classifications, the species’ chromaticity measurements is included in our analysis (Fig. 4c & d if the CIE Lab difference ( $\Delta E^*$ ) between the mean unripe and ripe measurements is greater than a threshold (red vertical line). This threshold is determined by the minimum  $\Delta E$  of a subset of the species measurements for which we could establish a significant change in mean CIE Lab coordinates at the  $p < 0.01$  level based on a Hotelling  $T^2$  test. (b) After conversion from spectral measurements to CIE Lab coordinates, the final step is to find the nearest WCS color chip in CIE Lab space. The WCS color chips form a high-saturation outer shell of the Munsell color array, privileging lightness (L) and hue angle over saturation. We adopt this same choice by selecting nearest neighbors based on L and hue angle (i.e. normalizing the ( $a^*$ ,  $b^*$ ) position sub-vector), ignoring saturation. (c) The choice of matching by projection rather than directly by  $\Delta E^*$  better constrains the difference in lightness (L) and hue (h) between the matched WCS color chips and the true CIE Lab coordinates, with the tradeoff of a small increase in the overall mean  $\Delta E^*$  (35.5 vs. 44.7). However this tradeoff appears to be necessary to make meaningful comparisons between fruit ripeness categories; without projection there is substantial variation in the residuals as a function of L and h. Box-plots show median and first and third quartiles; whiskers extend to the minimum (maximum) up to 1.5 times the interquartile range, with outliers shown as individual points.

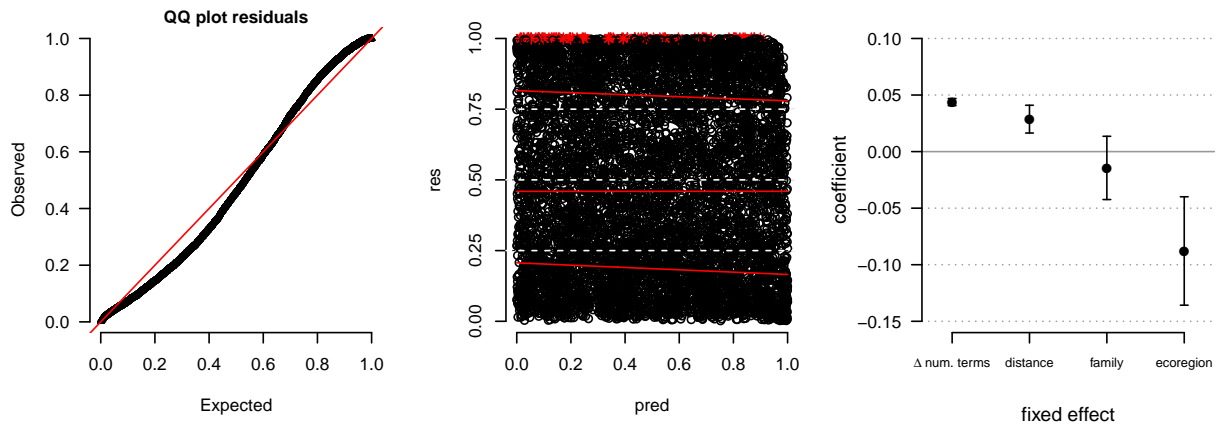

**Figure C7. Diagnostics for GLMM of differences in communicative need between languages.** (Left) Uniform quantile–quantile (QQ) plot of expected vs. observed GLMM model residuals. (Middle) Rank transformed model predicted values (pred) vs. residuals (res), with quantile regressions (red lines) compared to theoretical quantiles (dashed white lines at 0.25, 0.50, and 0.75); simulation outliers shown as red stars. (Right) Fixed effect coefficients and 95% confidence intervals for geodesic distance (Haversine method; standardized units), shared linguistic family (TRUE=1, FALSE=0), and shared ecoregion (TRUE=1, FALSE=0). Positive coefficients indicate an increase in dissimilarity (increase in Wasserstein distance), while negative coefficients indicate a decrease. Out of  $n = 125^2$  language pairs, 73% and 60% shared the same linguistic family or ecoregion, respectively. Variance inflation factors (VIFs) for distance, family, and ecoregion were 1.291, 1.219, 1.149, respectively. All VIFs are less than 5, showing low multicollinearity.

### 1151 **C.6.1 Communicative efficiency (surprisal)**

1152 Gibson et al. [20] sought to understand communicative needs by estimating communicative efficiency, or surprisal,  
1153 defined as

$$S(x) = - \sum_{\hat{x}} p(\hat{x}|x) \log p(x|\hat{x}), \quad (73)$$

1154 (Eq. 1 of Gibson et al. 2017), where  $x$  are color stimuli (i.e. the WCS color chips),  $\hat{x}$  are color terms, and  
1155  $p(x|\hat{x}) \propto p(\hat{x}|x)$  by Bayes rule under the assumption of a uniform  $p(x)$ . This is distinct from our work, where  
1156 by “communicative needs” we in fact mean the quantity  $p(x)$  – namely, the chance that a speaker needs to reference  
1157 color  $x$  – which we infer directly for individual languages by maximum entropy (SI Sec. B). Nevertheless, we can  
1158 ask whether surprisal  $S(x)$  is predictive of the language-specific communicative needs we infer. While we do find a  
1159 moderate positive correlation (Pearson’s  $\rho = 0.41$ ;  $n = 36,300$ ; see SI Fig. C8a), the vast majority of variance in needs  
1160  $p(x)$  remains unexplained ( $1 - R^2 = 0.83$ ). The substantial differences between these two quantities explains why  
1161 the needs that we infer have a comparatively weak correlation with the warm-cool trend in colors of salient objects,  
1162 whereas the warm-cool trend is stronger for the surprisal measure.

### 1163 **C.6.2 Color saturation (chroma)**

1164 The WCS color chip stimuli were chosen to cover a range of Munsell lightness values and hues at approximately  
1165 maximal “saturation” (Munsell chroma). Maximal color saturation, or chroma, thus varies as a function of Munsell  
1166 lightness value and hue for these stimuli. Our inference of communicative needs depends on the positions of color  
1167 chips used in the WCS. One concern, then, might be that the variation in color saturation, or chroma, in some way  
1168 directly determines our inferred communicative needs. If this were the case, then we would expect to find a systematic  
1169 relationship between inferred language-specific communicative needs and Munsell chroma. But we do not find any  
1170 systematic relationship (SI Fig. C8b), even though the highest values of chroma tend to correspond to high values of  
1171  $p(x)$ . This relationship for high chroma values may reflect the observation that participants choice of focal colors can  
1172 be biased towards highly saturated colors [26]. Or it could alternatively, or additionally, reflect a common cause in the  
1173 determinants of communicative needs and perceptual discrimination.

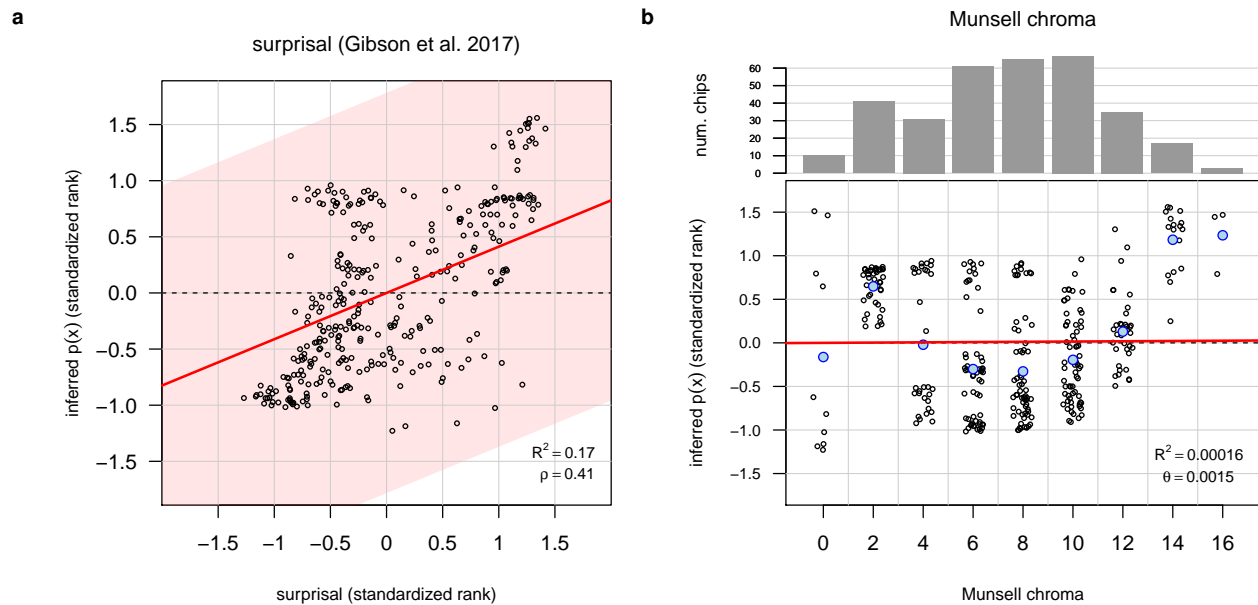

**Figure C8. Relationship of inferred language-specific communicative needs to surprisal (Gibson et al. 2017) and color saturation of WCS stimuli (Munsell chroma).** (a) Surprisal is moderately correlated, but not strongly predictive, of inferred communicative needs. Red line and legend show linear relationship between standardized rank values; light-red area indicates 95% prediction interval. Points show average (over languages) standardized rank inferred communicative needs (y-axis) compared with average (over languages) standardized rank surprisal (x-axis) for each WCS color chip. (b) Munsell chroma (color saturation) of WCS stimuli are not predictive of language-specific inferred communicative needs. Red line and legend describe linear relationship based on 110 languages and 330 color chips per language;  $n = 36,300$  total comparisons. Points show the Munsell chroma (+ jitter; x-axis) and average (over languages) standardized rank inferred communicative needs for each WCS color chip (y-axis). Standardized ranks are computed per language. The total number of WCS color chips of each Munsell chroma used in the WCS is shown at top. Blue points show expected values of inferred communicative needs by Munsell chroma. Expected values are poor summaries for intermediate chroma values due to multi-modality.

## 1174 D Comparison to alternative approaches

1175 In this section we provide additional discussion and comparison of our approach to inferring communicative needs  
 1176 with prior approaches. While past work proposed methods in the context of approximating a single, global distribution  
 1177 of need [7, 17, 27], it is reasonable to consider whether or not those approaches could also be used to estimate  
 1178 language-specific needs. First, for intuition, we provide a brief derivation of an analytical solution to Zaslavsky et  
 1179 al.’s word-frequency (WF) approach [17] for the special case of “hard” category boundaries, i.e.  $p(\hat{x}|x)$  equal to either  
 1180 1 or 0 only. Second, we give illustrative examples comparing our approach with that of WF [17] and CAP [7] for  
 1181 inference of communicative needs and prediction of color naming maps. Finally, we provide a systematic comparison  
 1182 of estimation methods for communicative needs when word frequencies are unknown (which is the case for almost all  
 1183 languages in the WCS).

### 1184 D.1 Analytical solution for a special case of the WF method

1185 The WF method [17] approximates communicative needs by finding the maximum entropy distribution over colors,  $x$ ,  
 1186 such that the marginalization of the joint distribution formed by measured term maps,  $p(\hat{x}|x)$ , and estimated  $p_{WF}(x)$ ,  
 1187 matches the measured word frequencies,  $p(\hat{x})$ ; i.e., such that  $p(\hat{x}) = \sum_x p(\hat{x}|x)p_{WF}(x)$ . The method assumes that  
 1188 word frequencies  $p(\hat{x})$  are known. By Lagrange multipliers, one can show that solutions (for “hard” or “soft” condi-  
 1189 tions), must have the form  $p_{WF}(x) \propto \exp[\sum_{\hat{x}} \nu(\hat{x})p(\hat{x}|x)]$ , where the constant of proportionality normalizes  $p_{WF}(x)$ ,  
 1190 and  $\nu(\hat{x})$  are Lagrange multipliers that need to be chosen to enforce the constraint that  $p(\hat{x}) = \sum_x p(\hat{x}|x)p_{WF}(x)$ .

1191 Let  $\mu$  be the constant of proportionality; in the case of hard clustering, let  $\hat{x}(x)$  denote the one nonzero  $\hat{x}$  for a given  
 1192  $x$ ’s  $p(\hat{x}|x)$  distribution; and with a slight abuse of notation, let  $x \in \hat{x}$  indicate the set of all  $x$  s.t.  $p(\hat{x}|x) = 1$ . Then for  
 1193 hard clustering we can decompose the constraint into two parts,

$$p(\hat{x}) = \sum_{x \in \hat{x}} p(\hat{x}|x)\mu^{-1}e^{\nu(\hat{x})p(\hat{x}|x)} + \sum_{x \notin \hat{x}} p(\hat{x}|x)\mu^{-1}e^{\nu(\hat{x}(x))p(\hat{x}(x)|x)}, \quad (74)$$

$$= \mu^{-1}e^{\nu(\hat{x})} \sum_{x \in \hat{x}} p(\hat{x}|x), \quad (75)$$

$$\nu(\hat{x}) = \log \frac{p(\hat{x})\mu}{\sum_{x \in \hat{x}} p(\hat{x}|x)}, \quad (76)$$

1194 where the second step follows because (for hard clustering)  $p(\hat{x}|x) = 1$  for any  $x \in \hat{x}$  and  $= 0$  for any  $x \notin \hat{x}$ . Then  
 1195 after plugging this into the form of the solution and cancelling out  $\mu$ , we have

$$p_{WF}(x) = \frac{p(\hat{x}(x))}{\sum_{x' \in \hat{x}(x)} p(\hat{x}(x)|x')}, \quad (77)$$

1196 where the denominator simplifies to  $\sum_{x'} p(\hat{x}(x)|x') = |\{x \in \hat{x}\}|$ . In words, the maximum entropy solution for hard  
 1197 clustering under the WF constraints simply apportions the frequency of a word,  $p(\hat{x})$ , evenly across its domain as  
 1198 given by  $p(\hat{x}|x)$ . This analytical solution for the hard clustering case gives a helpful intuition for understanding the  
 1199 performance of WF more generally, as we describe in the subsequent two sections.

### 1200 D.2 Illustrative comparison of approaches for language-specific needs

1201 Here, we consider two illustrative examples of our inference method and model predictions in comparison to past  
 1202 work, where the ground truth is known. For each example, we generated a simple, arbitrary ground truth distribution  
 1203 of communicative needs over a unit square domain. (We consider a comparison across a more diverse set of system-  
 1204 atically generated examples in the subsequent section, SI Section D.3). In the first example, shown in SI Fig. D9a,  
 1205 the true distribution of communicative needs has a maximum near the top right, and a minimum near the bottom left.  
 1206 The ground truth RDBC for this example provides just three categories (centroids and largest-likelihood  $p(\hat{x}|x)$  shown  
 1207 with unique colors). Without using knowledge of the term map,  $p(\hat{x}|x)$ , our inference method is able to recover the  
 1208 coarse features of the true distribution of needs. The WF method approximately evenly divides the frequency of each  
 1209 term,  $p(\hat{x})$ , across its mapped domain,  $p(\hat{x}|x)$ , similar to the “hard” partitioning case solved analytically in SI Sec-  
 1210 tion D.1. The CAP method exponentially concentrates probability mass away from the boundaries between terms (all  
 1211 distributions in SI Fig. D9 are shown on a log scale).



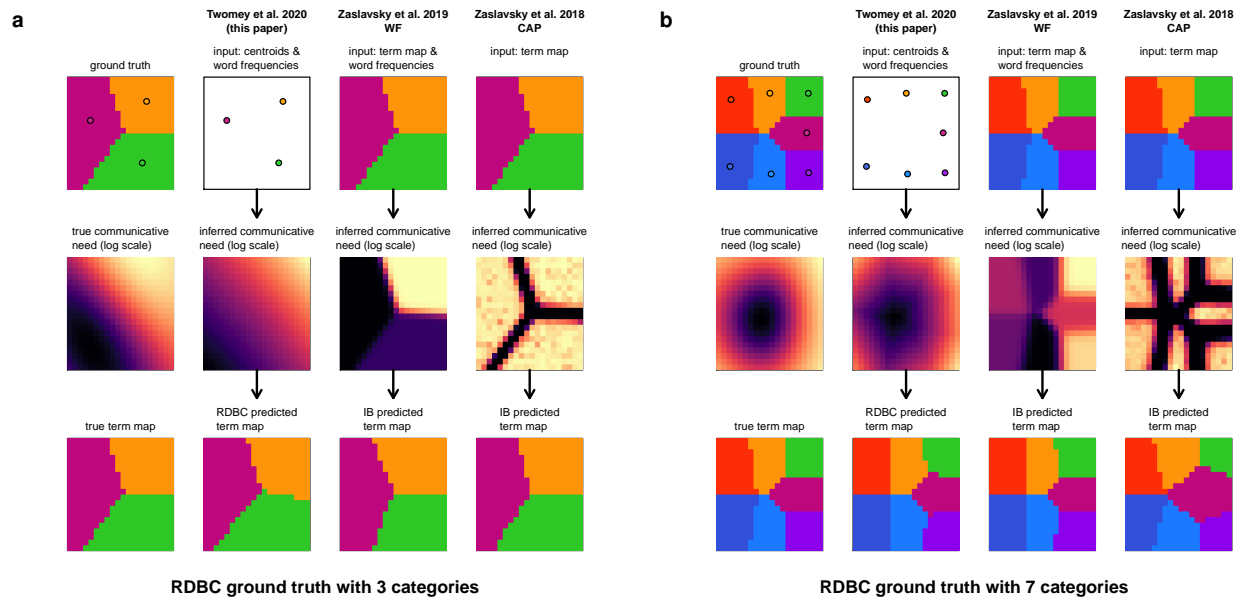

**Figure D9. Comparison of methods for inference of communicative needs and prediction of term maps, when the ground truth is known.**

(a) A rate-distortion optimal “vocabulary” with three terms for the unit square is shown at top-left, with category centroids (points) and best-choice term maps (colored regions). The true distribution of communicative needs,  $p(x)$ , is shown in the middle row (ground truth). Our inference method (second column) takes as input the category centroids and, if available, their frequencies,  $p(\hat{x})$ , and produces an estimate of communicative need (middle row, same column). Our model of color naming then predicts term maps (bottom row, same column) using the inferred communicative need. Inferences based on the word-frequency based approach of Zaslavsky et al. [17] (third column), and the CAP approach of Zaslavsky et al. [7] (fourth column) do not accurately reconstruct the true distribution of needs. These two methods each use the IB model for prediction of term maps. Note that for language-specific communicative needs, term maps would necessarily be inputs for both the WF and CAP methods, leading to circularity in prediction of term maps. (b) A seven-term vocabulary example.

1212 In these examples, the ground truth rate-distortion Bregman clustering (RDBC) is based on a squared-error measure  
 1213 of distortion. It then seems surprising that predictions of term maps using the CAP distribution, which does not well  
 1214 approximate the ground truth communicative need distribution, nonetheless closely resemble the true term mapping,  
 1215  $p(\hat{x}|x)$ , when using with the information bottleneck (IB) model proposed in Zaslavsky et al. [7]. Under the IB model,  
 1216 categories are not characterized by a centroid at a single point in space, but by a distribution over all points in space,  
 1217 which gives a large degree of additional flexibility. When coupled with language-specific inferences based on e.g. CAP,  
 1218 this evidently allows for recovery of the ground truth term maps despite the difference between the true generative  
 1219 process (based on centroids at single points in space with distortion measured by squared-error between points) in this  
 1220 example and the process specified by the IB model (based on mixtures of Gaussians over all points in space, with  
 1221 distortion measured by the KL-divergence between Gaussian mixtures). More critically, the requirement of empirical  
 1222 term maps,  $p(\hat{x}|x)$ , as inputs for both the CAP and WF approaches necessarily leads to circularity if these methods are  
 1223 then used for predicting language term maps based on language-specific inferences of communicative need.

### 1224 D.3 Systematic comparison of approaches for language-specific needs

1225 The examples shown in SI Fig. D9 and earlier in SI Fig. B1 illustrate the relative performance of our method, the  
 1226 WF approach, and CAP, under a few ideal test conditions. Next, we conduct a systematic investigation of these  
 1227 three methods controlling for the level of spatial detail in the ground truth distributions of communicative need, and  
 1228 withholding information about  $p(\hat{x})$ , which is unknown for virtually all WCS languages, from all inference methods.  
 1229 Ground truth distributions were generated on a log scale from sinusoids with random phase and amplitude below a  
 1230 given spatial frequency. Distributions were scaled such that entropy was held constant across all generated examples  
 1231 for all spatial frequency cutoffs. This scaling fixes the KL-divergence between each generated ground truth distribution  
 1232 and uniformity at a constant, providing a consistent scale across examples.

1233 SI Fig. D10 shows the KL-divergence between the distributions of communicative need recovered by each method  
 1234 and the generated ground truth distribution, as a percentage of the divergence between uniformity and ground truth,

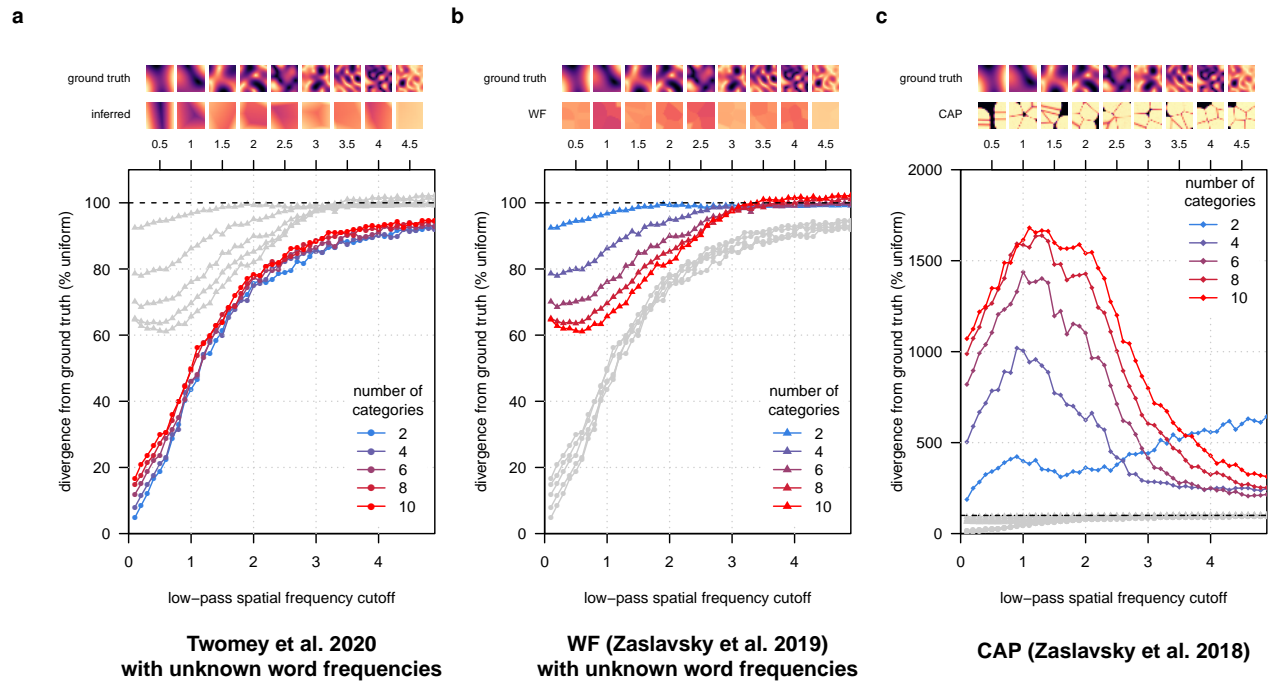

**Figure D10. Systematic comparison of inference methods for language-specific communicative needs when word frequencies are unknown (e.g. in the WCS).** Ground truth distributions of communicative need were generated with spatial variation up to a given cutoff spatial frequency (x-axis), and scaled such that the entropy was held constant across all generated examples. Accuracy of inference (y-axis; lower is better) is measured as the KL-divergence between inferred versus ground truth communicative needs, for each example, expressed as a percentage of the KL-divergence between uniform and ground truth (dashed line at 100%). Curves are shown for inferences based on rate-distortion vocabularies for 2, 4, 6, 8, and 10 “words” (number of categories) are unknown. **(a)** Inferences using the method proposed in this paper (Twomey et al.); **(b)** based on the word-frequency (WF) method of Zaslavsky et al. [17]; and **(c)** based on the CAP approach of Zaslavsky et al. [7]. For language-specific inferences, our method achieves high accuracy for recovering low-frequency information about the true communicative need, and it does so in a manner that is invariant to the number of available “words” (categories).

1235 averaged over 500 examples at each spatial frequency cutoff. Our method (SI Fig. D10a) recovers the low-frequency  
 1236 features of the ground truth distribution even when  $p(\hat{x})$  is unknown (assumed uniform) and in a manner that is  
 1237 relatively insensitive to the number of categories (number of terms) of the RDBC on which it is based. High-frequency  
 1238 information is lost, as expected, though recovery of low-frequency information across all spatial frequency cutoffs  
 1239 always improves estimates over uniform.

1240 By contrast, the WF method (SI Fig. D10b) is highly sensitive to the number of categories available to it through  
 1241  $p(\hat{x}|x)$ , and it requires a large number of categories to improve by even 40% over uniform when  $p(\hat{x})$  is unknown (as-  
 1242 sumed uniform). High spatial frequency information is lost, and when word frequencies are unknown this apparently  
 1243 inhibits recovery of low-frequency information as well. Performance at intermediate scales can approach our method  
 1244 for large enough vocabularies (number of categories), but even at these scales our method provides consistently better  
 1245 performance across vocabulary sizes. Inferences by CAP (SI Fig. D10c) never improve over uniform and they are  
 1246 highly sensitive to vocabulary size (number of categories).

## 1247 References

- 1248 1. Shannon, C. E. (1948) A mathematical theory of communication. *Bell System Technical Journal*, **27**(3):379–423.
- 1249 2. Shannon, C. E. (1959) Coding theorems for a discrete source with a fidelity criterion. *IRE National Convention Record*, **7**(4):142–163.
- 1250 3. Banerjee, A., Merugu, S., Dhillon, I. S., & Ghosh, J. (2005) Clustering with bregman divergences. *J. Mach. Learn. Res.*, **6**:1705–1749.
- 1251 4. Yendrikhovskij, S. N. (2001) Computing color categories from statistics of natural images. *J. Imaging Sci. Technol.*, **45**(5):409–417.
- 1252 5. Steels, L. & Belpaeme, T. (2005) Coordinating perceptually grounded categories through language: a case study for colour. *Behav. Brain Sci.*,  
1253 **28**(4):469–489.
- 1254 6. Regier, T., Kay, P., & Khetarpal, N. (2007) Color naming reflects optimal partitions of color space. *PNAS*, **104**(4):1436–1441.
- 1255 7. Zaslavsky, N., Kemp, C., Regier, T., & Tishby, N. (2018) Efficient compression in color naming and its evolution. *PNAS*, **115**(31):7937–7942.
- 1256 8. Boynton, R. M. & Olson, C. X. (1987) Locating basic colors in the osa space. *Color Res. Appl.*, **12**(2):94–105.
- 1257 9. Sturges, J. & Whitfield, T. W. A. (1995) Locating basic colours in the munsell space. *Color Res. Appl.*, **20**(6):364–376.
- 1258 10. Lindsey, D. T. & Brown, A. M. (2014) The color lexicon of american english. *J. Vision*, **14**(2):17, 1–25.
- 1259 11. Abbott, J. T., Griffiths, T. L., & Regier, T. (2016) Focal colors across languages are representative members of color categories. *PNAS*, **113**  
1260 (40):11178–11183.
- 1261 12. Agarwal, A. & Daumé III, H. (2010) A geometric view of conjugate priors. *Mach Learn*, **81**:99–113.
- 1262 13. Arimoto, S. (1972) An algorithm for computing the capacity of arbitrary discrete memoryless channels. *IEEE Trans. Inf. Theory*, **18**(1):14–20.
- 1263 14. Blahut, R. (1972) Computation of channel capacity and rate-distortion function. *IEEE Trans. Inf. Theory*, **18**(4):460–473.
- 1264 15. Csiszár, I. & Tusnády, G. (1984) Information geometry and alternating minimization procedures. *Statistics and Decisions*, **Supplement Issue**  
1265 **1**:205–237.
- 1266 16. Byrne, C. L. (2014) *Iterative optimization in inverse problems*. CRC Press, Boca Raton, FL.
- 1267 17. Zaslavsky, N., Kemp, C., Tishby, N., & Regier, T. (2019) Communicative need in colour naming. *Cogn. Neuropsychol.*, **37**(5-6):312–324.
- 1268 18. Powell, M. J. D. The BOBYQA algorithm for bound constrained optimization without derivatives. Technical report, Department of Applied  
1269 Mathematics and Theoretical Physics, Cambridge University, UK, (2009).
- 1270 19. Kay, P., Berlin, B., Maffi, L., & Merrifield, W. (1997) Color naming across languages. In Hardin, C. L. & Maffi, L., editors, *Color categories*  
1271 *in thought and language*, pages 21–56. Cambridge University Press, Cambridge. ISBN 9780521498005.
- 1272 20. Gibson, E., Futrell, R., Jara-Ettinger, J., Mahowald, K., Bergen, L., Ratnasingam, S., Gibson, M., Piantadosi, S. T., & Conway, B. R. (2017)  
1273 Color naming across languages reflects color use. *PNAS*, **114**(40):10785–10790.
- 1274 21. Everett, D. L. (2005) Cultural constraints on grammar and cognition in pirahã: another look at the design features of human language. *Curr.*  
1275 *Anthropol.*, **46**(4):621–646.
- 1276 22. Wierzbicka, A. (2008) Why there are no ‘colour universals’ in language and thought. *J. R. Anthropol. Inst.*, **14**(2):407–425.
- 1277 23. Regier, T., Kay, P., & Khetarpal, N. (2009) Color naming and the shape of color space. *Language*, **85**(4):884–892.
- 1278 24. Sumner, P. & Mollon, J. D. (2000) Catarrhine photopigments are optimized for detecting targets against a foliage background. *J. Exp. Biol.*,  
1279 **203**(13):1963–1986.
- 1280 25. Sumner, P. & Mollon, J. D. (2000) Chromaticity as a signal of ripeness in fruits taken by primates. *J. Exp. Biol.*, **203**(13):1987–2000.
- 1281 26. Witzel, C. (2019) Variation of saturation across hue affects unique and typical hue choices. *i-Perception*, **10**(5). doi: 10.1177/  
1282 2041669519872226.
- 1283 27. Zaslavsky, N., Kemp, C., Tishby, N., & Regier, T. (2018) Color naming reflects both perceptual structure and communicative need. *Cog. Sci.*,  
1284 **11**(1):207–219.

## 1285 E Language-specific inferences of communicative needs

1286 In the following figures (SI Fig. E11–E27), we show each of the 130 language-specific distributions of communicative  
1287 need we inferred using our method, for all languages recorded in the WCS and B&K survey data.

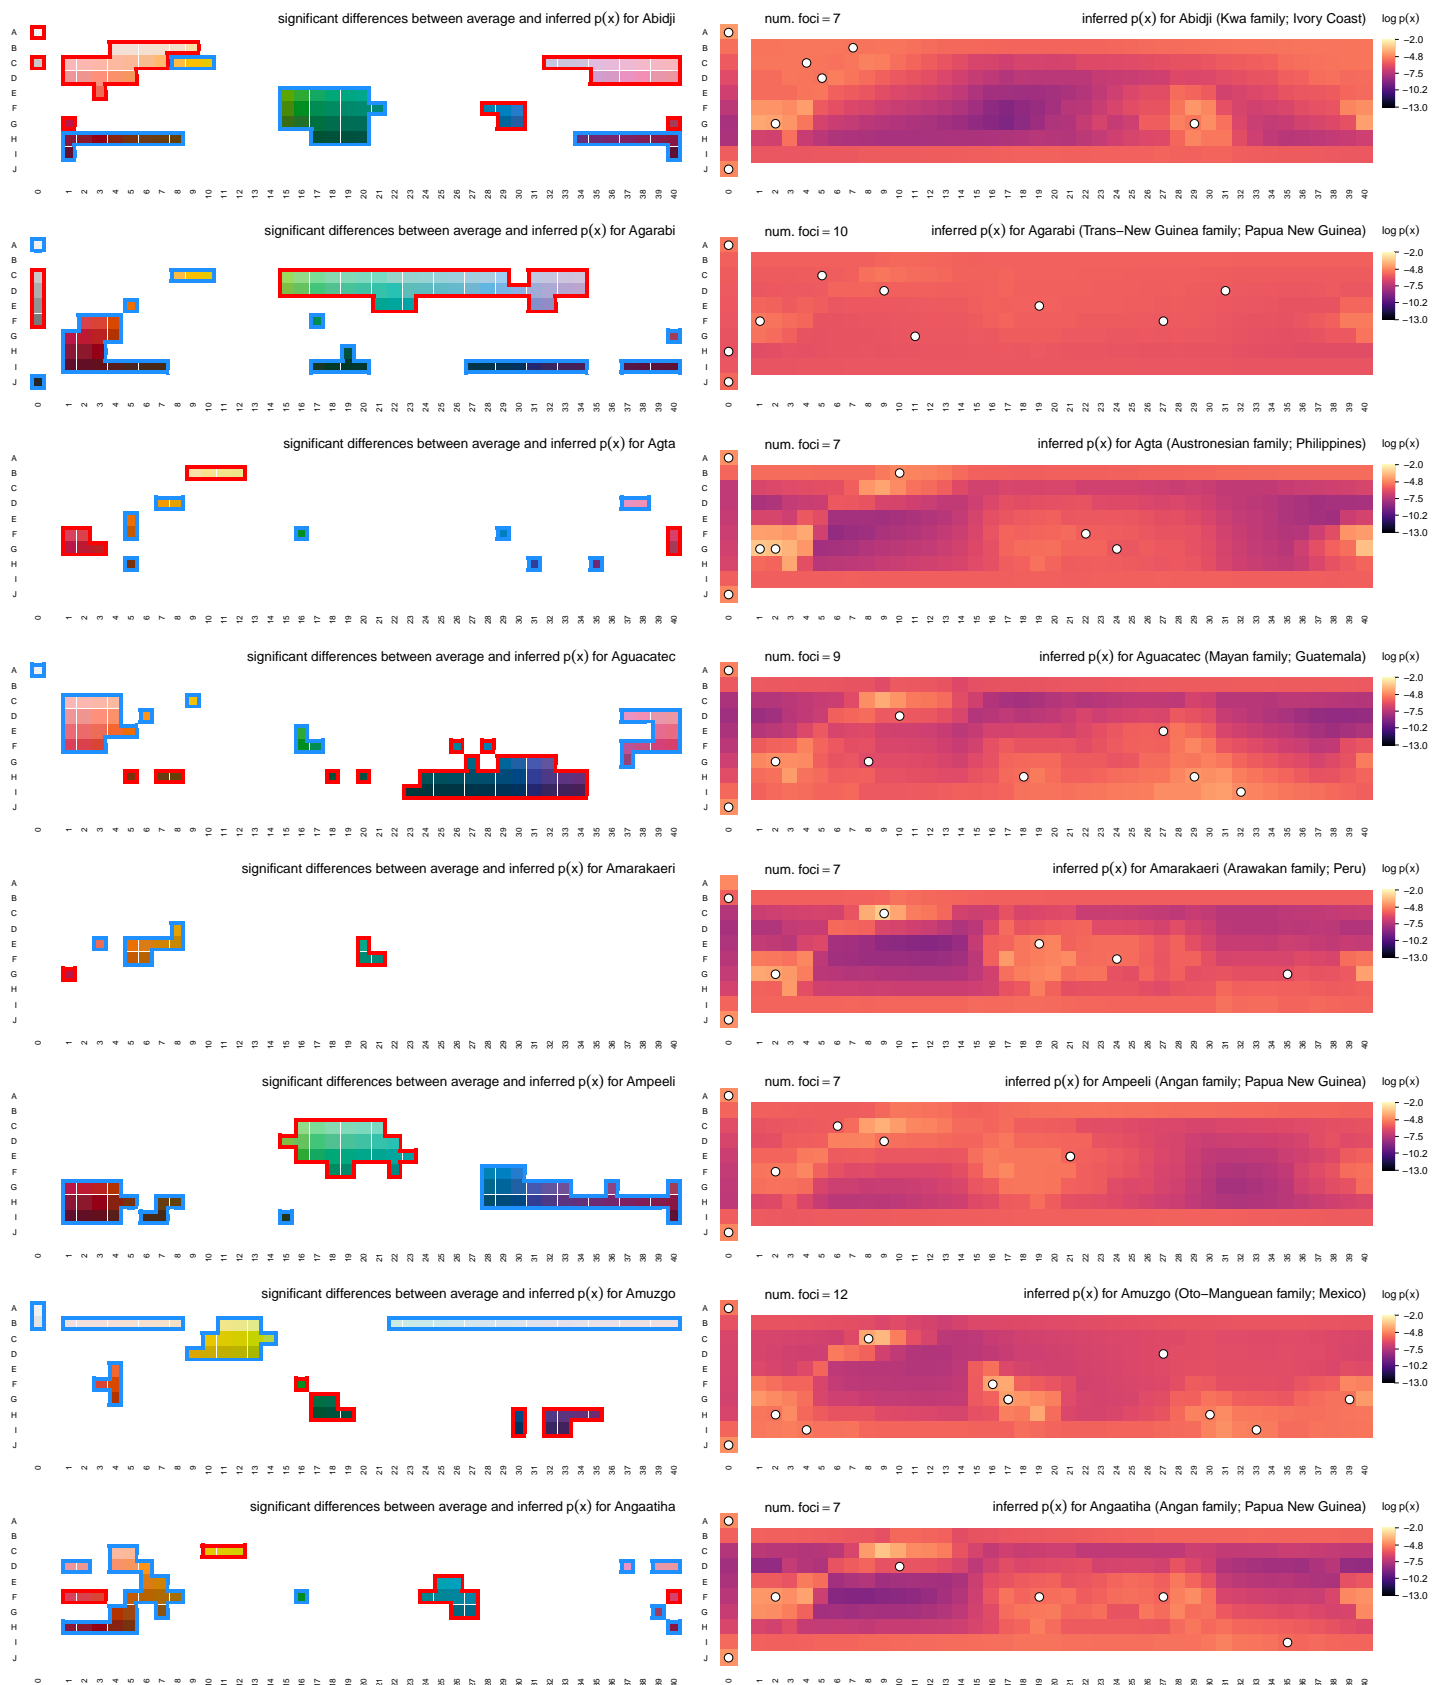

**Figure E11. Inferred communicative needs for 130 languages on a common scale.** Each row corresponds to a language in the combined WCS+B&K survey data. (Left column) Significant differences between language-specific and across-language average communicative needs, shown as in Fig. 5. Deviations that exceed  $\sigma/2$  with 95% confidence are highlighted in red (elevated) or blue (suppressed). (Right column) Language-specific communicative needs (log scale) shown with language focal color positions projected on to the WCS color chips (white points). Focal points may overlap on the same color chip.

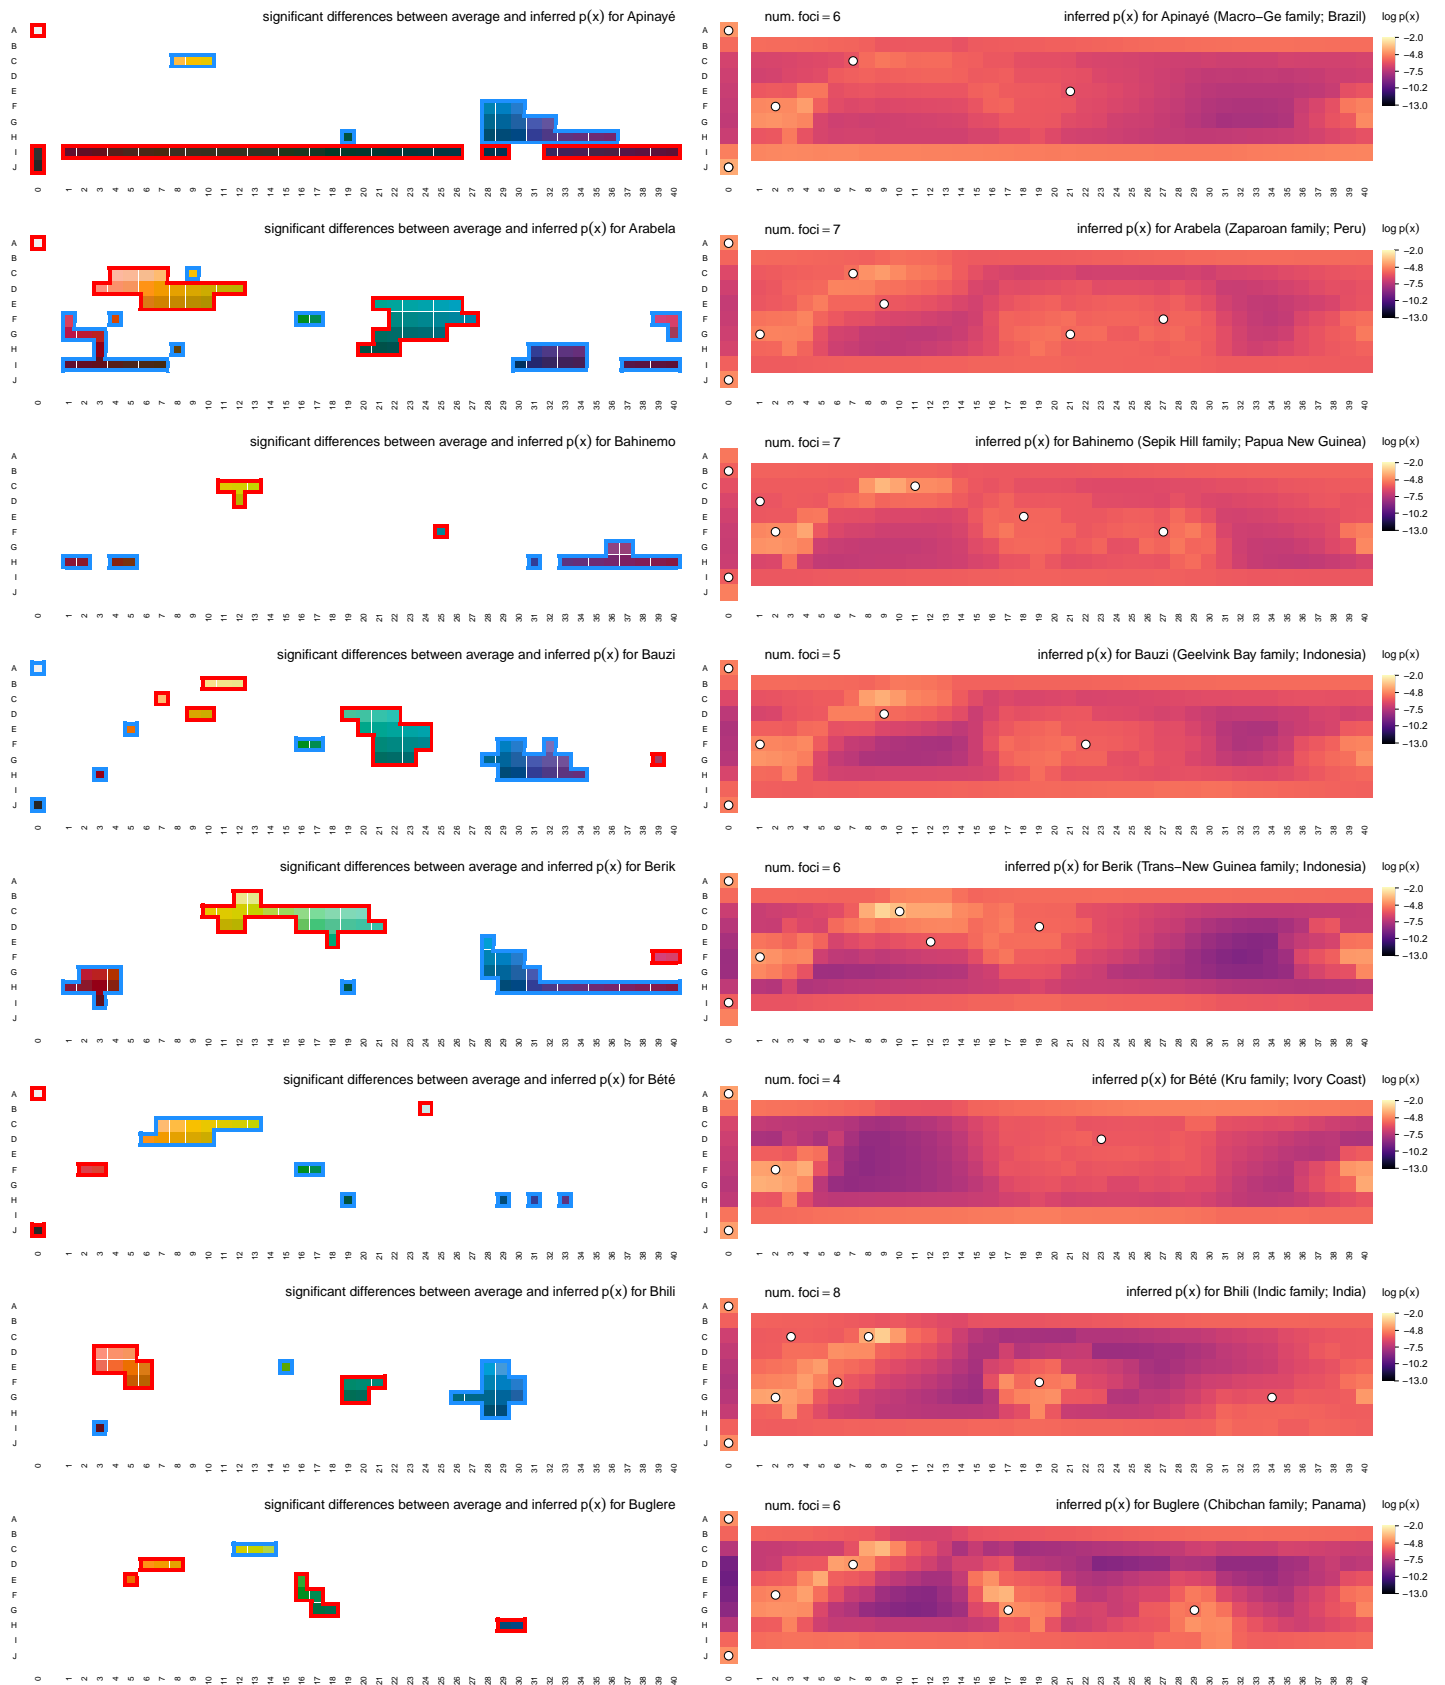

Figure E12. Inferred communicative needs for 130 languages on a common scale (continued).



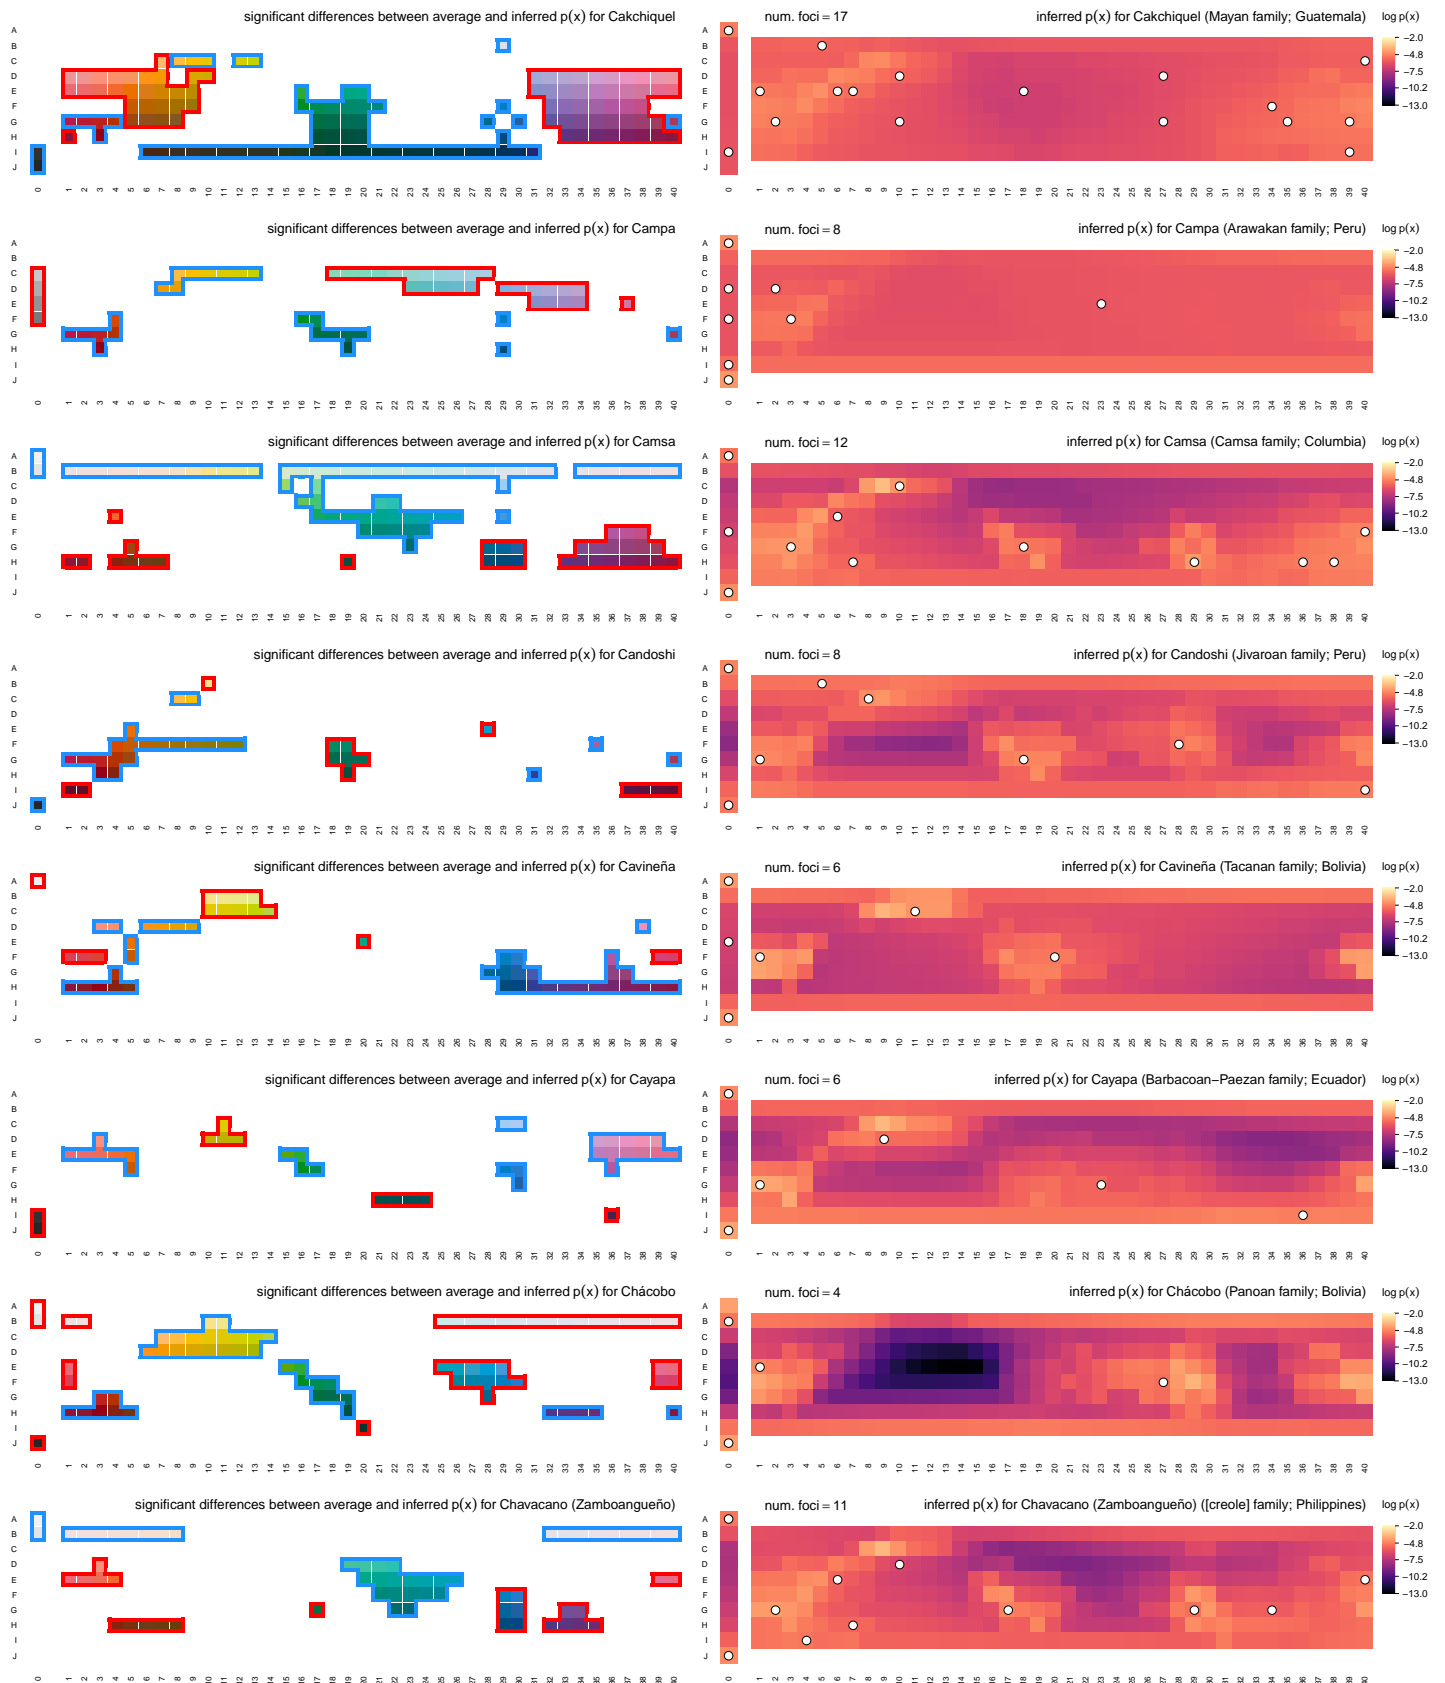

Figure E13. Inferred communicative needs for 130 languages on a common scale (continued).

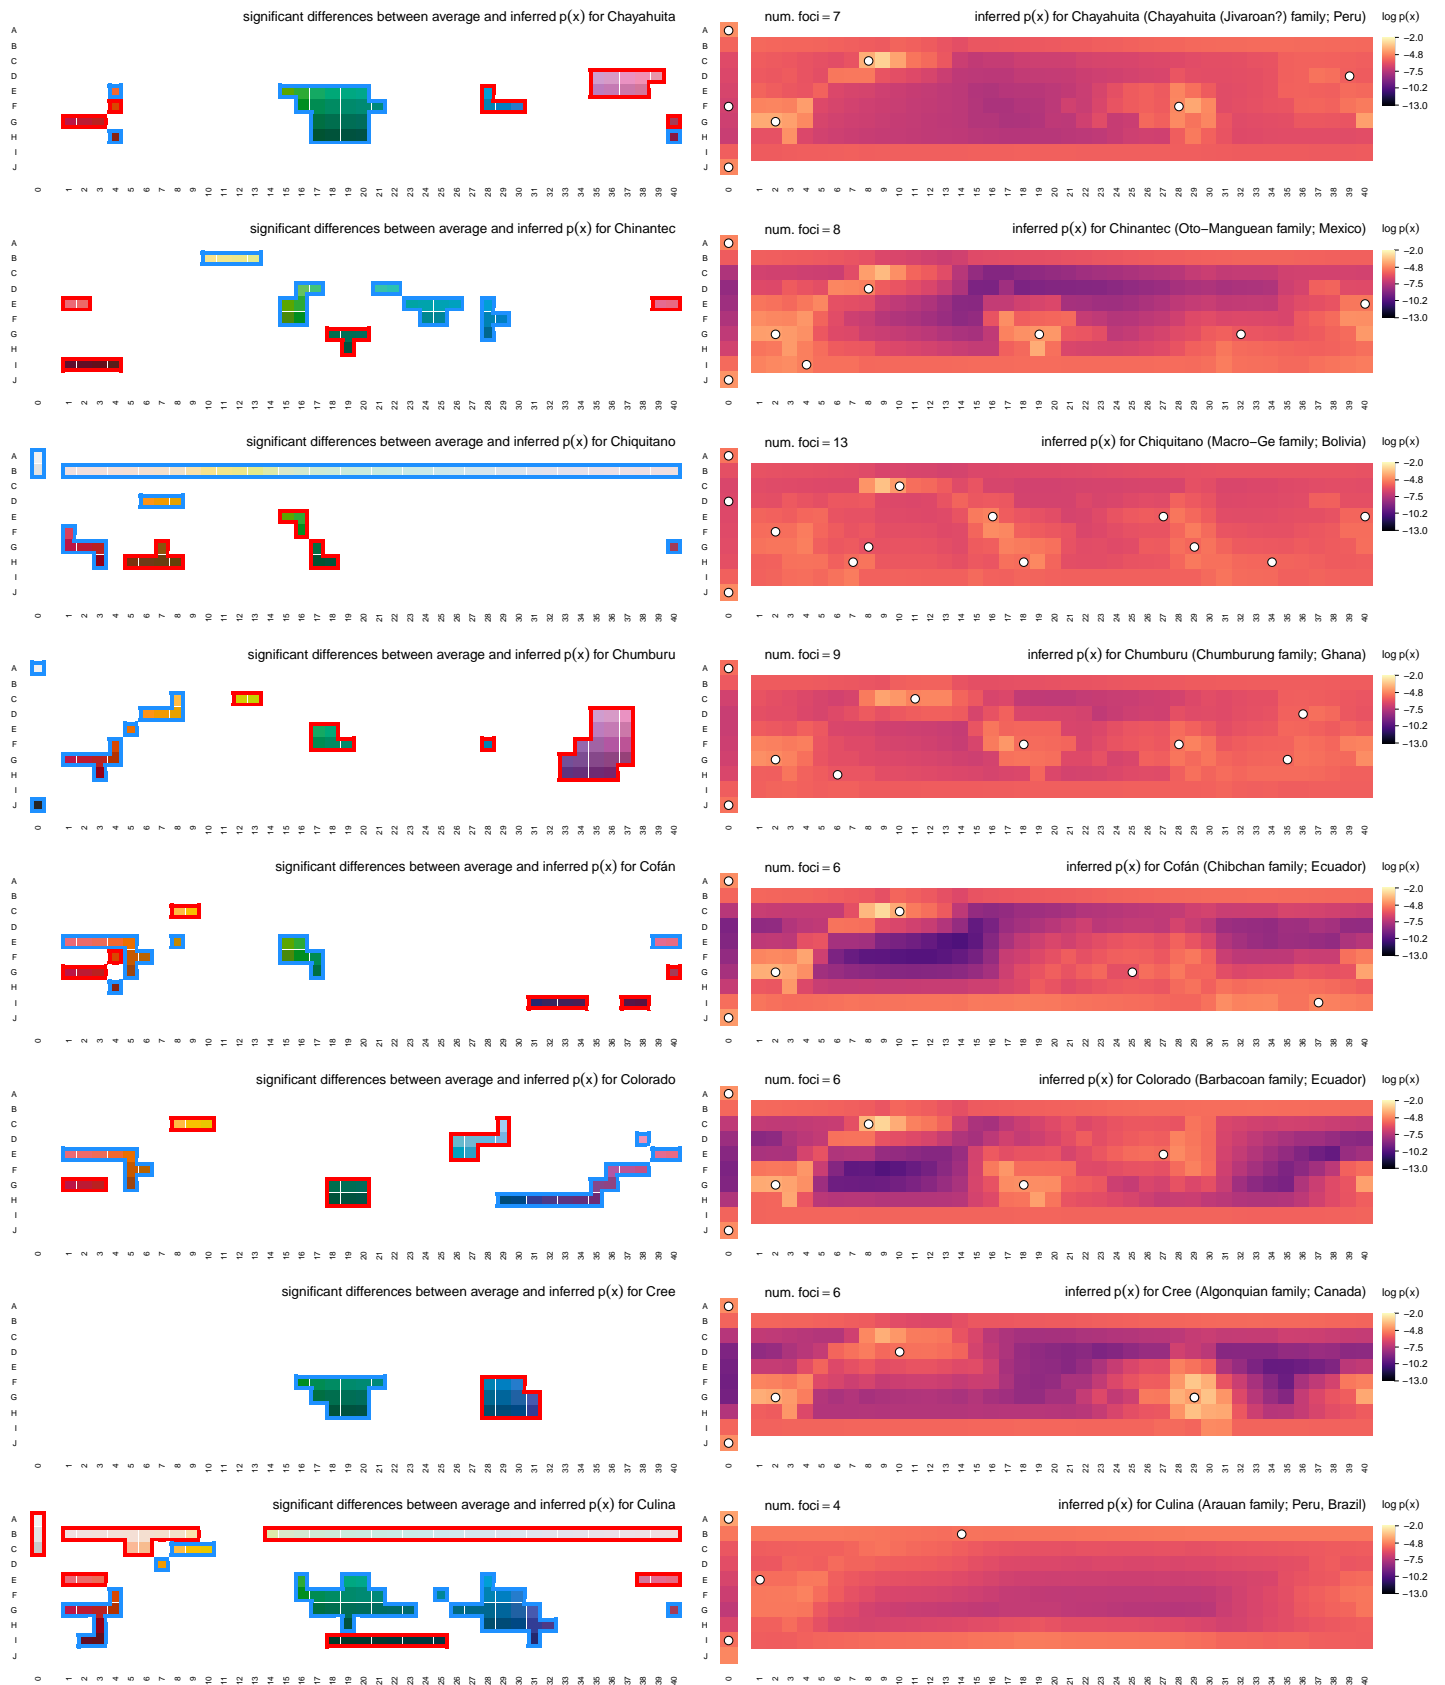

Figure E14. Inferred communicative needs for 130 languages on a common scale (continued).

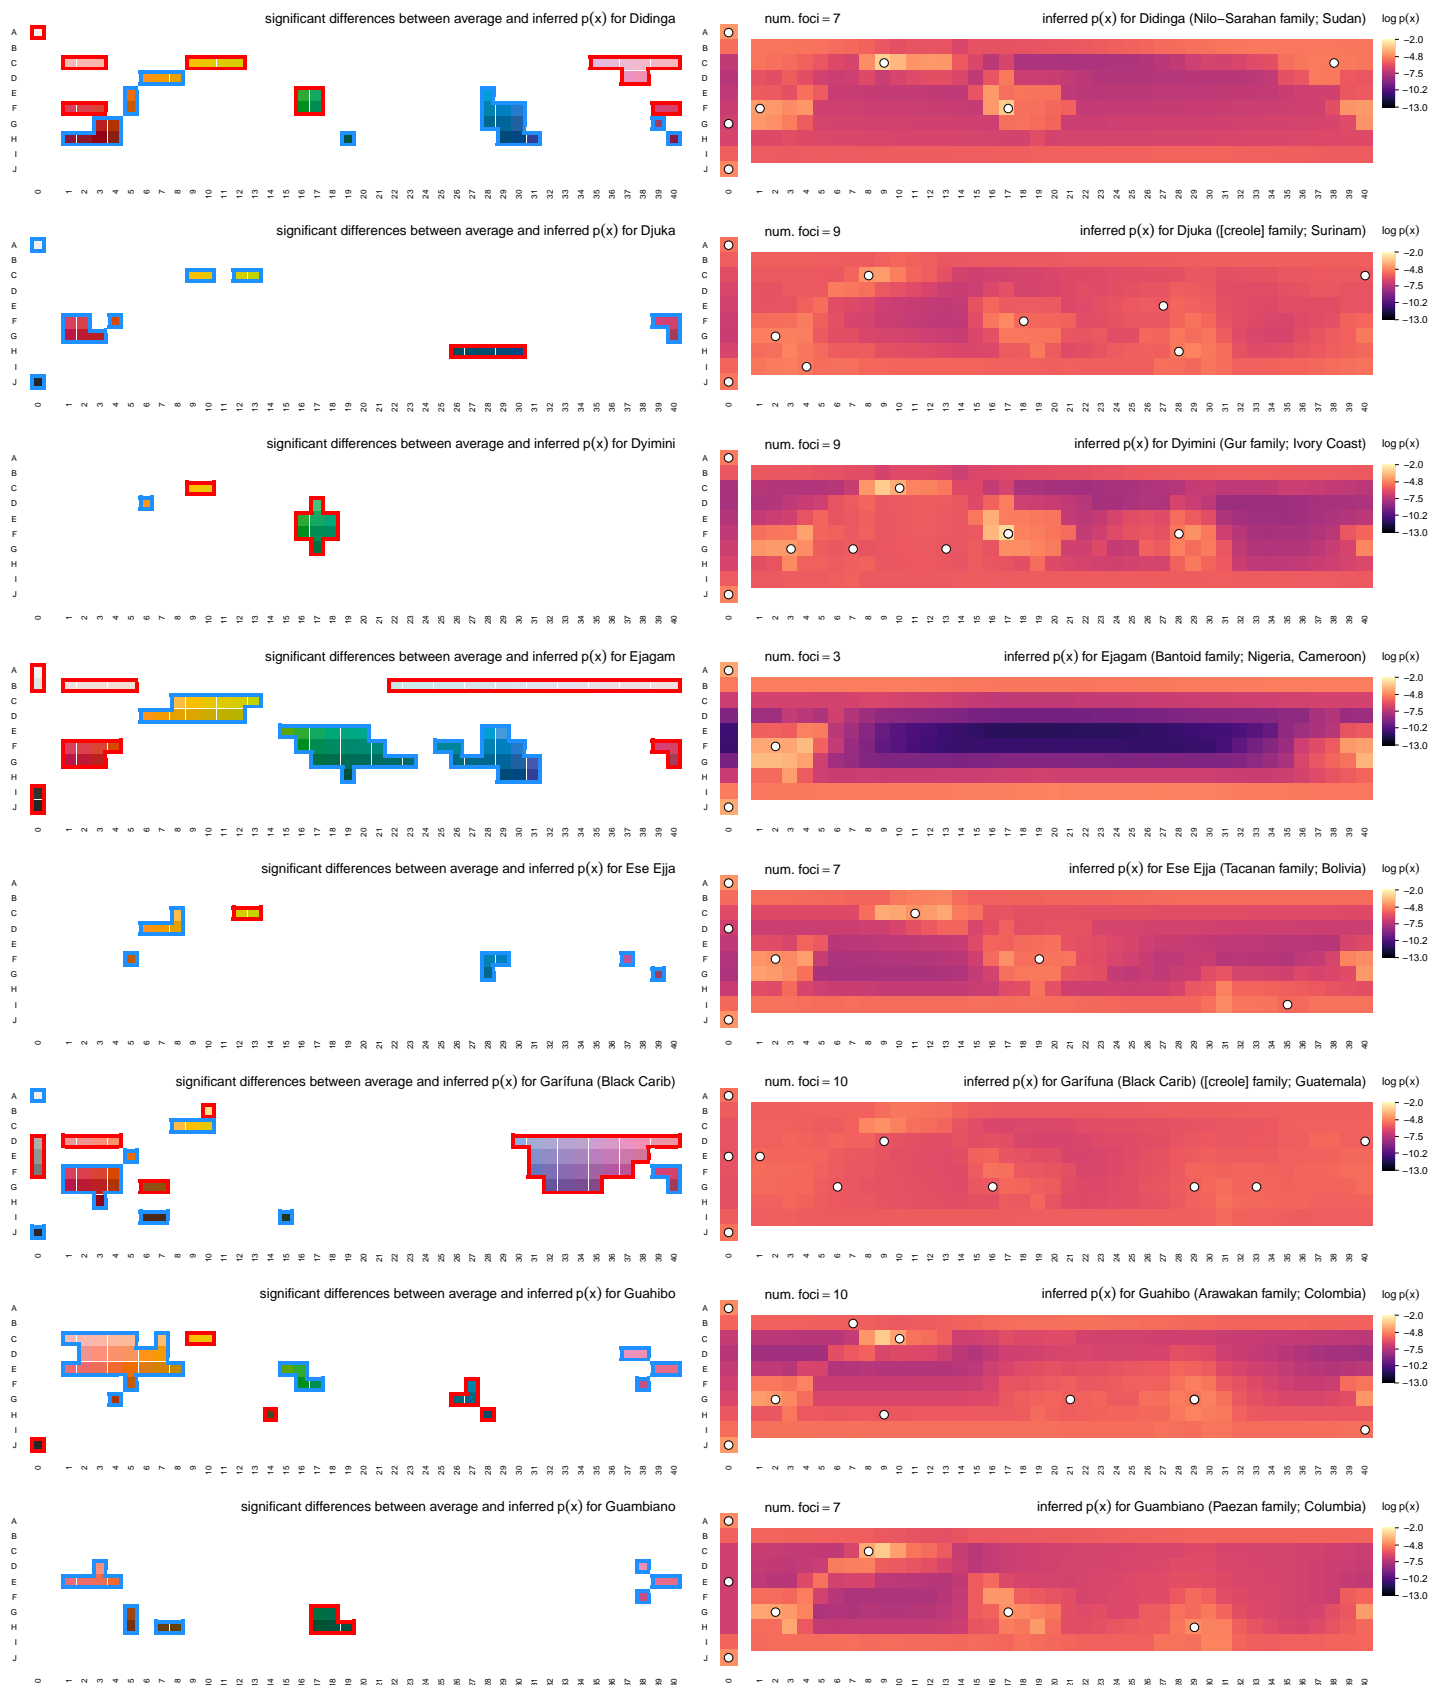

Figure E15. Inferred communicative needs for 130 languages on a common scale (continued).

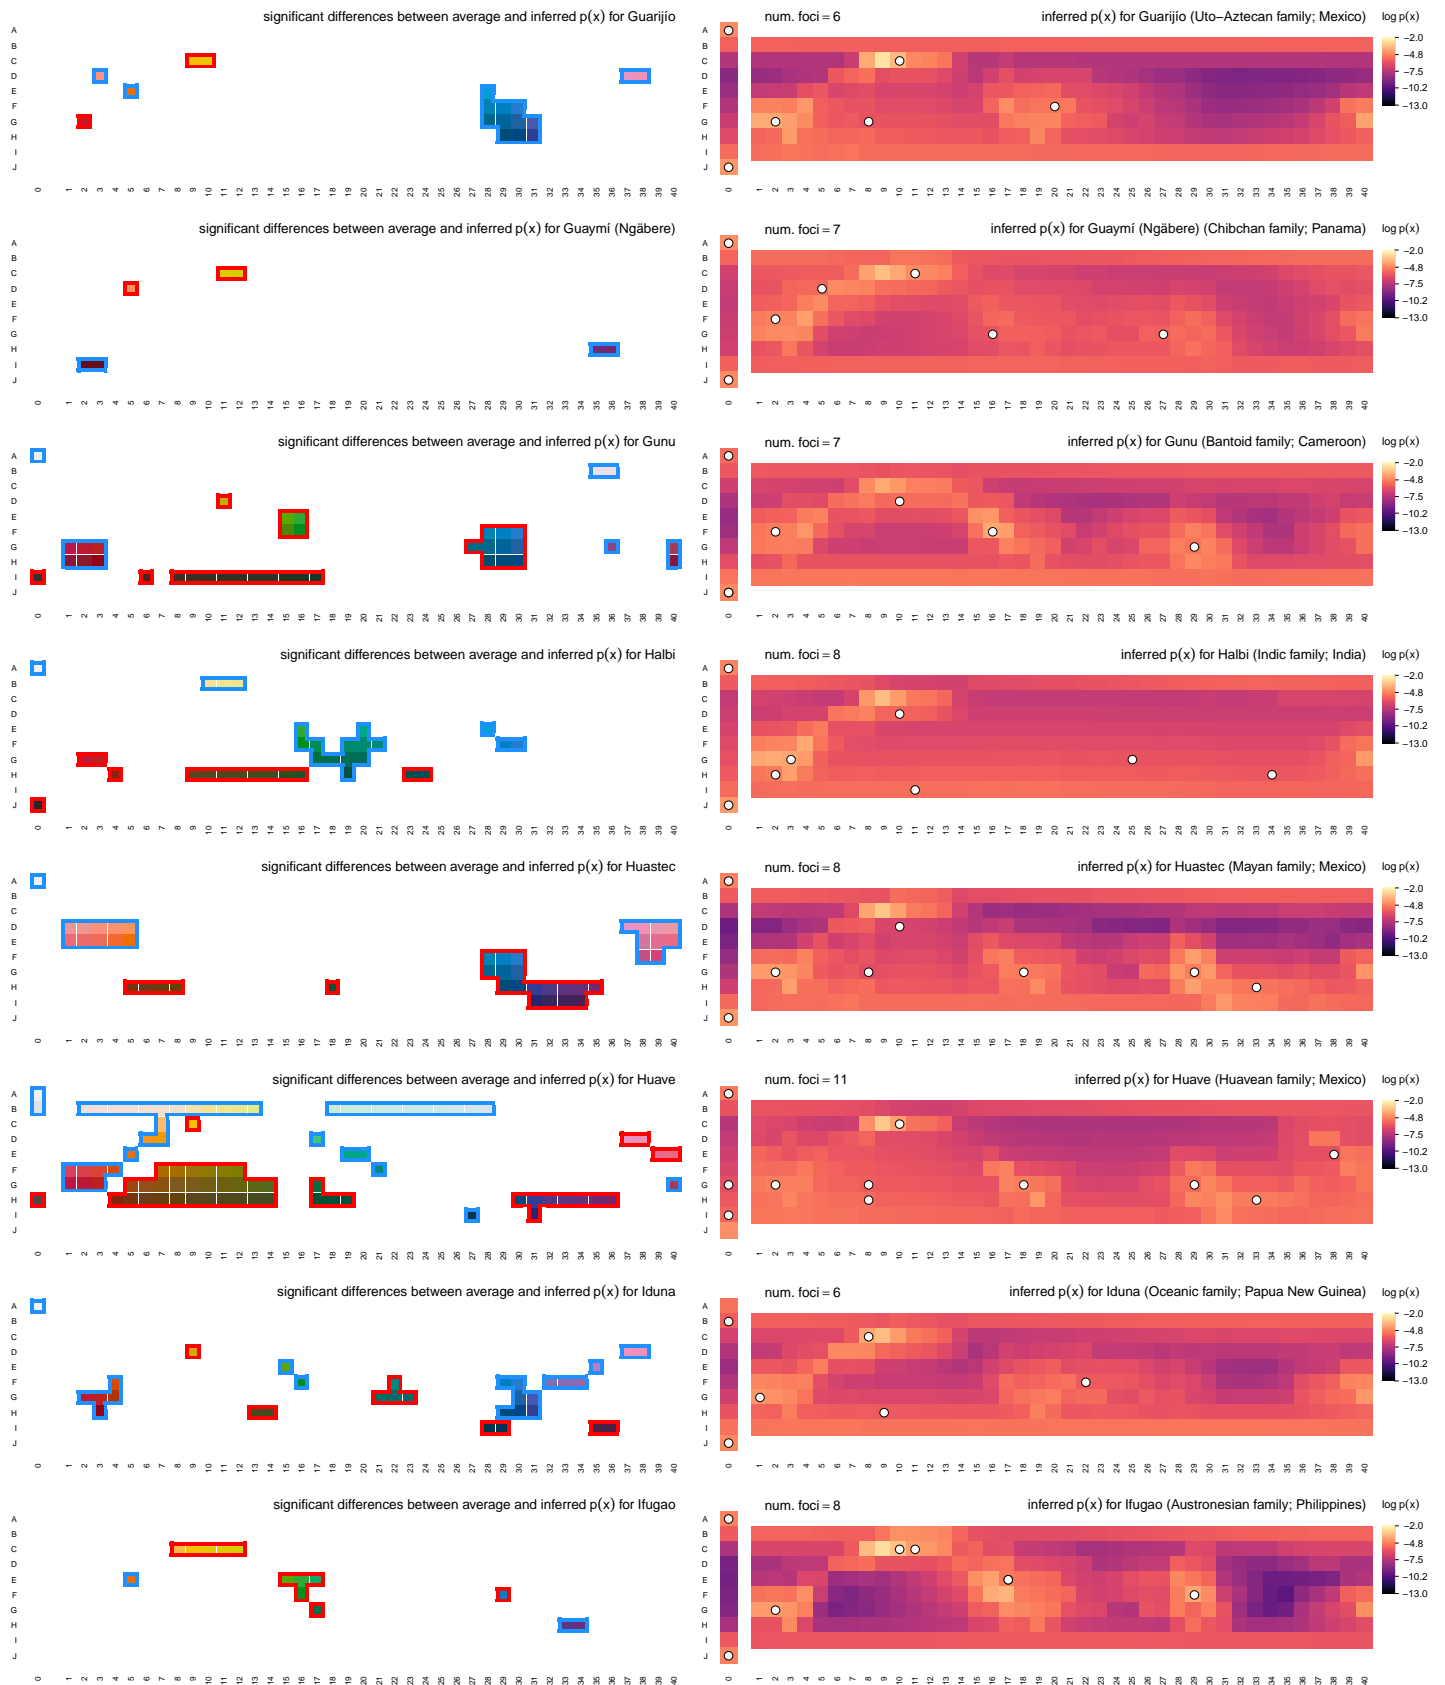

Figure E16. Inferred communicative needs for 130 languages on a common scale (continued).

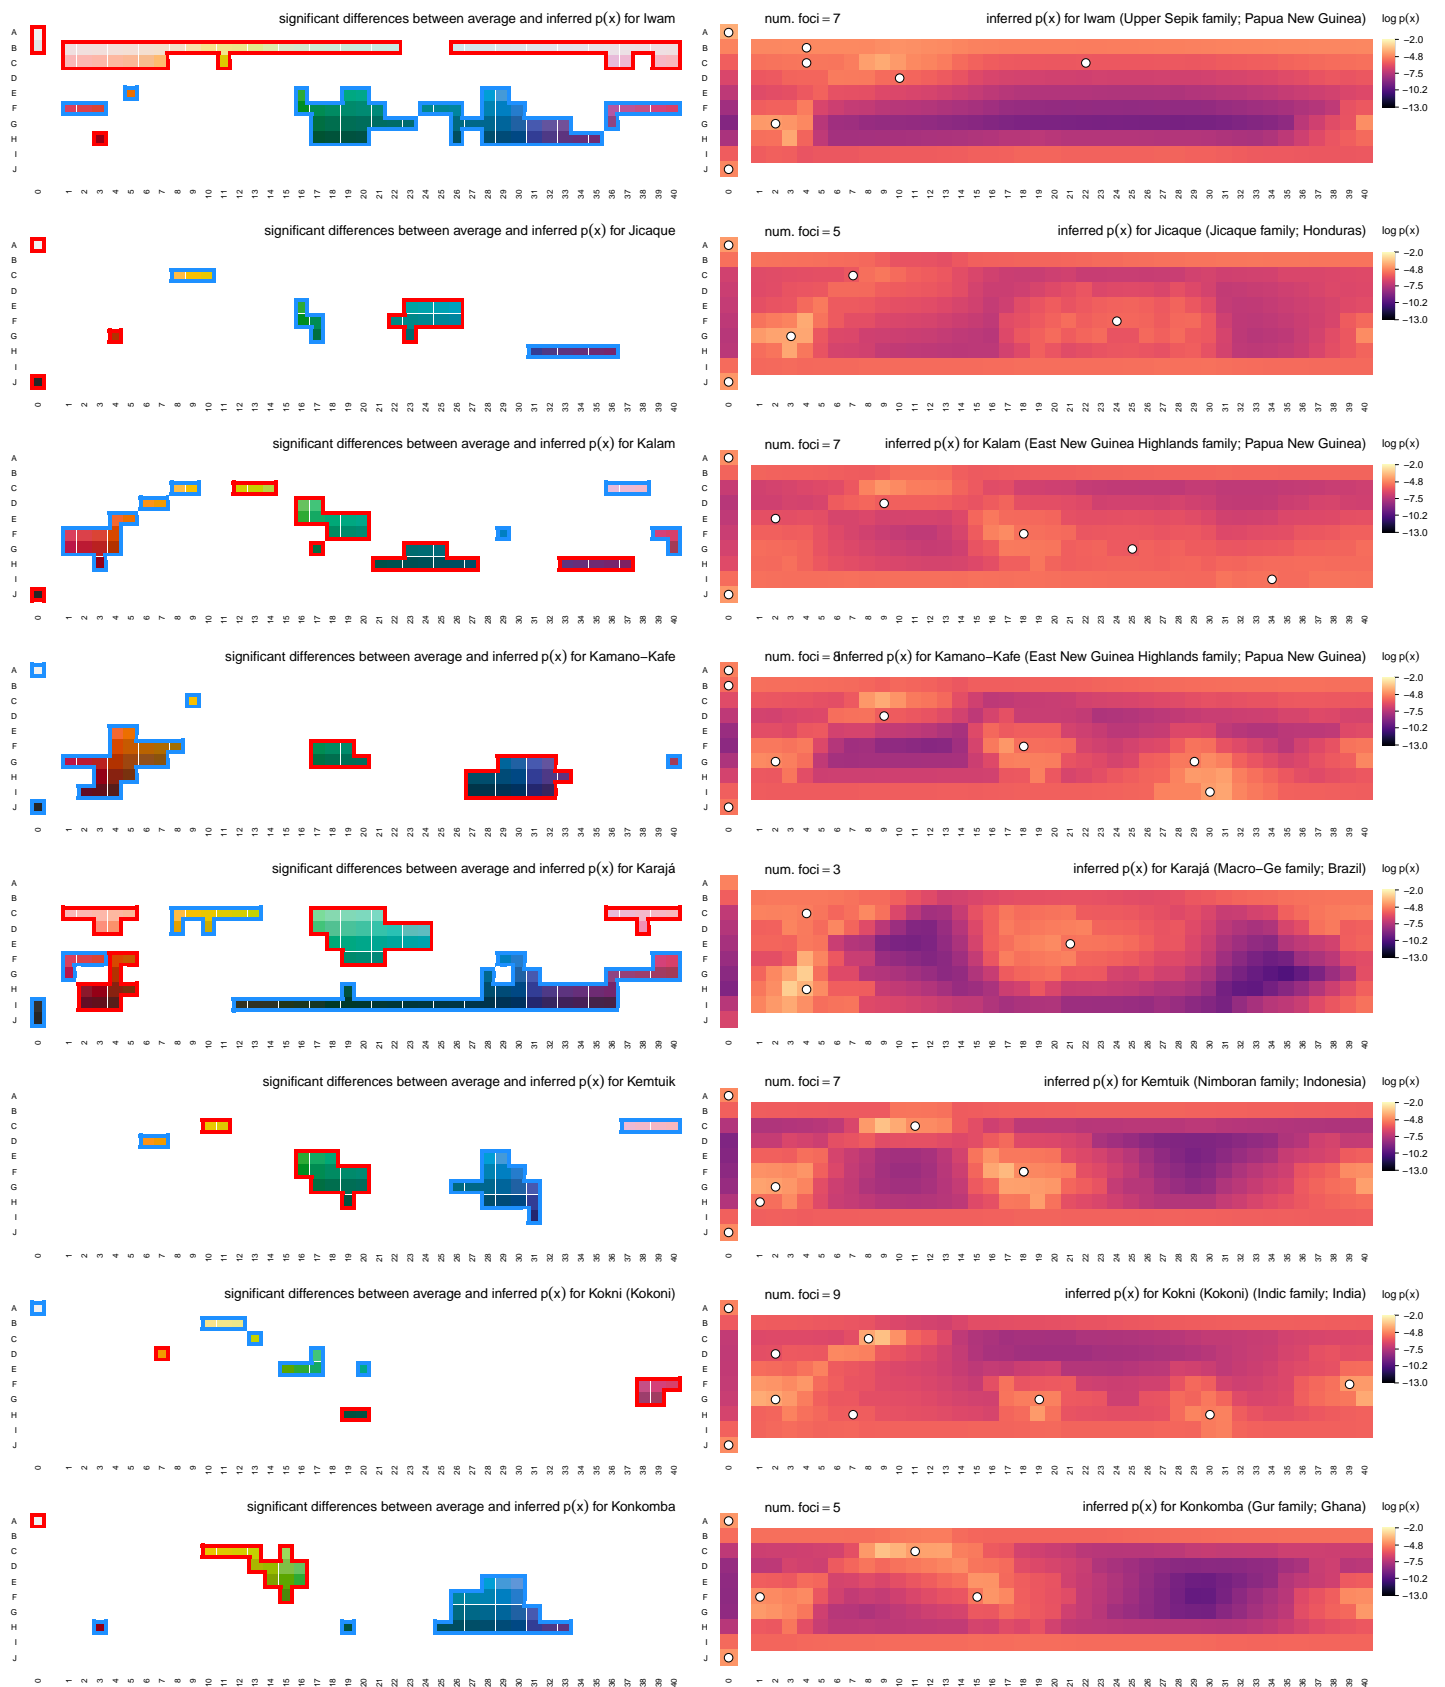

Figure E17. Inferred communicative needs for 130 languages on a common scale (continued).



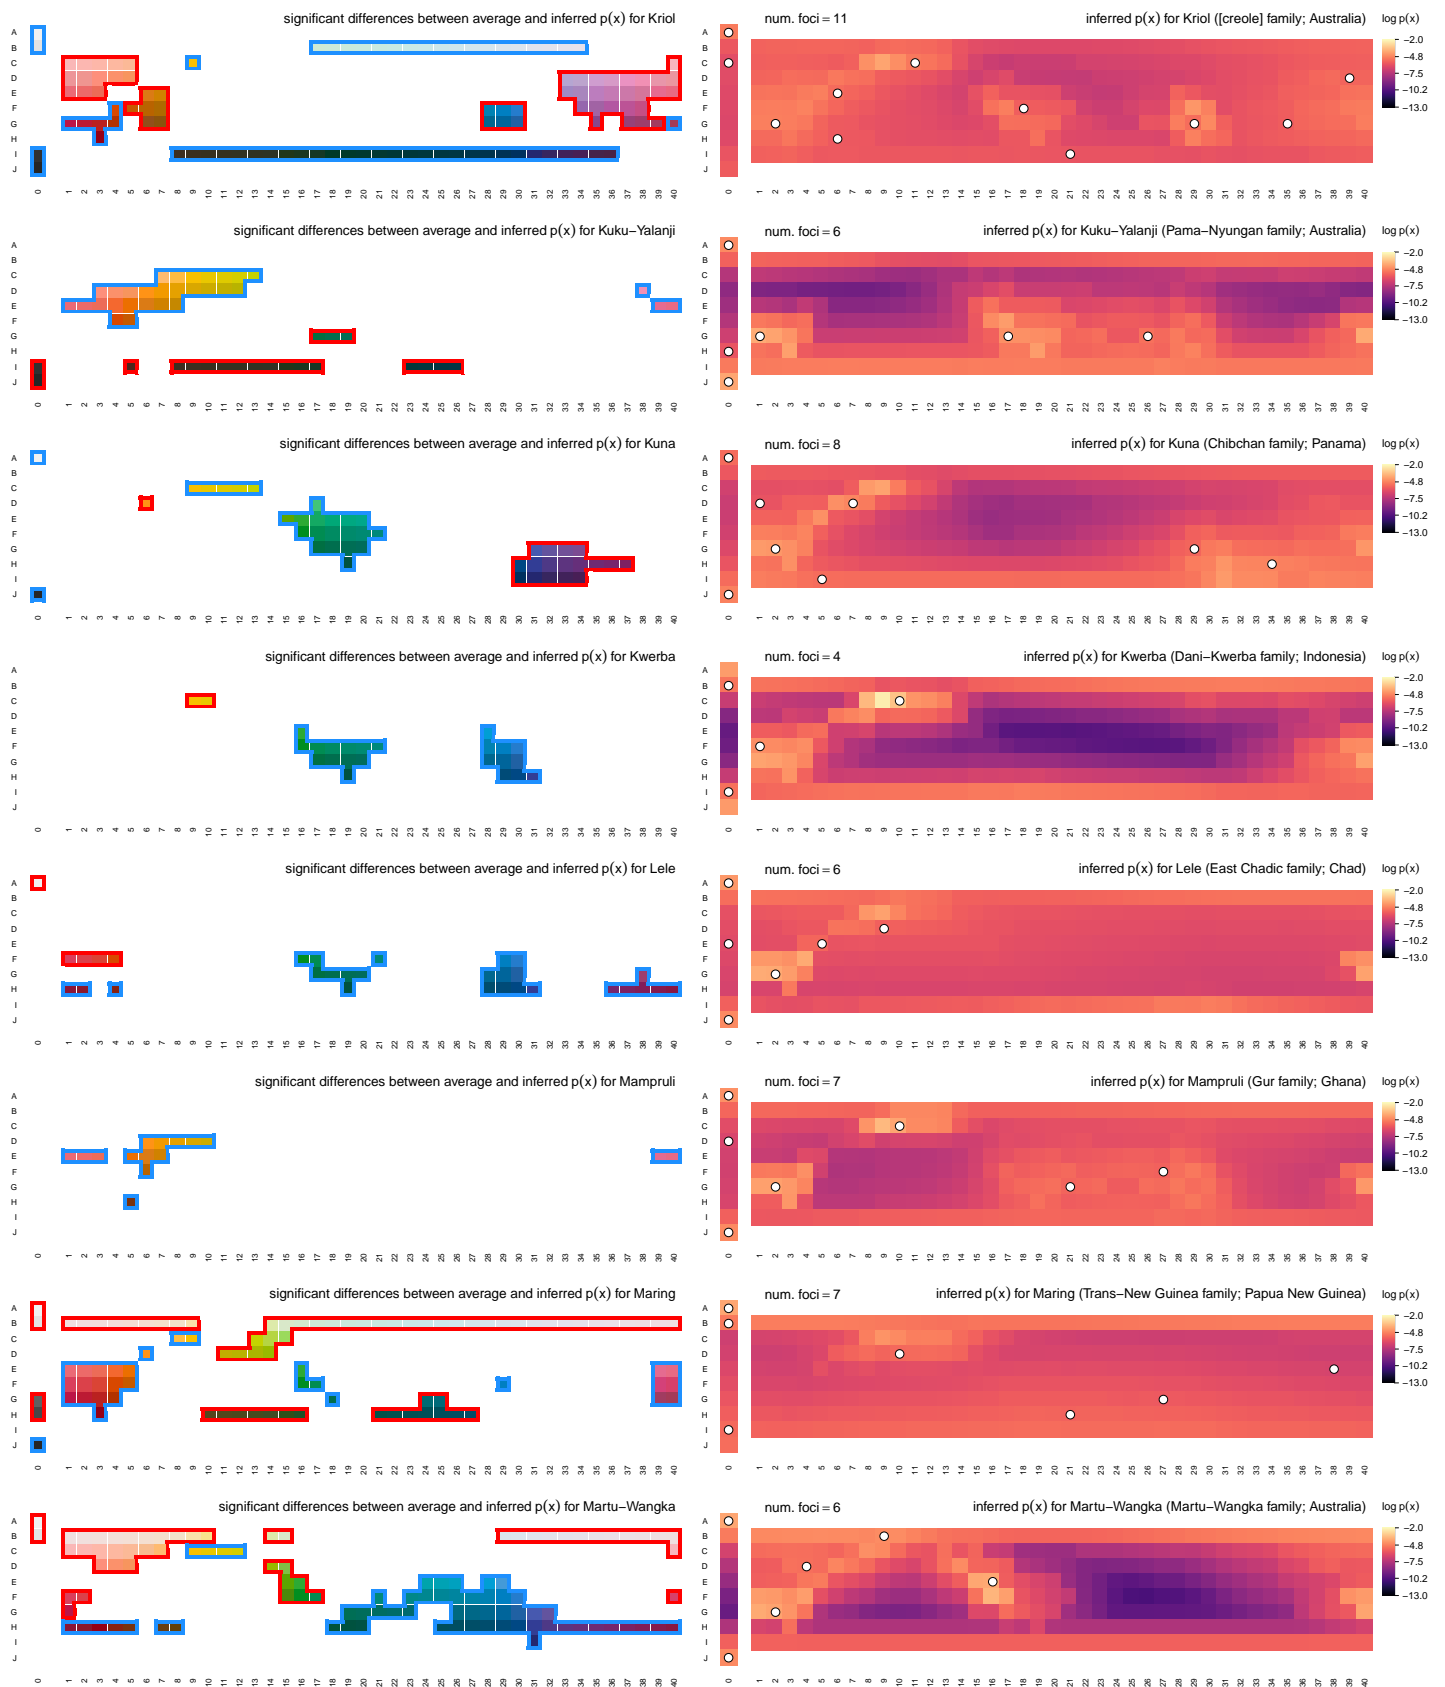

Figure E18. Inferred communicative needs for 130 languages on a common scale (continued).

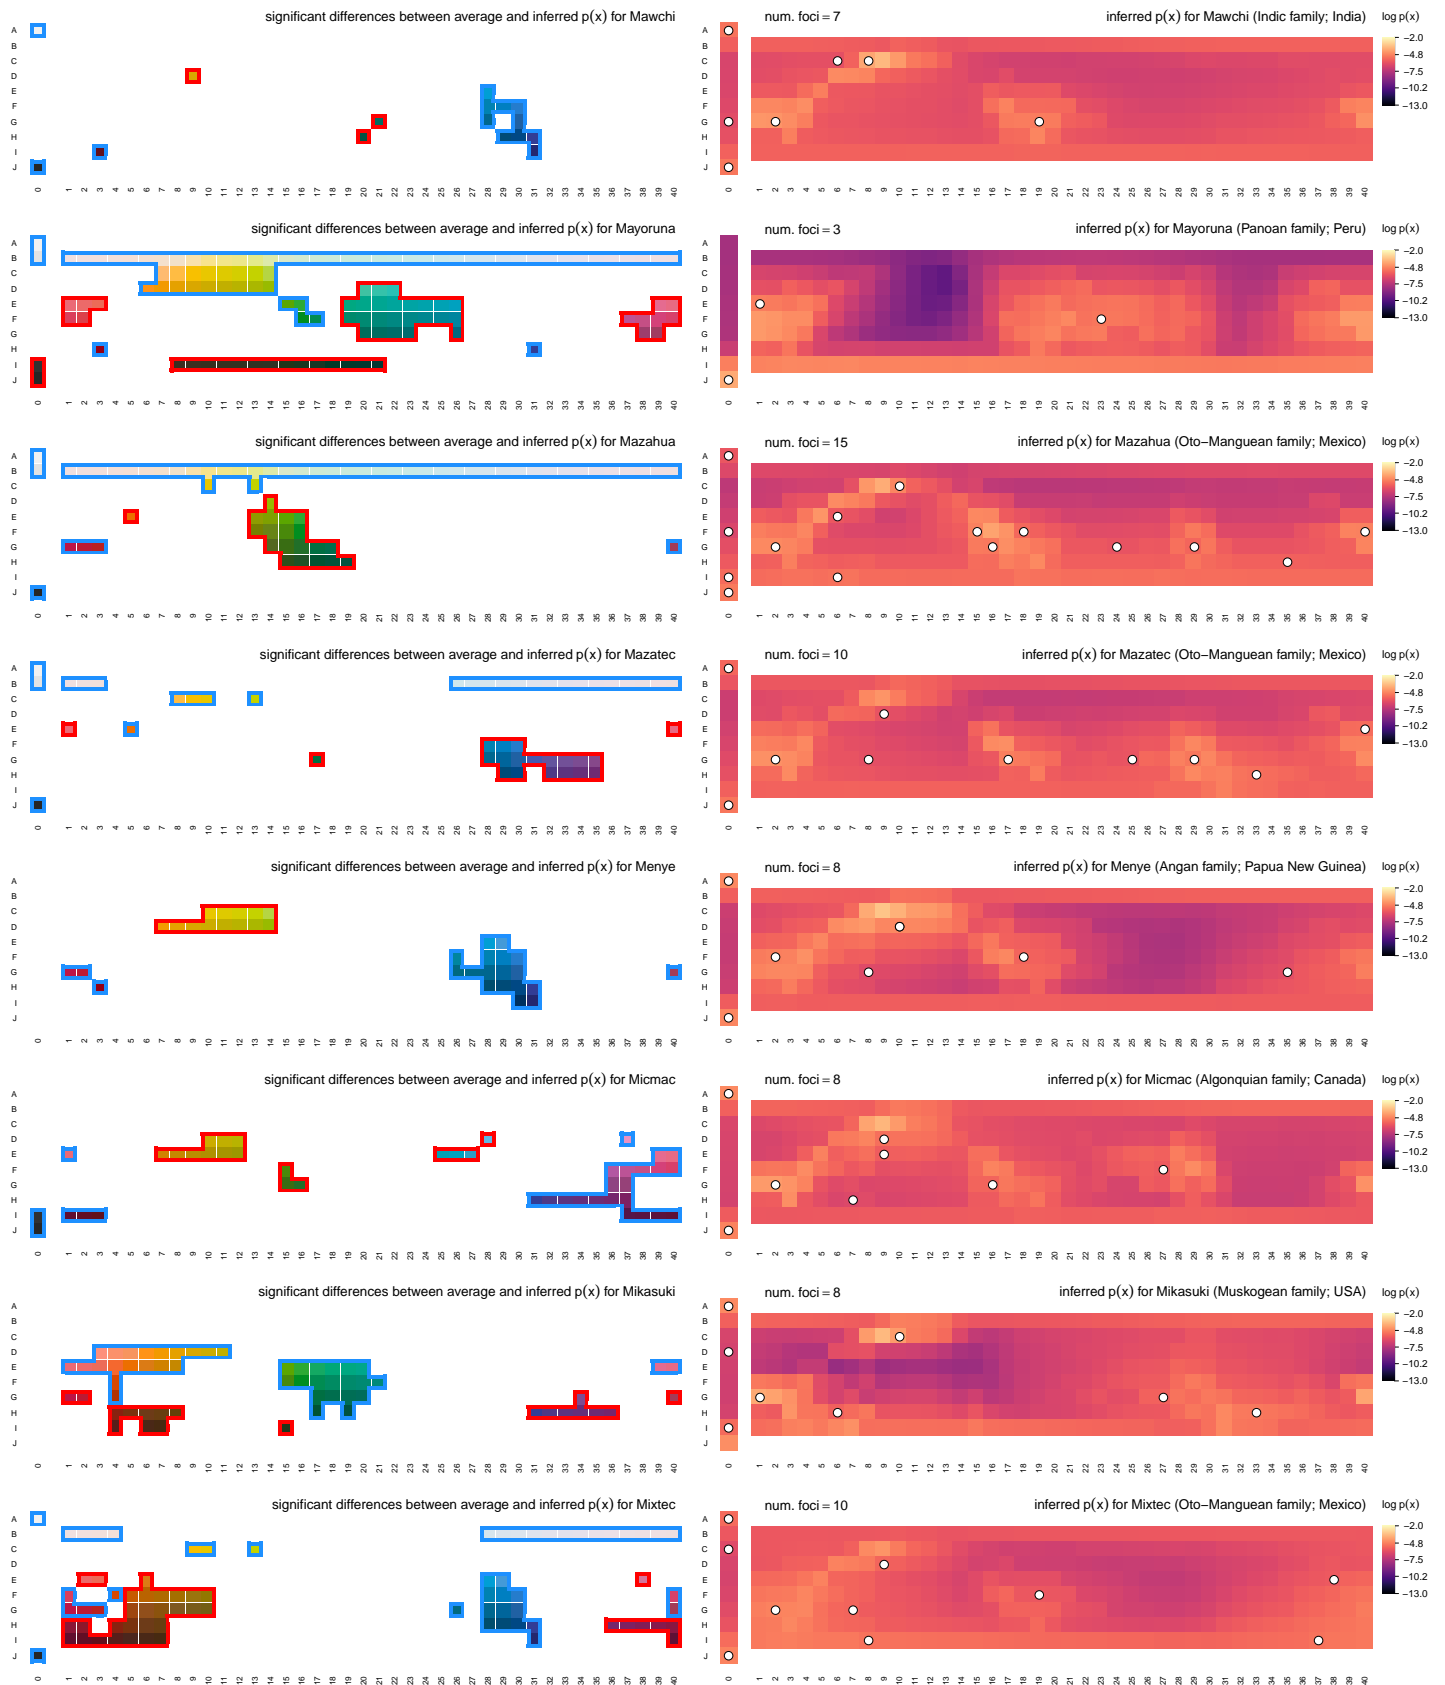

Figure E19. Inferred communicative needs for 130 languages on a common scale (continued).

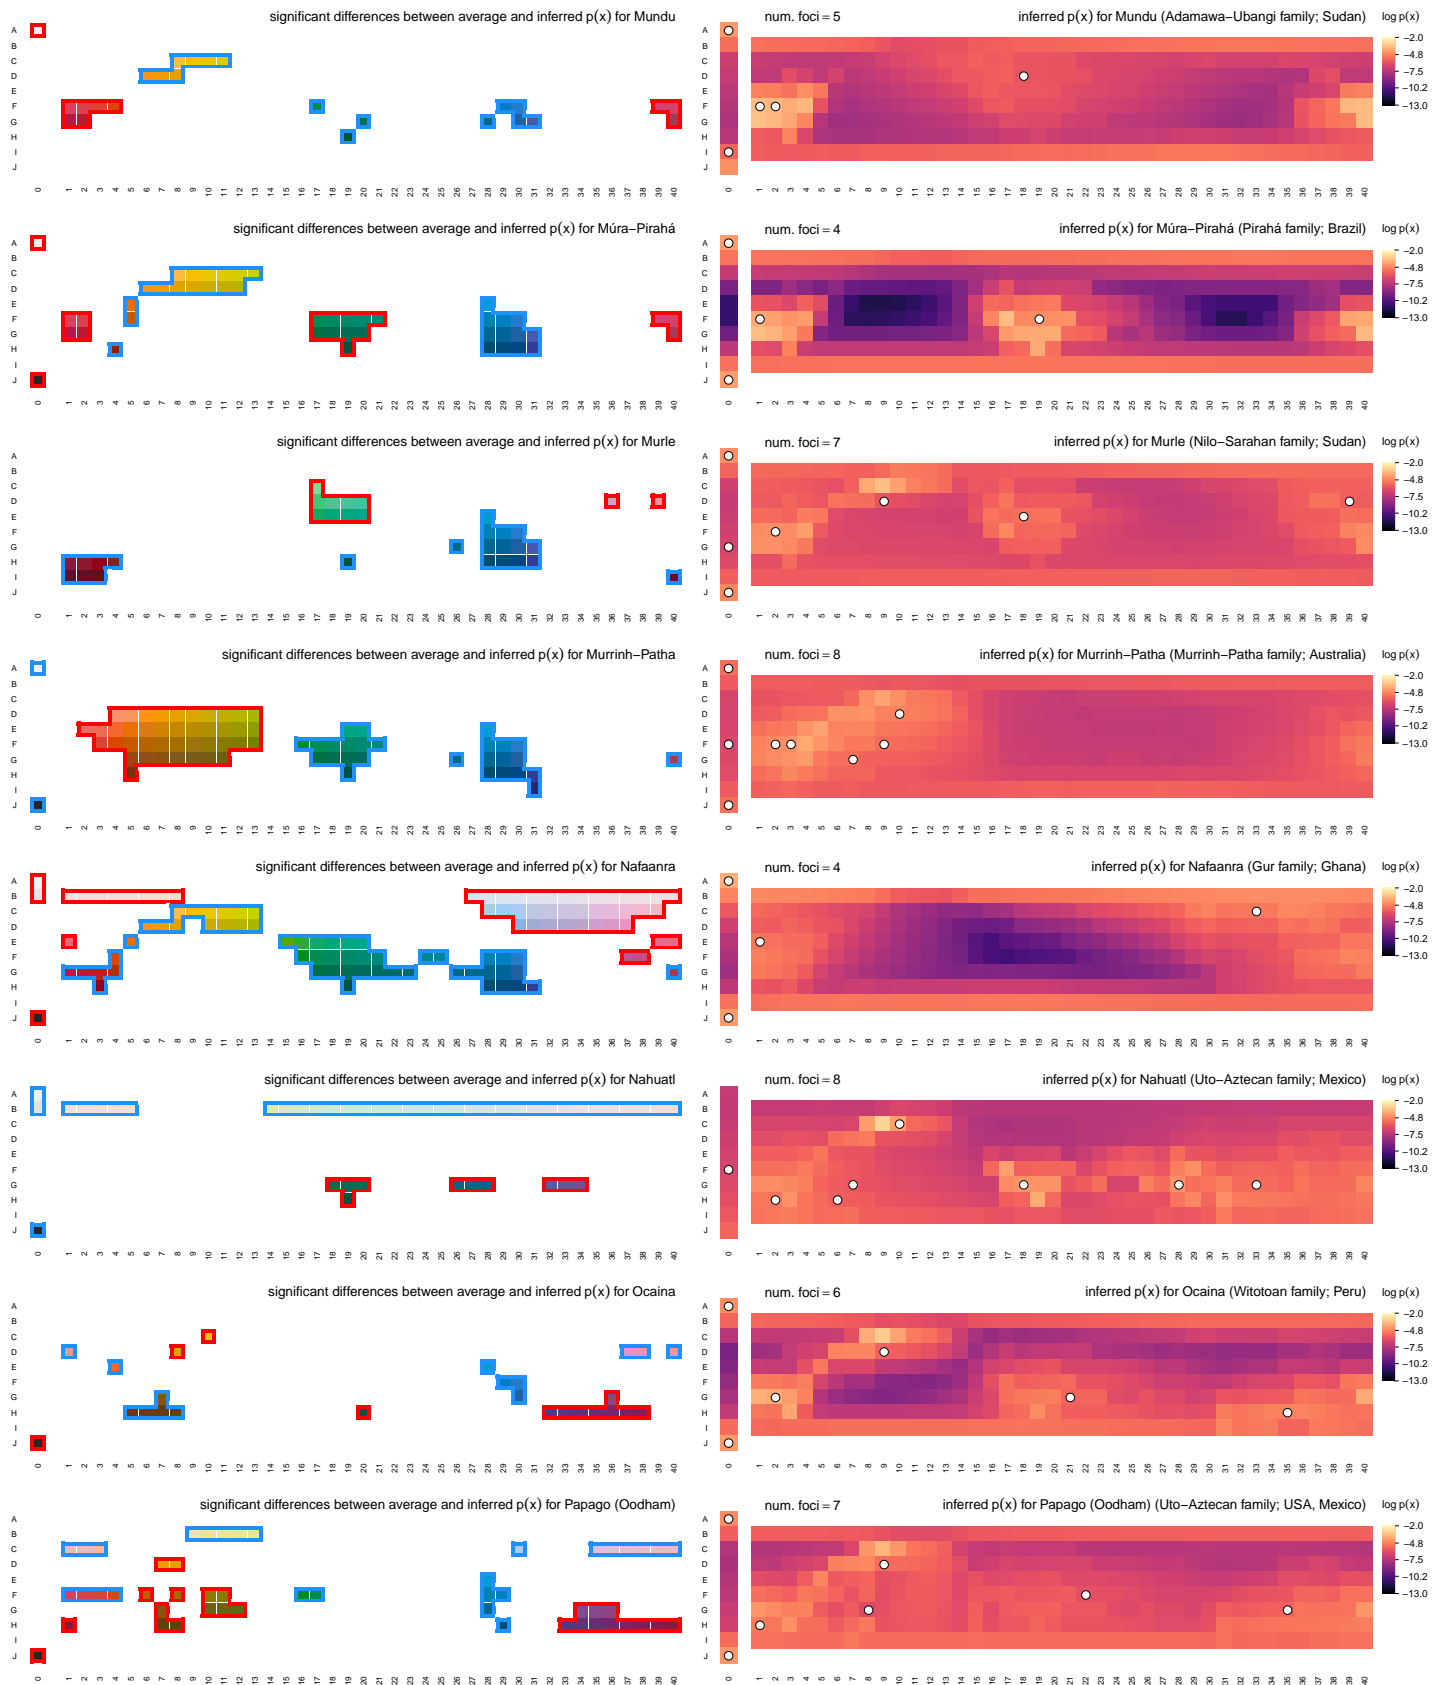

Figure E20. Inferred communicative needs for 130 languages on a common scale (continued).

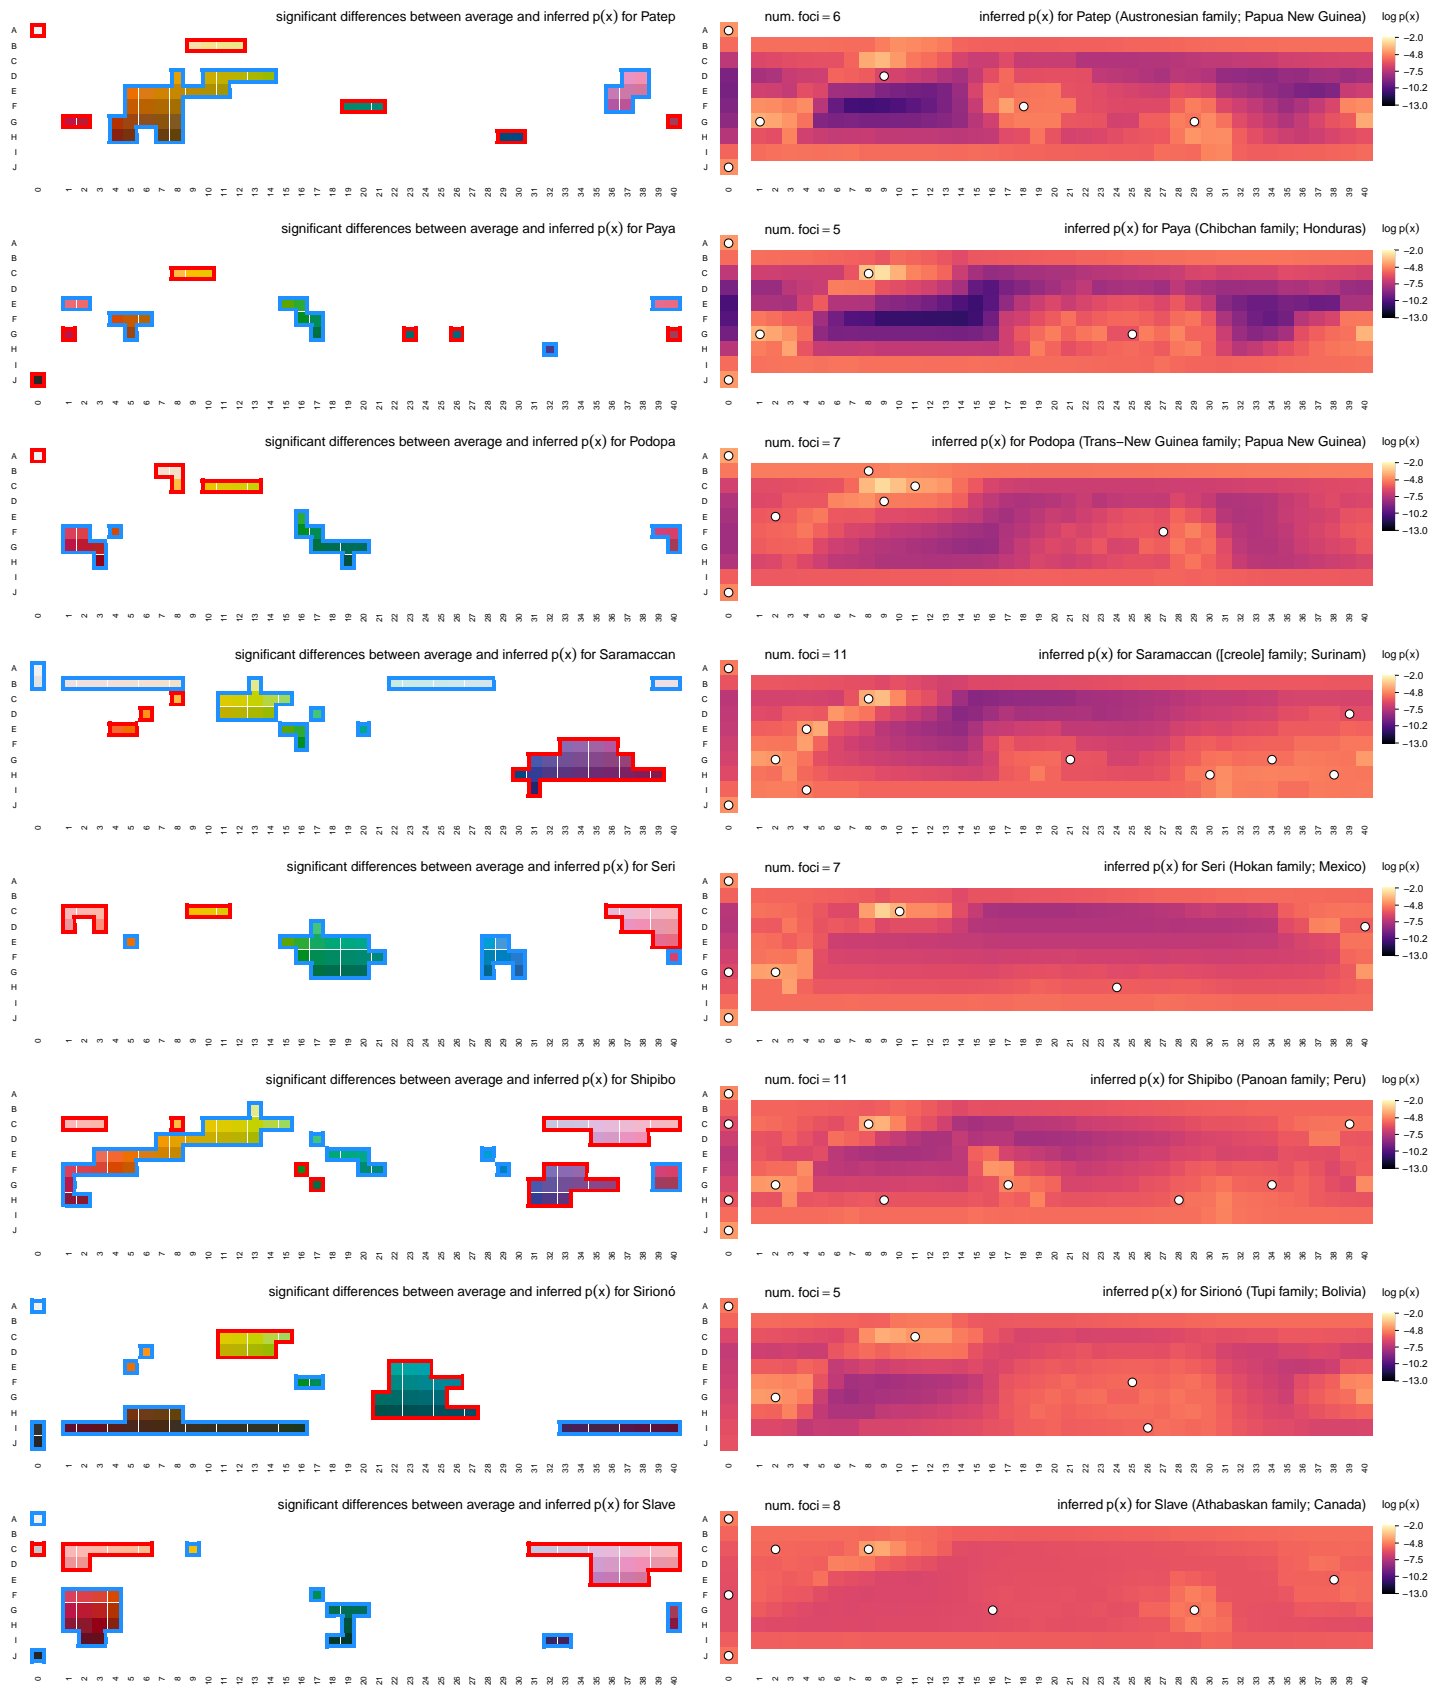

Figure E21. Inferred communicative needs for 130 languages on a common scale (continued).

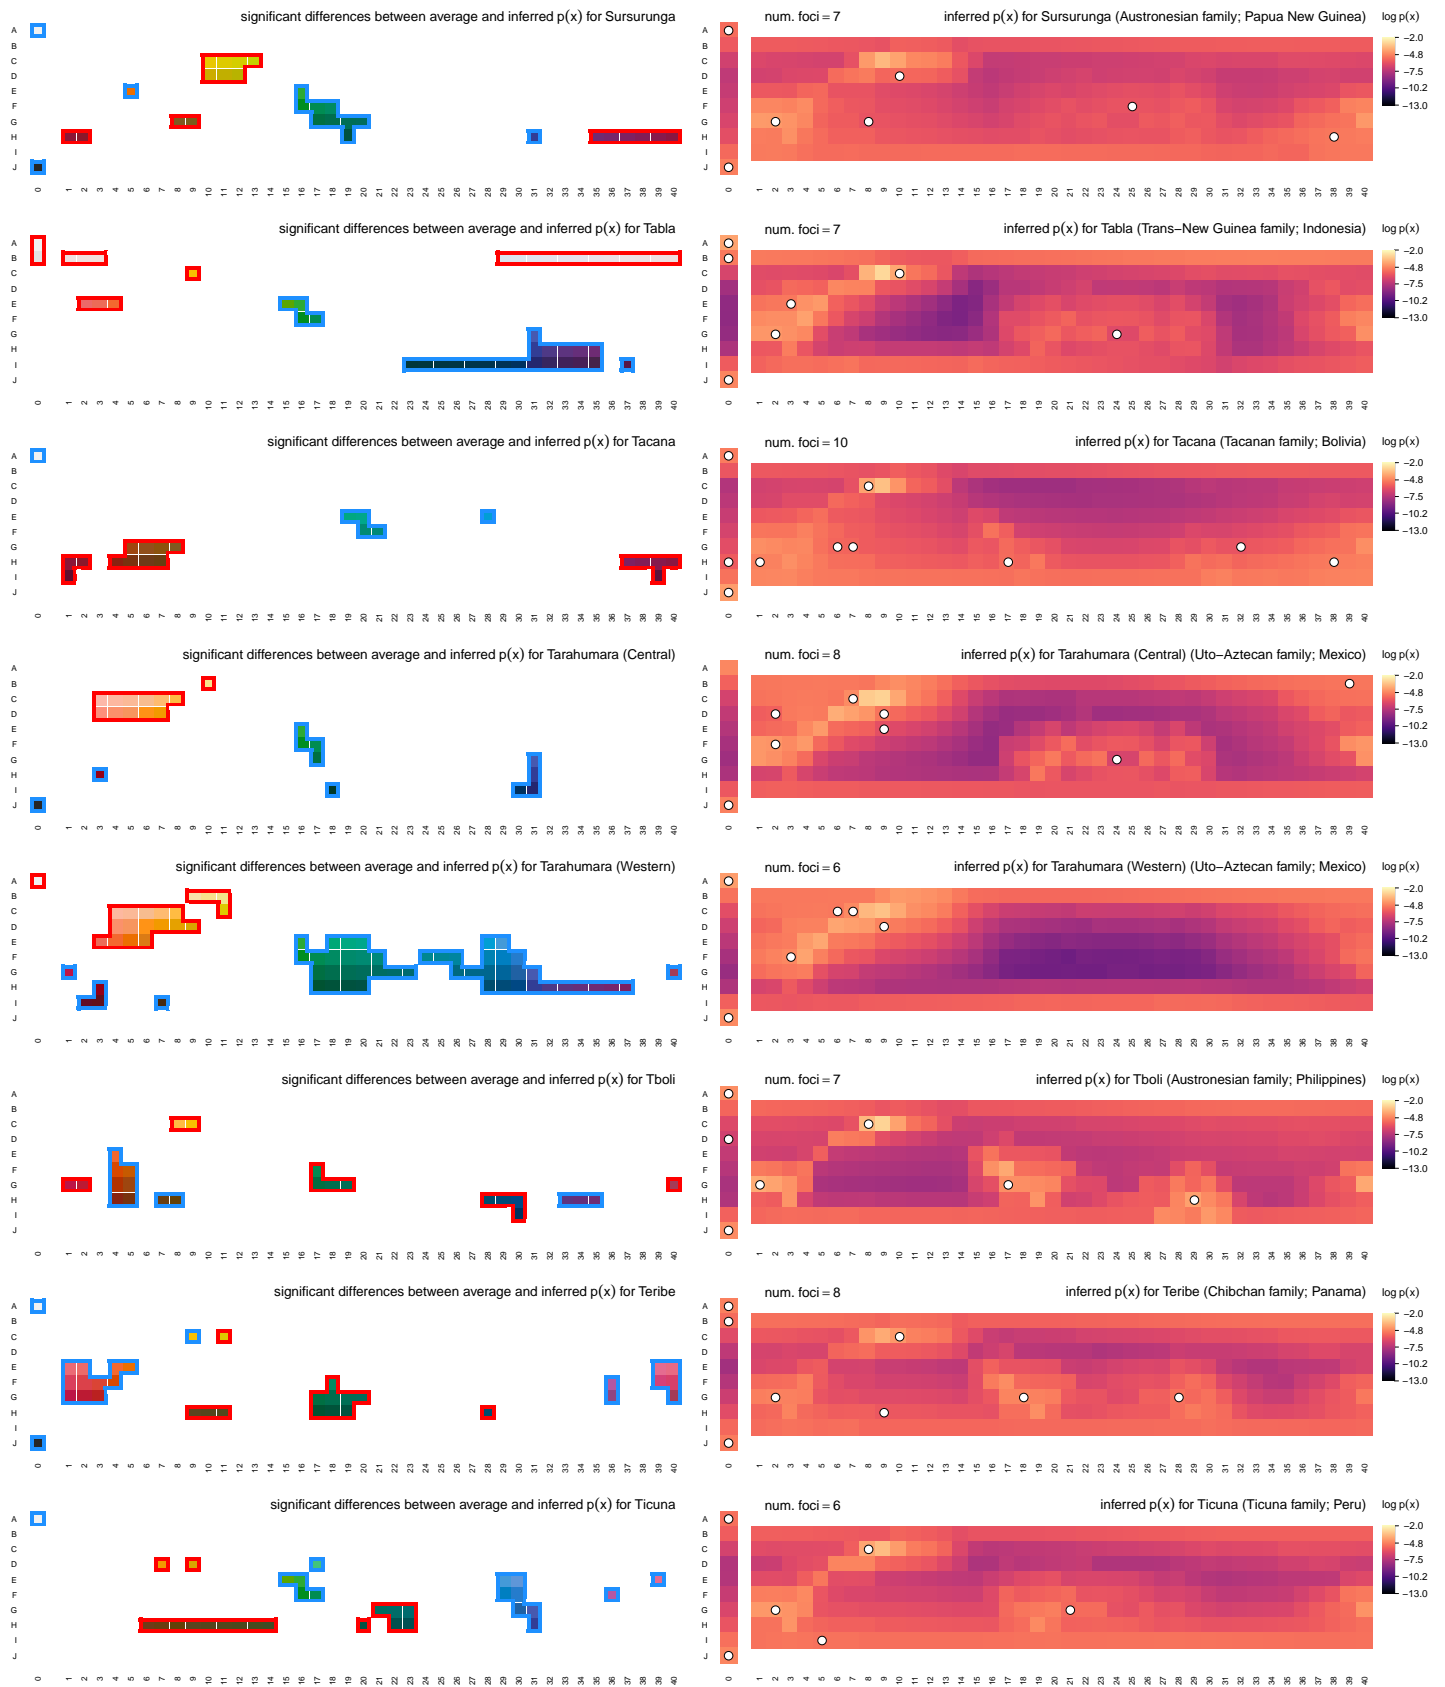

Figure E22. Inferred communicative needs for 130 languages on a common scale (continued).

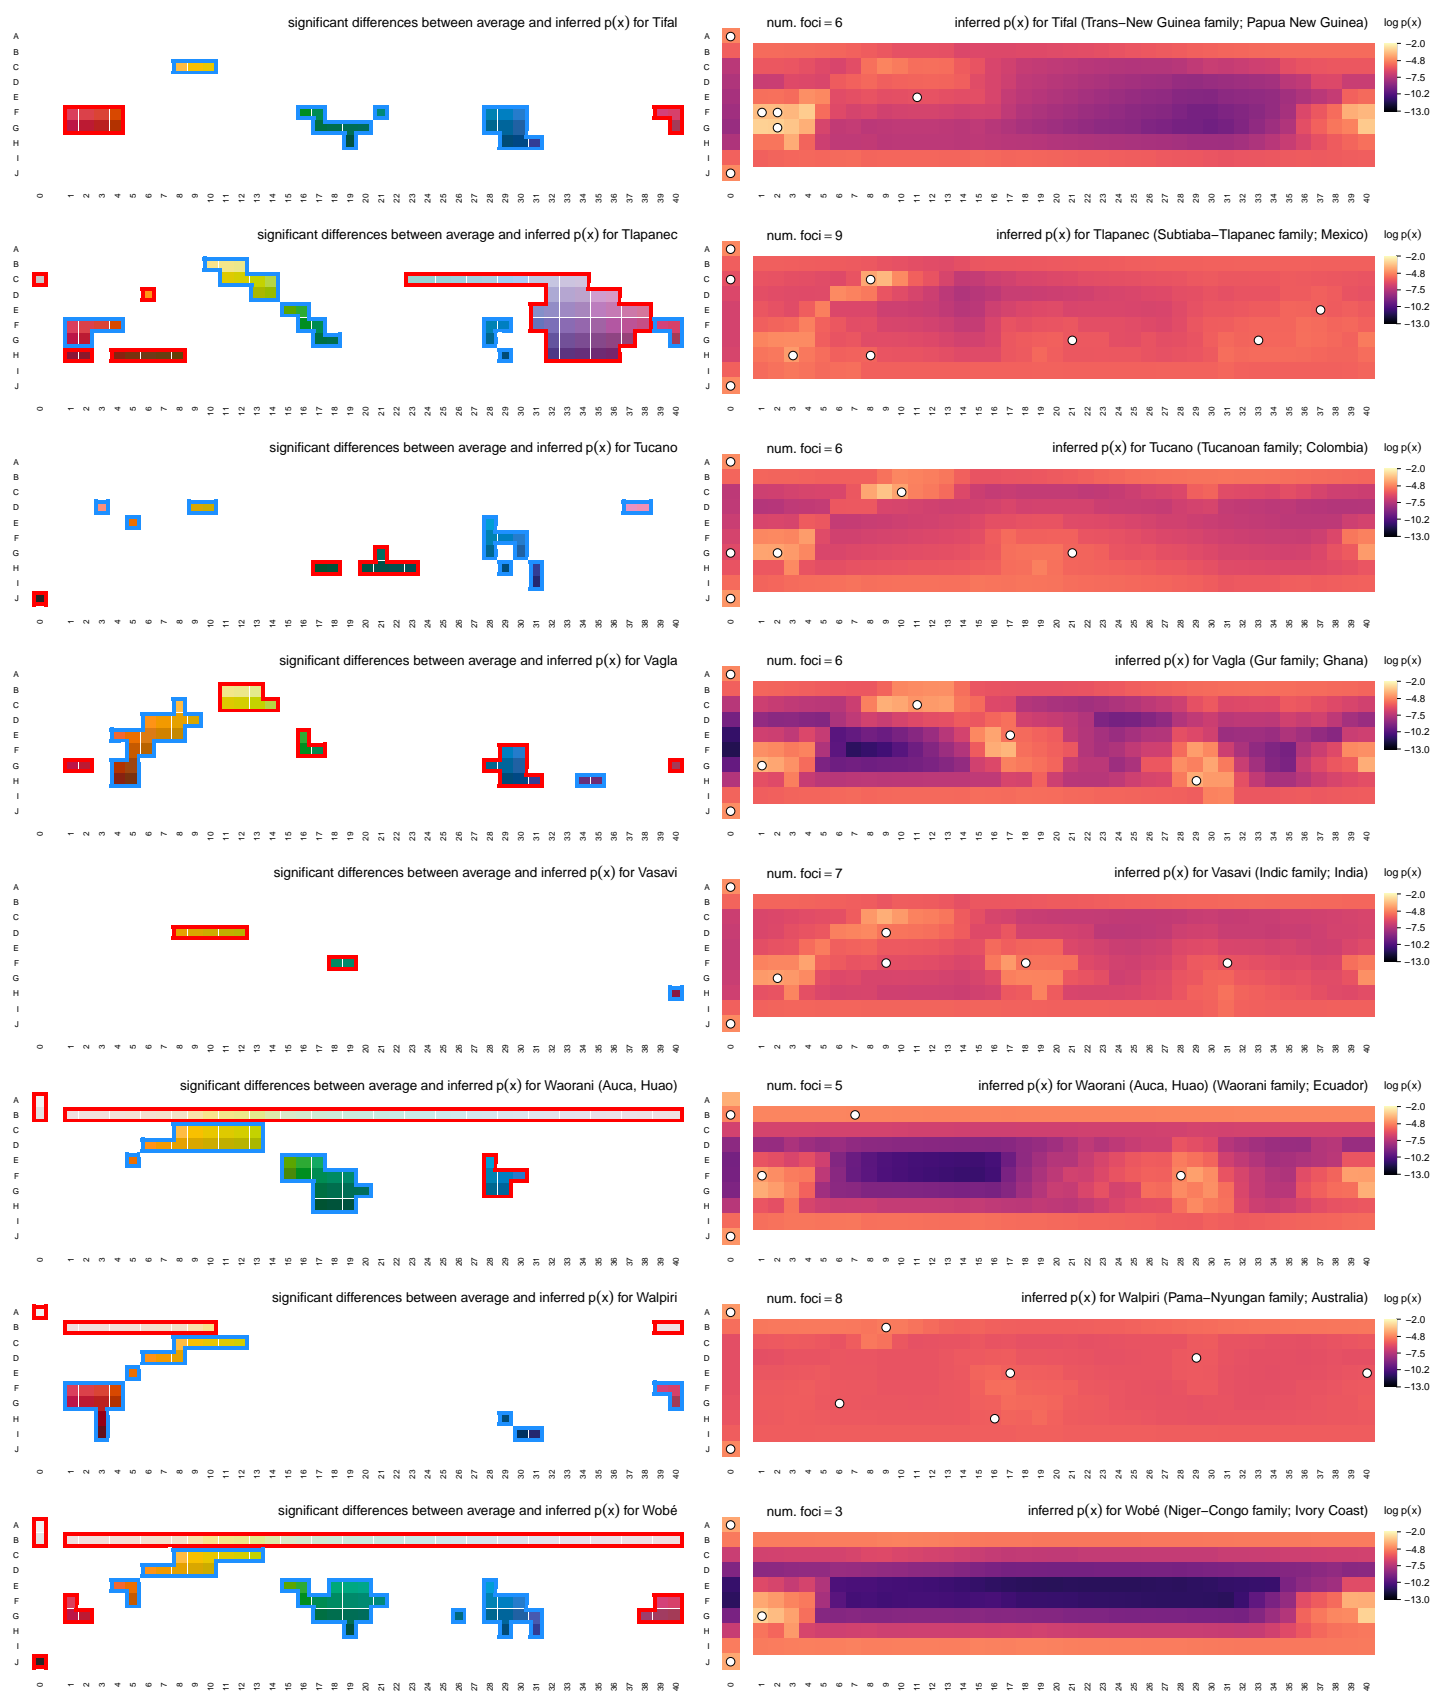

Figure E23. Inferred communicative needs for 130 languages on a common scale (continued).



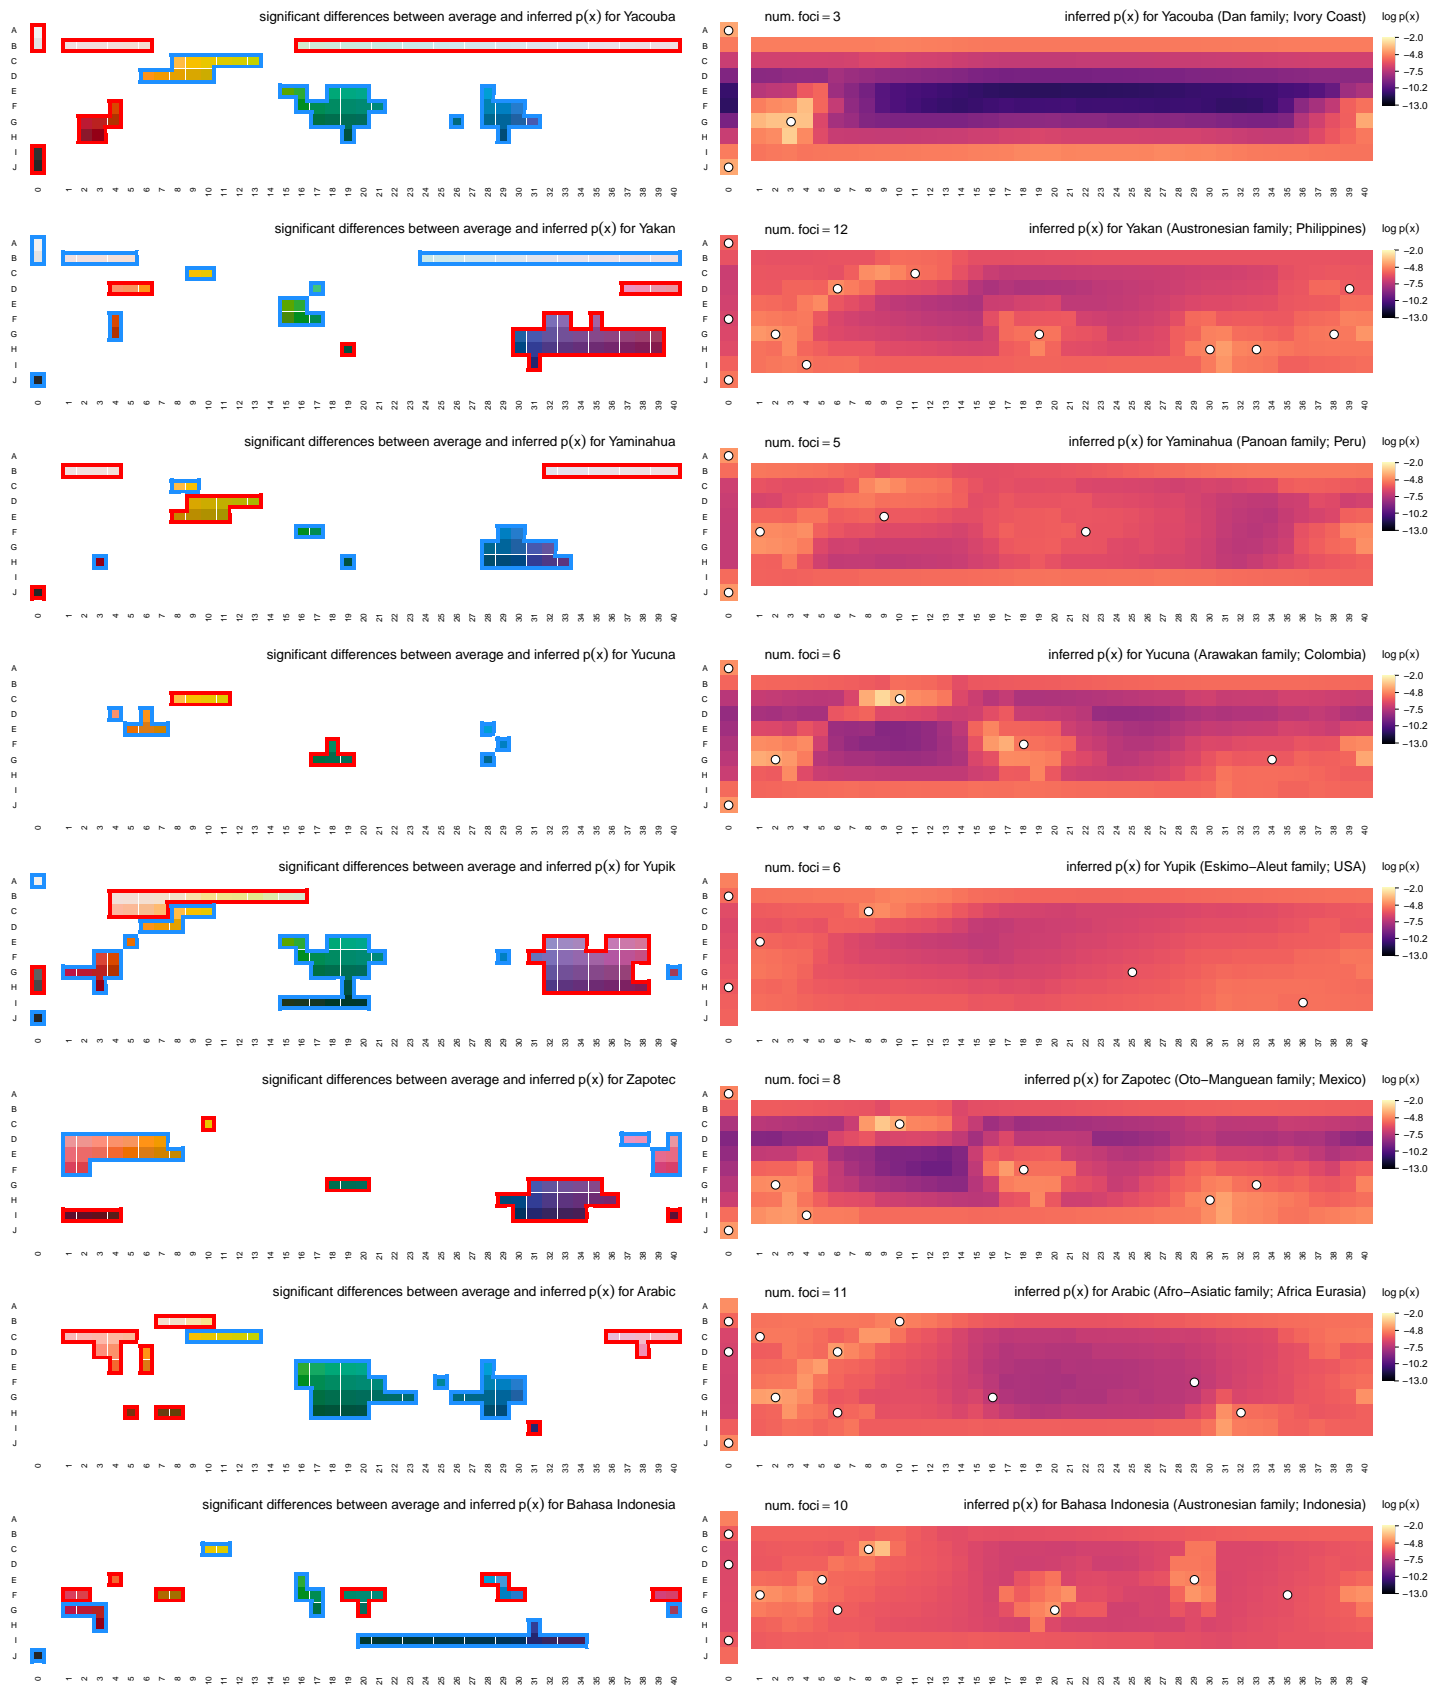

Figure E24. Inferred communicative needs for 130 languages on a common scale (continued).

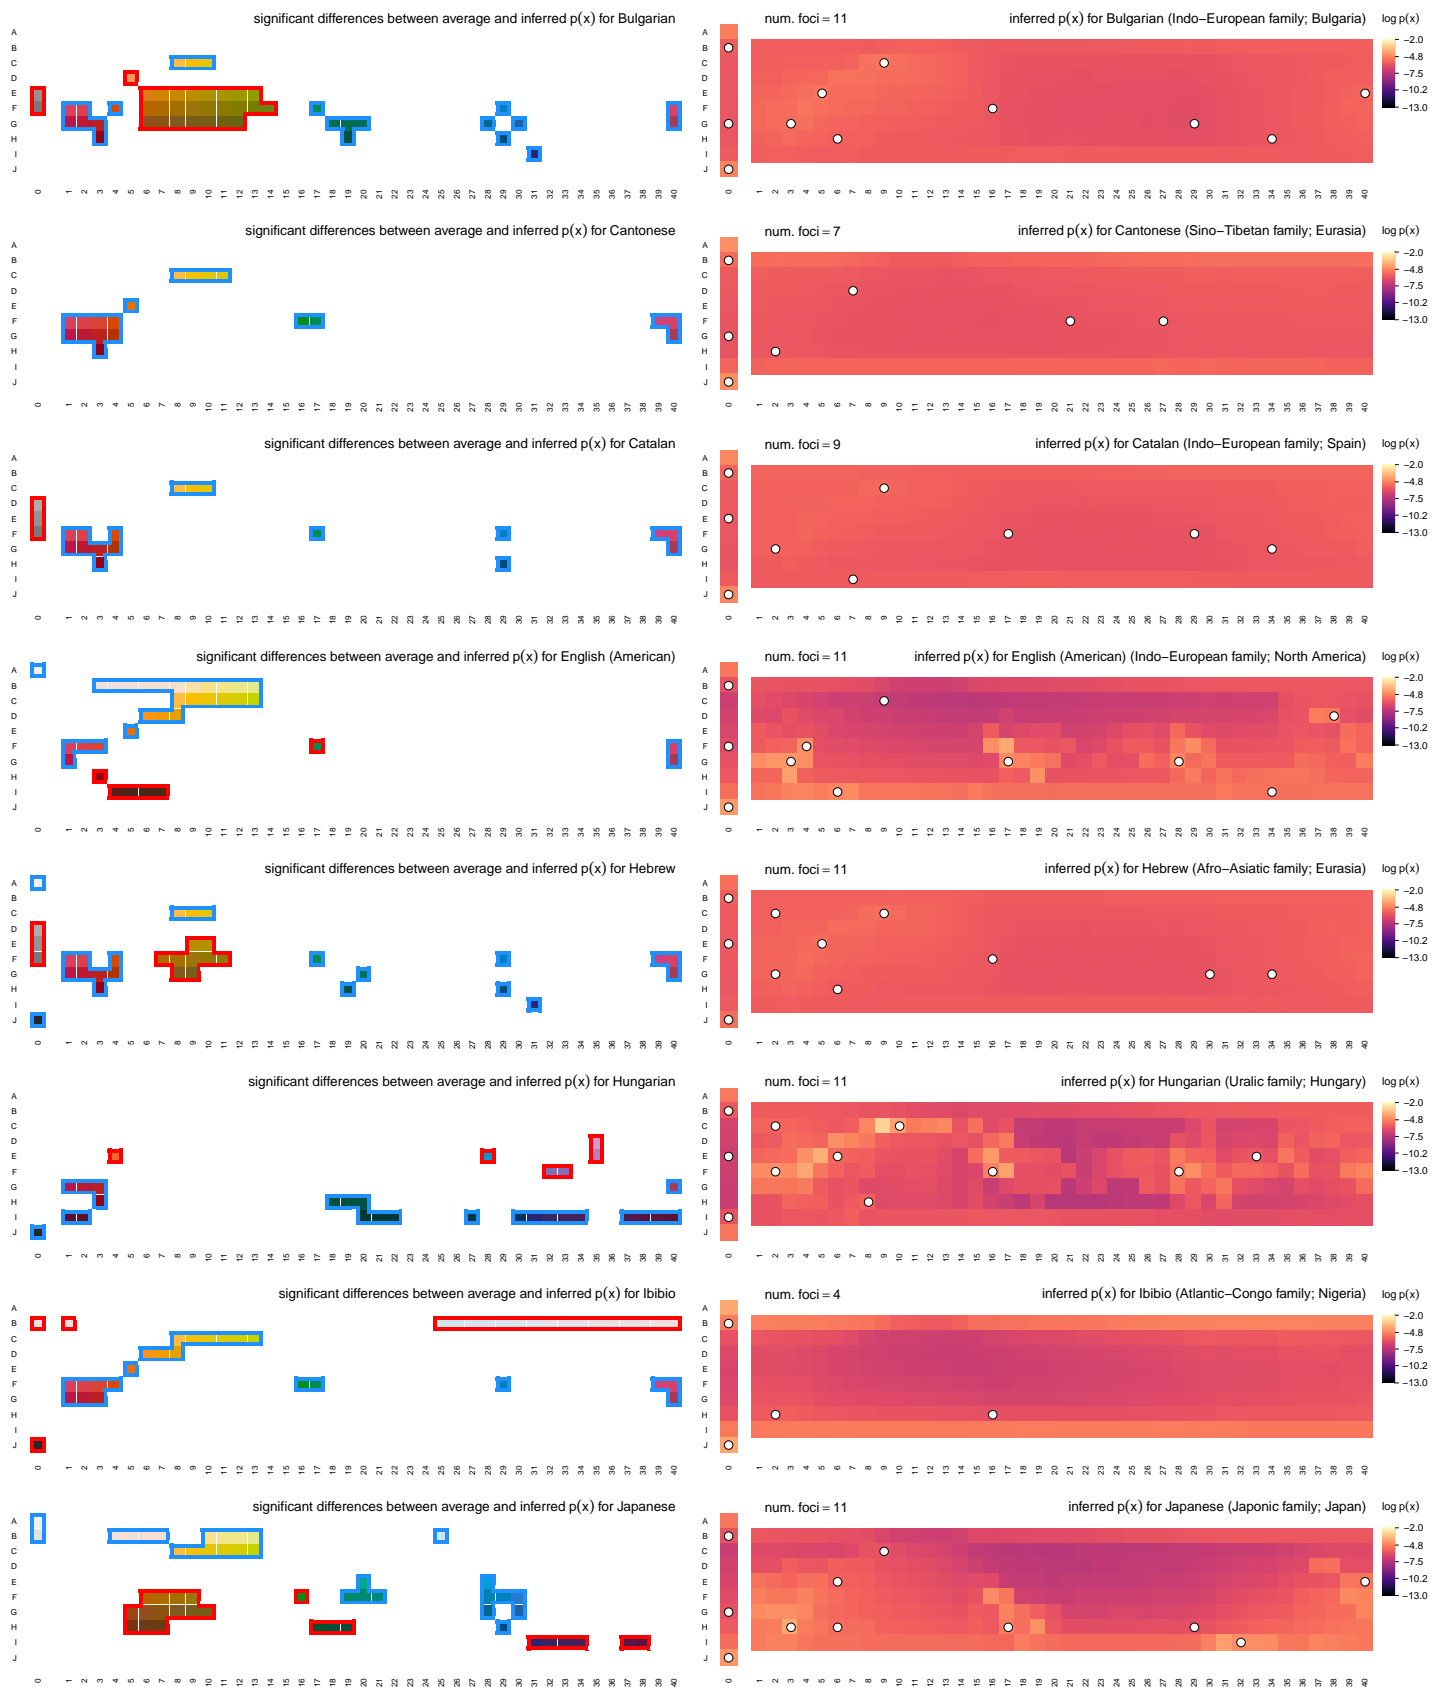

Figure E25. Inferred communicative needs for 130 languages on a common scale (continued).

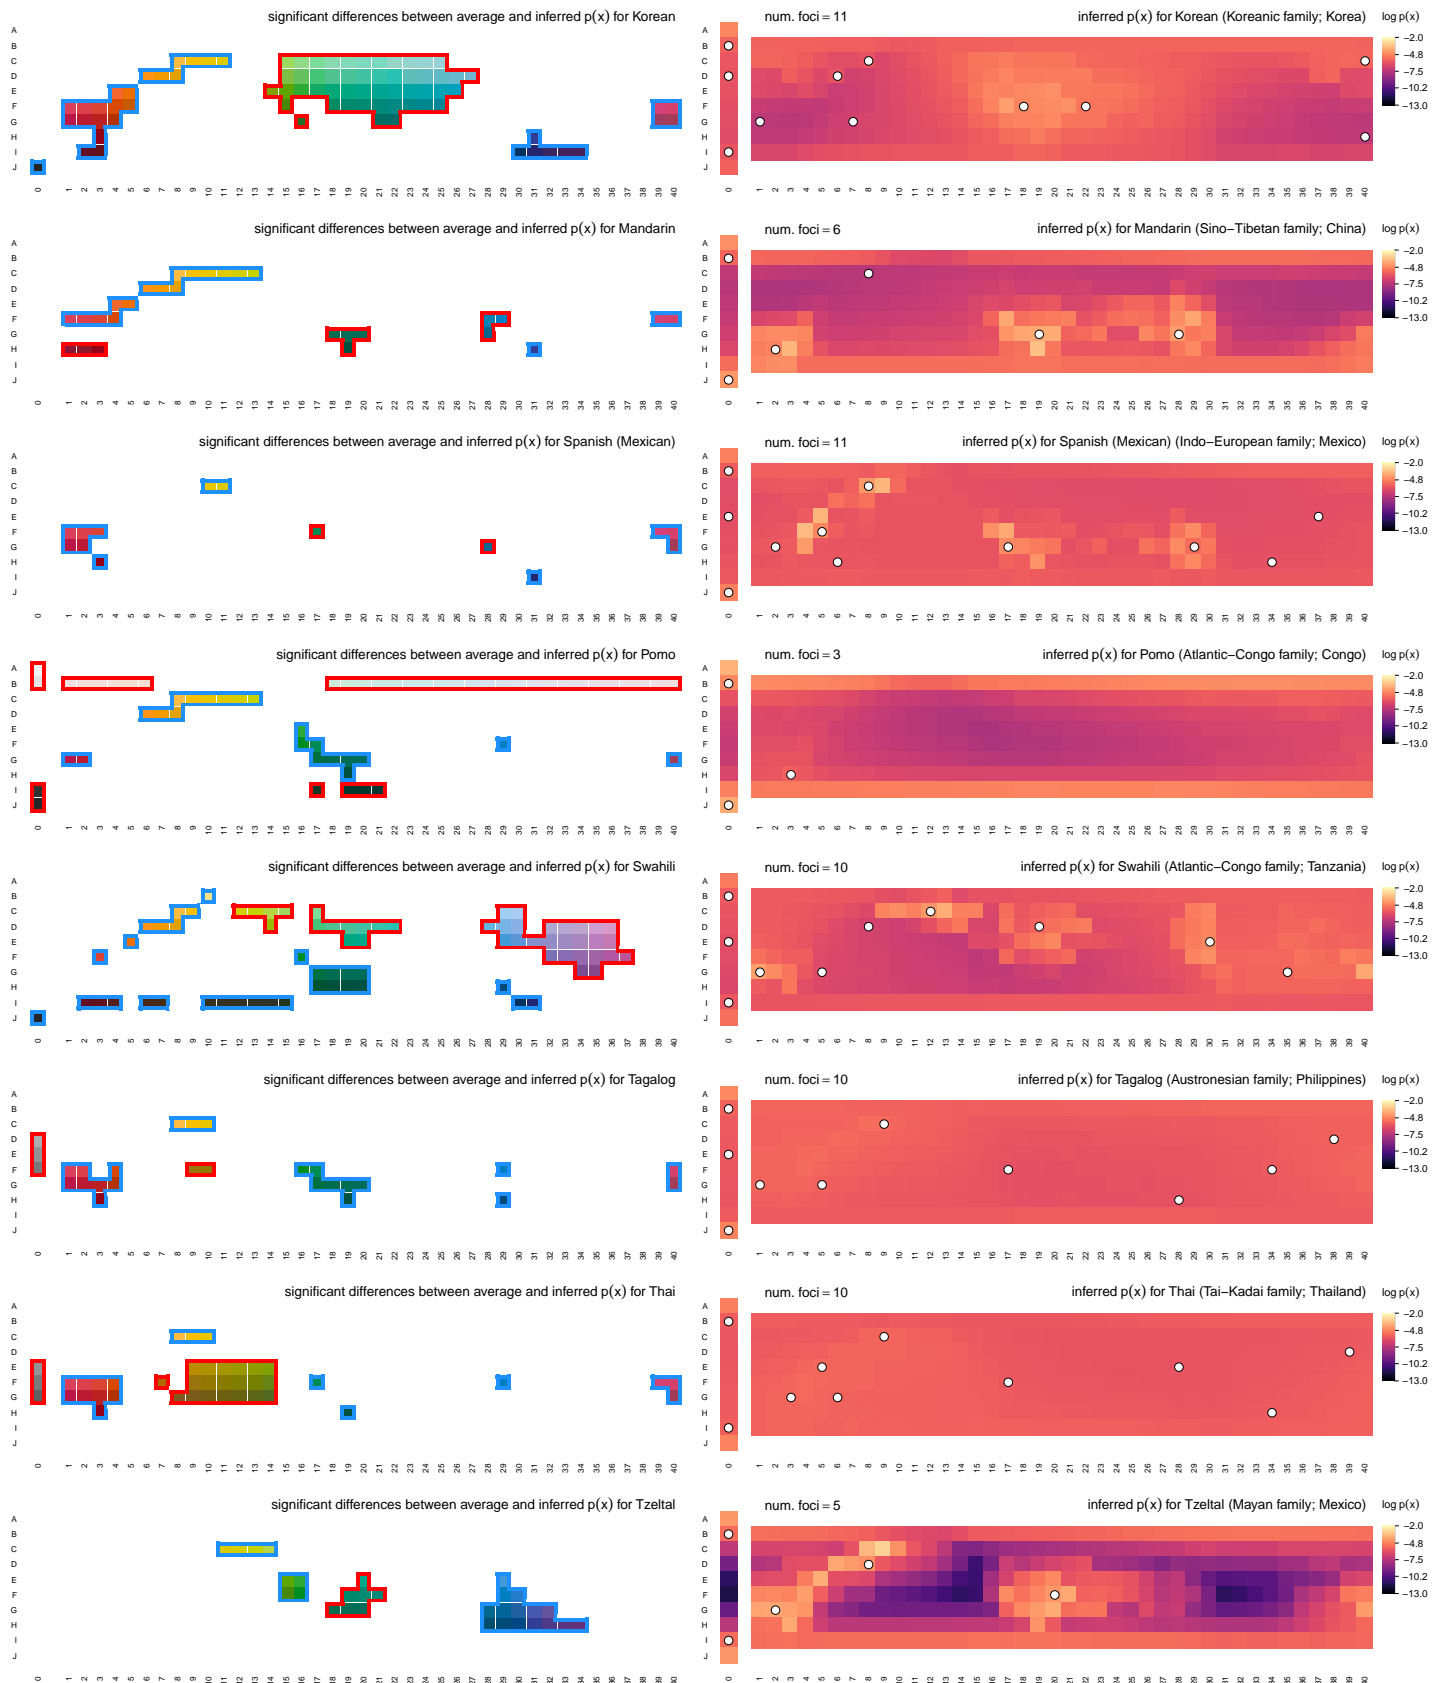

Figure E26. Inferred communicative needs for 130 languages on a common scale (continued).

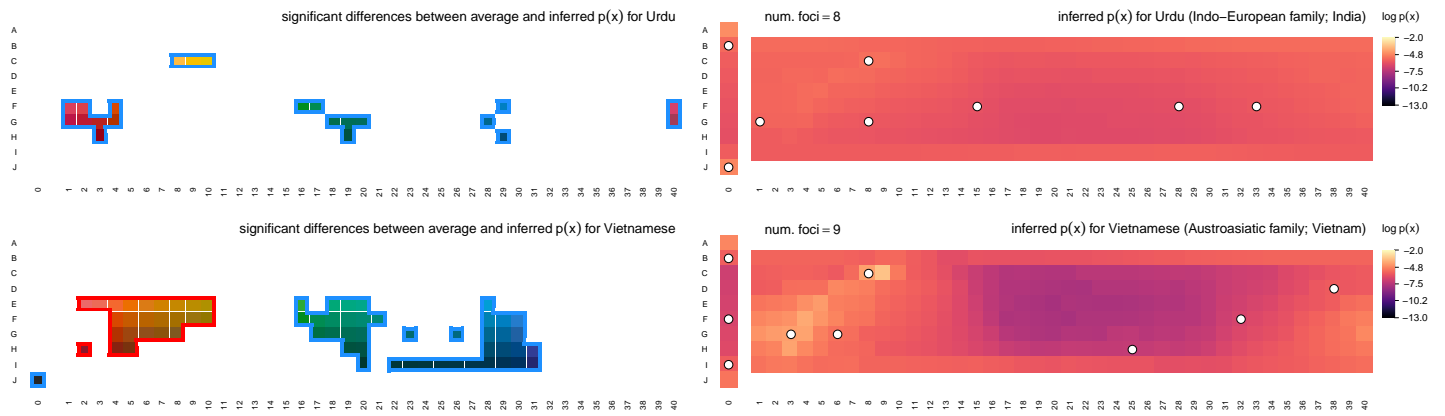

Figure E27. Inferred communicative needs for 130 languages on a common scale (continued).
